# Supplementary material for: A manually curated gene–phenotype catalogue for progeroid syndromes and premature aging
Source: Aging (Albany NY). 2026 Mar 30;18(1):234–60. doi: 10.18632/aging.206366 (PMC13285954; doi:10.18632/aging.206366)
Supplement: Supplementary Table 3 [file aging-18-1-206366-s003.xlsx]

## Sheet: enrichment.Process
Supplementary Table 3. Complete Gene Ontology (GO) Biological Process enrichment results from STRING.
#term ID	term description	observed gene count	background gene count	strength	signal	false discovery rate	matching proteins in your network (IDs)	matching proteins in your network (labels)
GO:0006259	DNA metabolic process	74	785	1.12	4.79	1.9e-58	9606.ENSP00000013807,9606.ENSP00000166345,9606.ENSP00000221486,9606.ENSP00000224950,9606.ENSP00000229769,9606.ENSP00000235310,9606.ENSP00000256996,9606.ENSP00000259008,9606.ENSP00000261584,9606.ENSP00000265038,9606.ENSP00000265433,9606.ENSP00000267415,9606.ENSP00000267430,9606.ENSP00000274606,9606.ENSP00000278616,9606.ENSP00000285021,9606.ENSP00000285398,9606.ENSP00000287437,9606.ENSP00000287647,…	ERCC1,TRIP13,RNASEH2A,STN1,FANCE,MAD2L2,DDB2,BRIP1,PALB2,ERCC8,NBN,TINF2,FANCM,NHP2,ATM,XPC,ERCC3,NSMCE2,FANCD2,FANCC,SLX4,SPRTN,WRN,RNASEH2C,TERT,ERCC4,FANCI,TYMS,TOP3A,ATRIP,WRAP53,MRE11,TRAIP,FANCF,NOP10,RAD51C,RNASEH2B,ATR,BLM,ERCC6,POT1,DNA2,XRCC2,RTEL1,RFWD3,SMC5,DKC1,SLF2,RNF113A,POLH,ZMPSTE24,XPA,FANCG,PCNA,BRCA2,FANCA,ERCC2,RBBP8,FANCL,CNBP,RECQL,BRCA1,POLD1,GTF2H5,RECQL4,ACD,TREX1,SAMHD…
GO:0006281	DNA repair	63	497	1.25	5.75	1.18e-55	9606.ENSP00000013807,9606.ENSP00000166345,9606.ENSP00000221486,9606.ENSP00000229769,9606.ENSP00000235310,9606.ENSP00000256996,9606.ENSP00000259008,9606.ENSP00000261584,9606.ENSP00000265038,9606.ENSP00000265433,9606.ENSP00000267430,9606.ENSP00000278616,9606.ENSP00000285021,9606.ENSP00000285398,9606.ENSP00000287437,9606.ENSP00000287647,9606.ENSP00000289081,9606.ENSP00000294008,9606.ENSP00000295050,…	ERCC1,TRIP13,RNASEH2A,FANCE,MAD2L2,DDB2,BRIP1,PALB2,ERCC8,NBN,FANCM,ATM,XPC,ERCC3,NSMCE2,FANCD2,FANCC,SLX4,SPRTN,WRN,RNASEH2C,ERCC4,FANCI,TOP3A,ATRIP,WRAP53,MRE11,TRAIP,FANCF,RAD51C,RNASEH2B,ATR,BLM,ERCC6,DNA2,XRCC2,RTEL1,RFWD3,SMC5,SLF2,RNF113A,POLH,ZMPSTE24,XPA,FANCG,PCNA,BRCA2,FANCA,ERCC2,RBBP8,FANCL,RECQL,BRCA1,POLD1,GTF2H5,RECQL4,TREX1,SAMHD1,RAD51,UBE2T,DCLRE1B,FANCB,ERCC5
GO:0006974	Cellular response to DNA damage stimulus	68	744	1.1	4.53	2.69e-52	9606.ENSP00000013807,9606.ENSP00000166345,9606.ENSP00000221486,9606.ENSP00000229769,9606.ENSP00000235310,9606.ENSP00000256996,9606.ENSP00000258149,9606.ENSP00000259008,9606.ENSP00000261584,9606.ENSP00000265038,9606.ENSP00000265433,9606.ENSP00000267430,9606.ENSP00000278616,9606.ENSP00000285021,9606.ENSP00000285398,9606.ENSP00000287437,9606.ENSP00000287647,9606.ENSP00000289081,9606.ENSP00000294008,…	ERCC1,TRIP13,RNASEH2A,FANCE,MAD2L2,DDB2,MDM2,BRIP1,PALB2,ERCC8,NBN,FANCM,ATM,XPC,ERCC3,NSMCE2,FANCD2,FANCC,SLX4,SPRTN,WRN,RNASEH2C,ERCC4,FANCI,TOP3A,ATRIP,WRAP53,MRE11,TRAIP,FANCF,CEP63,RAD51C,RNASEH2B,ATR,BLM,ERCC6,DNA2,XRCC2,RTEL1,RFWD3,SMC5,SLF2,RNF113A,POLH,ZMPSTE24,XPA,FANCG,PCNA,BRCA2,FANCA,ERCC2,RBBP8,FANCL,RECQL,BRCA1,PIK3R1,POLD1,GTF2H5,RECQL4,ACD,TREX1,SAMHD1,RAD51,UBE2T,DCLRE1B,FANCB,C…
GO:0090304	Nucleic acid metabolic process	88	2203	0.74	2.31	3.13e-43	9606.ENSP00000013807,9606.ENSP00000166345,9606.ENSP00000219281,9606.ENSP00000221486,9606.ENSP00000224950,9606.ENSP00000229769,9606.ENSP00000235310,9606.ENSP00000256996,9606.ENSP00000259008,9606.ENSP00000261584,9606.ENSP00000261772,9606.ENSP00000262027,9606.ENSP00000265038,9606.ENSP00000265433,9606.ENSP00000267415,9606.ENSP00000267430,9606.ENSP00000274606,9606.ENSP00000278616,9606.ENSP00000285021,…	ERCC1,TRIP13,USB1,RNASEH2A,STN1,FANCE,MAD2L2,DDB2,BRIP1,PALB2,AARS1,MARS1,ERCC8,NBN,TINF2,FANCM,NHP2,ATM,XPC,ERCC3,LSM11,NSMCE2,FANCD2,FANCC,SLX4,SPRTN,WRN,RNASEH2C,TERT,ERCC4,FANCI,TYMS,TOP3A,ATRIP,WRAP53,MRE11,TRAIP,FANCF,NOP10,RAD51C,RNASEH2B,ATR,BLM,ERCC6,GTF2E2,CAVIN1,POT1,DNA2,XRCC2,RTEL1,RFWD3,SMC5,ADAR,POLR3GL,DKC1,SLF2,RNF113A,POLH,EXOSC2,POLR3A,ZMPSTE24,YRDC,XPA,FANCG,PCNA,BRCA2,FANCA,E…
GO:0033554	Cellular response to stress	76	1572	0.83	2.66	5.54e-41	9606.ENSP00000013807,9606.ENSP00000166345,9606.ENSP00000221486,9606.ENSP00000229769,9606.ENSP00000235310,9606.ENSP00000256996,9606.ENSP00000258149,9606.ENSP00000259008,9606.ENSP00000261584,9606.ENSP00000265038,9606.ENSP00000265433,9606.ENSP00000267430,9606.ENSP00000275493,9606.ENSP00000278616,9606.ENSP00000285021,9606.ENSP00000285398,9606.ENSP00000287437,9606.ENSP00000287647,9606.ENSP00000289081,…	ERCC1,TRIP13,RNASEH2A,FANCE,MAD2L2,DDB2,MDM2,BRIP1,PALB2,ERCC8,NBN,FANCM,EGFR,ATM,XPC,ERCC3,NSMCE2,FANCD2,FANCC,SLX4,SPRTN,WRN,RNASEH2C,TERT,ERCC4,FANCI,TOP3A,ATRIP,WRAP53,MRE11,TRAIP,FANCF,CEP63,RAD51C,RNASEH2B,CAV1,ATR,BLM,ERCC6,DNA2,TOMM7,XRCC2,RTEL1,RFWD3,SMC5,DDR2,LMNA,SLF2,RNF113A,POLH,ZMPSTE24,XPA,FANCG,PCNA,BRCA2,FANCA,ERCC2,RBBP8,PYCR1,FANCL,RECQL,BRCA1,PIK3R1,SLC25A24,POLD1,GTF2H5,RECQL…
GO:0006139	Nucleobase-containing compound metabolic process	89	2722	0.66	1.91	3.67e-37	9606.ENSP00000013807,9606.ENSP00000166345,9606.ENSP00000219281,9606.ENSP00000221486,9606.ENSP00000224950,9606.ENSP00000229769,9606.ENSP00000235310,9606.ENSP00000256996,9606.ENSP00000259008,9606.ENSP00000261584,9606.ENSP00000261772,9606.ENSP00000262027,9606.ENSP00000265038,9606.ENSP00000265433,9606.ENSP00000267415,9606.ENSP00000267430,9606.ENSP00000273398,9606.ENSP00000274606,9606.ENSP00000278616,…	ERCC1,TRIP13,USB1,RNASEH2A,STN1,FANCE,MAD2L2,DDB2,BRIP1,PALB2,AARS1,MARS1,ERCC8,NBN,TINF2,FANCM,ATP6V1A,NHP2,ATM,XPC,ERCC3,LSM11,NSMCE2,FANCD2,FANCC,SLX4,SPRTN,WRN,RNASEH2C,TERT,ERCC4,FANCI,TYMS,TOP3A,ATRIP,WRAP53,MRE11,TRAIP,FANCF,NOP10,RAD51C,RNASEH2B,ATR,BLM,ERCC6,GTF2E2,CAVIN1,POT1,DNA2,XRCC2,RTEL1,RFWD3,SMC5,ADAR,POLR3GL,DKC1,SLF2,RNF113A,POLH,EXOSC2,POLR3A,ZMPSTE24,YRDC,XPA,FANCG,PCNA,BRCA2…
GO:0046483	Heterocycle metabolic process	91	2891	0.64	1.85	3.82e-37	9606.ENSP00000013807,9606.ENSP00000166345,9606.ENSP00000219281,9606.ENSP00000221486,9606.ENSP00000224950,9606.ENSP00000229769,9606.ENSP00000235310,9606.ENSP00000256996,9606.ENSP00000259008,9606.ENSP00000261584,9606.ENSP00000261772,9606.ENSP00000262027,9606.ENSP00000265038,9606.ENSP00000265433,9606.ENSP00000267415,9606.ENSP00000267430,9606.ENSP00000273398,9606.ENSP00000274606,9606.ENSP00000278616,…	ERCC1,TRIP13,USB1,RNASEH2A,STN1,FANCE,MAD2L2,DDB2,BRIP1,PALB2,AARS1,MARS1,ERCC8,NBN,TINF2,FANCM,ATP6V1A,NHP2,ATM,XPC,ERCC3,LSM11,NSMCE2,FANCD2,FANCC,SLX4,SPRTN,WRN,RNASEH2C,TERT,ERCC4,FANCI,TYMS,TOP3A,ATRIP,WRAP53,MRE11,TRAIP,FANCF,NOP10,RAD51C,RNASEH2B,ATR,BLM,ERCC6,GTF2E2,CAVIN1,POT1,DNA2,XRCC2,RTEL1,RFWD3,SMC5,ADAR,POLR3GL,DKC1,SLF2,ALDH18A1,RNF113A,POLH,EXOSC2,POLR3A,ZMPSTE24,YRDC,XPA,FANCG,P…
GO:0044260	Cellular macromolecule metabolic process	84	2512	0.67	1.92	5.49e-35	9606.ENSP00000013807,9606.ENSP00000029410,9606.ENSP00000166345,9606.ENSP00000221486,9606.ENSP00000224950,9606.ENSP00000229769,9606.ENSP00000235310,9606.ENSP00000256996,9606.ENSP00000258149,9606.ENSP00000259008,9606.ENSP00000261584,9606.ENSP00000261772,9606.ENSP00000262027,9606.ENSP00000265038,9606.ENSP00000265433,9606.ENSP00000267415,9606.ENSP00000267430,9606.ENSP00000274606,9606.ENSP00000278616,…	ERCC1,B4GALT7,TRIP13,RNASEH2A,STN1,FANCE,MAD2L2,DDB2,MDM2,BRIP1,PALB2,AARS1,MARS1,ERCC8,NBN,TINF2,FANCM,NHP2,ATM,XPC,ERCC3,NSMCE2,FANCD2,FANCC,SLX4,SPRTN,WRN,H1-4,RNASEH2C,TERT,ERCC4,FANCI,TYMS,TOP3A,ATRIP,WRAP53,MRE11,TRAIP,FANCF,NOP10,RAD51C,RNASEH2B,ANAPC1,ATR,BLM,ERCC6,POT1,DNA2,XRCC2,RTEL1,RFWD3,SMC5,DKC1,SLF2,RNF113A,POLH,EXOSC2,ZMPSTE24,XPA,FANCG,PCNA,B3GALT6,BRCA2,FANCA,ERCC2,RBBP8,FANCL,…
GO:0000723	Telomere maintenance	30	97	1.63	6.71	1.79e-34	9606.ENSP00000013807,9606.ENSP00000224950,9606.ENSP00000235310,9606.ENSP00000265433,9606.ENSP00000267415,9606.ENSP00000274606,9606.ENSP00000278616,9606.ENSP00000287437,9606.ENSP00000294008,9606.ENSP00000298139,9606.ENSP00000309572,9606.ENSP00000310520,9606.ENSP00000324203,9606.ENSP00000325863,9606.ENSP00000332198,9606.ENSP00000336701,9606.ENSP00000343741,9606.ENSP00000347232,9606.ENSP00000350249,…	ERCC1,STN1,MAD2L2,NBN,TINF2,NHP2,ATM,NSMCE2,SLX4,WRN,TERT,ERCC4,WRAP53,MRE11,NOP10,RAD51C,ATR,BLM,POT1,DNA2,RTEL1,SMC5,DKC1,PCNA,BRCA2,RECQL4,ACD,RAD51,DCLRE1B,CTC1
GO:1901360	Organic cyclic compound metabolic process	91	3181	0.6	1.68	5.34e-34	9606.ENSP00000013807,9606.ENSP00000166345,9606.ENSP00000219281,9606.ENSP00000221486,9606.ENSP00000224950,9606.ENSP00000229769,9606.ENSP00000235310,9606.ENSP00000256996,9606.ENSP00000259008,9606.ENSP00000261584,9606.ENSP00000261772,9606.ENSP00000262027,9606.ENSP00000265038,9606.ENSP00000265433,9606.ENSP00000267415,9606.ENSP00000267430,9606.ENSP00000273398,9606.ENSP00000274606,9606.ENSP00000278616,…	ERCC1,TRIP13,USB1,RNASEH2A,STN1,FANCE,MAD2L2,DDB2,BRIP1,PALB2,AARS1,MARS1,ERCC8,NBN,TINF2,FANCM,ATP6V1A,NHP2,ATM,XPC,ERCC3,LSM11,NSMCE2,FANCD2,FANCC,SLX4,SPRTN,WRN,RNASEH2C,TERT,ERCC4,FANCI,TYMS,TOP3A,ATRIP,WRAP53,MRE11,TRAIP,FANCF,NOP10,RAD51C,RNASEH2B,ATR,BLM,ERCC6,GTF2E2,CAVIN1,POT1,DNA2,XRCC2,RTEL1,RFWD3,SMC5,ADAR,POLR3GL,DKC1,SLF2,ALDH18A1,RNF113A,POLH,EXOSC2,POLR3A,ZMPSTE24,YRDC,XPA,FANCG,P…
GO:0006302	Double-strand break repair	34	204	1.36	5.07	1.27e-31	9606.ENSP00000013807,9606.ENSP00000166345,9606.ENSP00000235310,9606.ENSP00000259008,9606.ENSP00000261584,9606.ENSP00000265038,9606.ENSP00000265433,9606.ENSP00000267430,9606.ENSP00000278616,9606.ENSP00000287437,9606.ENSP00000287647,9606.ENSP00000294008,9606.ENSP00000298139,9606.ENSP00000310520,9606.ENSP00000321636,9606.ENSP00000325863,9606.ENSP00000336701,9606.ENSP00000347232,9606.ENSP00000348089,…	ERCC1,TRIP13,MAD2L2,BRIP1,PALB2,ERCC8,NBN,FANCM,ATM,NSMCE2,FANCD2,SLX4,WRN,ERCC4,TOP3A,MRE11,RAD51C,BLM,ERCC6,DNA2,XRCC2,RFWD3,SMC5,SLF2,BRCA2,RBBP8,RECQL,BRCA1,RECQL4,SAMHD1,RAD51,DCLRE1B,FANCB,ERCC5
GO:0034641	Cellular nitrogen compound metabolic process	90	3463	0.56	1.52	2.92e-30	9606.ENSP00000013807,9606.ENSP00000166345,9606.ENSP00000219281,9606.ENSP00000221486,9606.ENSP00000224950,9606.ENSP00000229769,9606.ENSP00000235310,9606.ENSP00000256996,9606.ENSP00000259008,9606.ENSP00000261584,9606.ENSP00000261772,9606.ENSP00000262027,9606.ENSP00000265038,9606.ENSP00000265433,9606.ENSP00000267415,9606.ENSP00000267430,9606.ENSP00000273398,9606.ENSP00000274606,9606.ENSP00000278616,…	ERCC1,TRIP13,USB1,RNASEH2A,STN1,FANCE,MAD2L2,DDB2,BRIP1,PALB2,AARS1,MARS1,ERCC8,NBN,TINF2,FANCM,ATP6V1A,NHP2,ATM,XPC,ERCC3,LSM11,NSMCE2,FANCD2,FANCC,SLX4,SPRTN,WRN,RNASEH2C,TERT,ERCC4,FANCI,TYMS,TOP3A,ATRIP,WRAP53,MRE11,TRAIP,FANCF,NOP10,RAD51C,RNASEH2B,CAV1,ATR,BLM,ERCC6,GTF2E2,CAVIN1,POT1,DNA2,XRCC2,RTEL1,RFWD3,SMC5,ADAR,POLR3GL,DKC1,SLF2,RNF113A,POLH,EXOSC2,POLR3A,ZMPSTE24,YRDC,XPA,FANCG,PCNA,…
GO:0006310	DNA recombination	31	235	1.26	4.07	7.9e-26	9606.ENSP00000013807,9606.ENSP00000166345,9606.ENSP00000259008,9606.ENSP00000261584,9606.ENSP00000265433,9606.ENSP00000267430,9606.ENSP00000278616,9606.ENSP00000287437,9606.ENSP00000287647,9606.ENSP00000294008,9606.ENSP00000298139,9606.ENSP00000310520,9606.ENSP00000321636,9606.ENSP00000325863,9606.ENSP00000336701,9606.ENSP00000347232,9606.ENSP00000352271,9606.ENSP00000353332,9606.ENSP00000354361,…	ERCC1,TRIP13,BRIP1,PALB2,NBN,FANCM,ATM,NSMCE2,FANCD2,SLX4,WRN,ERCC4,TOP3A,MRE11,RAD51C,BLM,XRCC2,RTEL1,RFWD3,SMC5,SLF2,BRCA2,RBBP8,RECQL,BRCA1,RECQL4,TREX1,SAMHD1,RAD51,FANCB,ERCC5
GO:0000724	Double-strand break repair via homologous recombination	25	114	1.48	4.84	3.13e-25	9606.ENSP00000261584,9606.ENSP00000265433,9606.ENSP00000267430,9606.ENSP00000278616,9606.ENSP00000287437,9606.ENSP00000294008,9606.ENSP00000298139,9606.ENSP00000310520,9606.ENSP00000321636,9606.ENSP00000325863,9606.ENSP00000336701,9606.ENSP00000347232,9606.ENSP00000352271,9606.ENSP00000354361,9606.ENSP00000354957,9606.ENSP00000359292,9606.ENSP00000369497,9606.ENSP00000382628,9606.ENSP00000416739,…	PALB2,NBN,FANCM,ATM,NSMCE2,SLX4,WRN,ERCC4,TOP3A,MRE11,RAD51C,BLM,XRCC2,RFWD3,SMC5,SLF2,BRCA2,RBBP8,RECQL,BRCA1,RECQL4,SAMHD1,RAD51,FANCB,ERCC5
GO:0051052	Regulation of DNA metabolic process	39	541	1	2.92	2.97e-24	9606.ENSP00000013807,9606.ENSP00000224950,9606.ENSP00000235310,9606.ENSP00000265038,9606.ENSP00000265433,9606.ENSP00000267415,9606.ENSP00000275493,9606.ENSP00000278616,9606.ENSP00000287437,9606.ENSP00000294008,9606.ENSP00000298139,9606.ENSP00000307705,9606.ENSP00000310520,9606.ENSP00000323099,9606.ENSP00000324203,9606.ENSP00000325863,9606.ENSP00000330382,9606.ENSP00000343741,9606.ENSP00000347232,…	ERCC1,STN1,MAD2L2,ERCC8,NBN,TINF2,EGFR,ATM,NSMCE2,SLX4,WRN,H1-4,ERCC4,ATRIP,WRAP53,MRE11,PDGFB,ATR,BLM,ERCC6,POT1,DNA2,RTEL1,SMC5,LMNA,DKC1,SLF2,POLH,ZMPSTE24,PCNA,BRCA2,ERCC2,RBBP8,PARN,BRCA1,ACD,RAD51,FANCB,CTC1
GO:0044237	Cellular metabolic process	110	6568	0.37	1.01	7.6e-24	9606.ENSP00000013807,9606.ENSP00000029410,9606.ENSP00000166345,9606.ENSP00000219281,9606.ENSP00000221486,9606.ENSP00000224950,9606.ENSP00000229769,9606.ENSP00000235310,9606.ENSP00000256996,9606.ENSP00000258149,9606.ENSP00000259008,9606.ENSP00000261584,9606.ENSP00000261772,9606.ENSP00000262027,9606.ENSP00000265038,9606.ENSP00000265433,9606.ENSP00000267415,9606.ENSP00000267430,9606.ENSP00000270861,…	ERCC1,B4GALT7,TRIP13,USB1,RNASEH2A,STN1,FANCE,MAD2L2,DDB2,MDM2,BRIP1,PALB2,AARS1,MARS1,ERCC8,NBN,TINF2,FANCM,PLK4,ATP6V1A,NHP2,EGFR,ATM,XPC,ERCC3,LSM11,NSMCE2,BUB1B,FANCD2,FANCC,PCYT1A,SLX4,SPRTN,WRN,H1-4,RNASEH2C,TERT,ERCC4,FANCI,TYMS,TOP3A,ATRIP,WRAP53,MRE11,TRAIP,PDGFB,FANCF,NOP10,RAD51C,RNASEH2B,ANAPC1,CAV1,ATR,DMPK,BLM,ERCC6,GTF2E2,CAVIN1,POT1,DNA2,XRCC2,RTEL1,RFWD3,SMC5,DDR2,LMNA,ADAR,POLR3…
GO:0006950	Response to stress	81	3358	0.52	1.37	9.83e-24	9606.ENSP00000013807,9606.ENSP00000166345,9606.ENSP00000221486,9606.ENSP00000229769,9606.ENSP00000235310,9606.ENSP00000256996,9606.ENSP00000258149,9606.ENSP00000259008,9606.ENSP00000261584,9606.ENSP00000265038,9606.ENSP00000265433,9606.ENSP00000267430,9606.ENSP00000275493,9606.ENSP00000278616,9606.ENSP00000285021,9606.ENSP00000285398,9606.ENSP00000287437,9606.ENSP00000287647,9606.ENSP00000289081,…	ERCC1,TRIP13,RNASEH2A,FANCE,MAD2L2,DDB2,MDM2,BRIP1,PALB2,ERCC8,NBN,FANCM,EGFR,ATM,XPC,ERCC3,NSMCE2,FANCD2,FANCC,SLX4,SPRTN,WRN,RNASEH2C,TERT,ERCC4,FANCI,TOP3A,ATRIP,WRAP53,MRE11,TRAIP,PDGFB,FANCF,CEP63,RAD51C,RNASEH2B,CAV1,ATR,BLM,ERCC6,DNA2,TOMM7,XRCC2,RTEL1,RFWD3,SMC5,DDR2,LMNA,ADAR,SLF2,RNF113A,POLH,POLR3A,ZMPSTE24,XPA,FANCG,PCNA,BRCA2,FANCA,ERCC2,RBBP8,PYCR1,FANCL,ACVR1,RECQL,BRCA1,PIK3R1,SLC…
GO:0010564	Regulation of cell cycle process	42	716	0.91	2.54	3.86e-23	9606.ENSP00000166345,9606.ENSP00000235310,9606.ENSP00000258149,9606.ENSP00000259008,9606.ENSP00000265433,9606.ENSP00000270861,9606.ENSP00000275493,9606.ENSP00000278616,9606.ENSP00000285021,9606.ENSP00000285398,9606.ENSP00000286307,9606.ENSP00000287437,9606.ENSP00000287598,9606.ENSP00000287647,9606.ENSP00000309572,9606.ENSP00000323099,9606.ENSP00000325863,9606.ENSP00000330382,9606.ENSP00000334767,…	TRIP13,MAD2L2,MDM2,BRIP1,NBN,PLK4,EGFR,ATM,XPC,ERCC3,LSM11,NSMCE2,BUB1B,FANCD2,TERT,ATRIP,MRE11,PDGFB,CENATAC,CEP63,RAD51C,RNASEH2B,ANAPC1,ATR,CDK5RAP2,BLM,ERCC6,DNA2,RFWD3,SMC5,DDR2,SLF2,ZMPSTE24,BRCA2,CPAP,ERCC2,RBBP8,ACVR1,BRCA1,TREX1,RAD51,CTC1
GO:1901987	Regulation of cell cycle phase transition	35	431	1.05	3.04	4.06e-23	9606.ENSP00000166345,9606.ENSP00000235310,9606.ENSP00000258149,9606.ENSP00000259008,9606.ENSP00000265433,9606.ENSP00000275493,9606.ENSP00000278616,9606.ENSP00000285021,9606.ENSP00000285398,9606.ENSP00000286307,9606.ENSP00000287437,9606.ENSP00000287598,9606.ENSP00000287647,9606.ENSP00000309572,9606.ENSP00000323099,9606.ENSP00000325863,9606.ENSP00000336524,9606.ENSP00000336701,9606.ENSP00000337623,…	TRIP13,MAD2L2,MDM2,BRIP1,NBN,EGFR,ATM,XPC,ERCC3,LSM11,NSMCE2,BUB1B,FANCD2,TERT,ATRIP,MRE11,CEP63,RAD51C,RNASEH2B,ATR,CDK5RAP2,BLM,ERCC6,DNA2,RFWD3,DDR2,BRCA2,CPAP,ERCC2,RBBP8,ACVR1,BRCA1,TREX1,RAD51,CTC1
GO:0051276	Chromosome organization	47	968	0.83	2.25	4.82e-23	9606.ENSP00000013807,9606.ENSP00000166345,9606.ENSP00000224950,9606.ENSP00000235310,9606.ENSP00000259008,9606.ENSP00000265433,9606.ENSP00000267415,9606.ENSP00000267430,9606.ENSP00000274606,9606.ENSP00000278616,9606.ENSP00000285398,9606.ENSP00000287437,9606.ENSP00000287598,9606.ENSP00000287647,9606.ENSP00000294008,9606.ENSP00000298139,9606.ENSP00000307705,9606.ENSP00000309572,9606.ENSP00000310520,…	ERCC1,TRIP13,STN1,MAD2L2,BRIP1,NBN,TINF2,FANCM,NHP2,ATM,ERCC3,NSMCE2,BUB1B,FANCD2,SLX4,WRN,H1-4,TERT,ERCC4,TOP3A,WRAP53,MRE11,NOP10,RAD51C,ATR,BLM,ERCC6,POT1,DNA2,RTEL1,SMC5,LMNA,DKC1,ZMPSTE24,XPA,PCNA,BRCA2,ERCC2,RECQL,BRCA1,BANF1,RECQL4,ACD,TREX1,RAD51,DCLRE1B,CTC1
GO:0043170	Macromolecule metabolic process	102	5781	0.39	1.05	1.9e-22	9606.ENSP00000013807,9606.ENSP00000029410,9606.ENSP00000166345,9606.ENSP00000219281,9606.ENSP00000221486,9606.ENSP00000224950,9606.ENSP00000229769,9606.ENSP00000235310,9606.ENSP00000256996,9606.ENSP00000258149,9606.ENSP00000259008,9606.ENSP00000261584,9606.ENSP00000261772,9606.ENSP00000262027,9606.ENSP00000265038,9606.ENSP00000265433,9606.ENSP00000267415,9606.ENSP00000267430,9606.ENSP00000270861,…	ERCC1,B4GALT7,TRIP13,USB1,RNASEH2A,STN1,FANCE,MAD2L2,DDB2,MDM2,BRIP1,PALB2,AARS1,MARS1,ERCC8,NBN,TINF2,FANCM,PLK4,NHP2,EGFR,ATM,XPC,ERCC3,LSM11,NSMCE2,FANCD2,FANCC,SLX4,SPRTN,WRN,H1-4,RNASEH2C,TERT,ERCC4,FANCI,TYMS,TOP3A,ATRIP,WRAP53,MRE11,TRAIP,PDGFB,FANCF,NOP10,RAD51C,RNASEH2B,ANAPC1,CAV1,ATR,DMPK,BLM,ERCC6,GTF2E2,CAVIN1,POT1,DNA2,XRCC2,RTEL1,RFWD3,SMC5,DDR2,ADAR,POLR3GL,DKC1,SLF2,RNF113A,POLH,…
GO:0036297	Interstrand cross-link repair	18	41	1.78	5.16	2.53e-22	9606.ENSP00000013807,9606.ENSP00000229769,9606.ENSP00000267430,9606.ENSP00000287647,9606.ENSP00000289081,9606.ENSP00000294008,9606.ENSP00000310520,9606.ENSP00000310842,9606.ENSP00000330875,9606.ENSP00000343741,9606.ENSP00000354361,9606.ENSP00000364270,9606.ENSP00000367910,9606.ENSP00000373952,9606.ENSP00000385021,9606.ENSP00000493712,9606.ENSP00000498042,9606.ENSP00000498215	ERCC1,FANCE,FANCM,FANCD2,FANCC,SLX4,ERCC4,FANCI,FANCF,ATR,RFWD3,XPA,FANCG,FANCA,FANCL,RAD51,DCLRE1B,FANCB
GO:0006807	Nitrogen compound metabolic process	108	6643	0.35	0.98	6.52e-22	9606.ENSP00000013807,9606.ENSP00000029410,9606.ENSP00000166345,9606.ENSP00000219281,9606.ENSP00000221486,9606.ENSP00000224950,9606.ENSP00000229769,9606.ENSP00000235310,9606.ENSP00000256996,9606.ENSP00000258149,9606.ENSP00000259008,9606.ENSP00000261584,9606.ENSP00000261772,9606.ENSP00000262027,9606.ENSP00000265038,9606.ENSP00000265433,9606.ENSP00000267415,9606.ENSP00000267430,9606.ENSP00000270861,…	ERCC1,B4GALT7,TRIP13,USB1,RNASEH2A,STN1,FANCE,MAD2L2,DDB2,MDM2,BRIP1,PALB2,AARS1,MARS1,ERCC8,NBN,TINF2,FANCM,PLK4,ATP6V1A,NHP2,EGFR,ATM,XPC,ERCC3,LSM11,NSMCE2,FANCD2,FANCC,PCYT1A,SLX4,SPRTN,WRN,H1-4,RNASEH2C,TERT,ERCC4,FANCI,TYMS,TOP3A,ATRIP,WRAP53,MRE11,TRAIP,PDGFB,FANCF,NOP10,RAD51C,RNASEH2B,ANAPC1,CAV1,ATR,DMPK,BLM,ERCC6,GTF2E2,CAVIN1,POT1,DNA2,XRCC2,RTEL1,RFWD3,SMC5,DDR2,ADAR,POLR3GL,DKC1,SLF…
GO:0044238	Primary metabolic process	111	7156	0.33	0.93	2.42e-21	9606.ENSP00000013807,9606.ENSP00000029410,9606.ENSP00000166345,9606.ENSP00000219281,9606.ENSP00000221486,9606.ENSP00000224950,9606.ENSP00000229769,9606.ENSP00000235310,9606.ENSP00000256996,9606.ENSP00000258149,9606.ENSP00000259008,9606.ENSP00000261584,9606.ENSP00000261772,9606.ENSP00000262027,9606.ENSP00000265038,9606.ENSP00000265433,9606.ENSP00000267415,9606.ENSP00000267430,9606.ENSP00000270861,…	ERCC1,B4GALT7,TRIP13,USB1,RNASEH2A,STN1,FANCE,MAD2L2,DDB2,MDM2,BRIP1,PALB2,AARS1,MARS1,ERCC8,NBN,TINF2,FANCM,PLK4,ATP6V1A,NHP2,EGFR,ATM,XPC,ERCC3,LSM11,NSMCE2,FANCD2,FANCC,PCYT1A,SLX4,SPRTN,WRN,H1-4,RNASEH2C,TERT,ERCC4,FANCI,TYMS,TOP3A,ATRIP,WRAP53,FBN1,MRE11,TRAIP,PDGFB,FANCF,NOP10,RAD51C,RNASEH2B,ANAPC1,CAV1,ATR,DMPK,BLM,ERCC6,GTF2E2,CAVIN1,POT1,DNA2,XRCC2,RTEL1,BSCL2,RFWD3,SMC5,DDR2,ADAR,POLR3…
GO:0051054	Positive regulation of DNA metabolic process	29	304	1.12	3.1	1.36e-20	9606.ENSP00000013807,9606.ENSP00000224950,9606.ENSP00000235310,9606.ENSP00000265038,9606.ENSP00000265433,9606.ENSP00000267415,9606.ENSP00000275493,9606.ENSP00000278616,9606.ENSP00000294008,9606.ENSP00000298139,9606.ENSP00000324203,9606.ENSP00000325863,9606.ENSP00000330382,9606.ENSP00000343741,9606.ENSP00000348089,9606.ENSP00000350249,9606.ENSP00000351185,9606.ENSP00000353332,9606.ENSP00000358563,…	ERCC1,STN1,MAD2L2,ERCC8,NBN,TINF2,EGFR,ATM,SLX4,WRN,WRAP53,MRE11,PDGFB,ATR,ERCC6,POT1,DNA2,RTEL1,DKC1,SLF2,PCNA,ERCC2,RBBP8,PARN,BRCA1,ACD,RAD51,FANCB,CTC1
GO:0071704	Organic substance metabolic process	111	7522	0.31	0.88	2.23e-19	9606.ENSP00000013807,9606.ENSP00000029410,9606.ENSP00000166345,9606.ENSP00000219281,9606.ENSP00000221486,9606.ENSP00000224950,9606.ENSP00000229769,9606.ENSP00000235310,9606.ENSP00000256996,9606.ENSP00000258149,9606.ENSP00000259008,9606.ENSP00000261584,9606.ENSP00000261772,9606.ENSP00000262027,9606.ENSP00000265038,9606.ENSP00000265433,9606.ENSP00000267415,9606.ENSP00000267430,9606.ENSP00000270861,…	ERCC1,B4GALT7,TRIP13,USB1,RNASEH2A,STN1,FANCE,MAD2L2,DDB2,MDM2,BRIP1,PALB2,AARS1,MARS1,ERCC8,NBN,TINF2,FANCM,PLK4,ATP6V1A,NHP2,EGFR,ATM,XPC,ERCC3,LSM11,NSMCE2,FANCD2,FANCC,PCYT1A,SLX4,SPRTN,WRN,H1-4,RNASEH2C,TERT,ERCC4,FANCI,TYMS,TOP3A,ATRIP,WRAP53,FBN1,MRE11,TRAIP,PDGFB,FANCF,NOP10,RAD51C,RNASEH2B,ANAPC1,CAV1,ATR,DMPK,BLM,ERCC6,GTF2E2,CAVIN1,POT1,DNA2,XRCC2,RTEL1,BSCL2,RFWD3,SMC5,DDR2,ADAR,POLR3…
GO:0008152	Metabolic process	114	7988	0.3	0.86	2.96e-19	9606.ENSP00000013807,9606.ENSP00000029410,9606.ENSP00000166345,9606.ENSP00000219281,9606.ENSP00000221486,9606.ENSP00000224950,9606.ENSP00000229769,9606.ENSP00000235310,9606.ENSP00000256996,9606.ENSP00000258149,9606.ENSP00000259008,9606.ENSP00000261584,9606.ENSP00000261772,9606.ENSP00000262027,9606.ENSP00000265038,9606.ENSP00000265433,9606.ENSP00000267415,9606.ENSP00000267430,9606.ENSP00000270861,…	ERCC1,B4GALT7,TRIP13,USB1,RNASEH2A,STN1,FANCE,MAD2L2,DDB2,MDM2,BRIP1,PALB2,AARS1,MARS1,ERCC8,NBN,TINF2,FANCM,PLK4,ATP6V1A,NHP2,EGFR,ATM,XPC,ERCC3,LSM11,NSMCE2,BUB1B,FANCD2,FANCC,PCYT1A,SLX4,SPRTN,WRN,H1-4,RNASEH2C,TERT,ERCC4,FANCI,TYMS,COG4,TOP3A,ATRIP,WRAP53,FBN1,MRE11,TRAIP,PDGFB,FANCF,NOP10,RAD51C,RNASEH2B,ANAPC1,CAV1,ATR,DMPK,BLM,ERCC6,GTF2E2,CAVIN1,POT1,DNA2,XRCC2,RTEL1,BSCL2,RFWD3,SMC5,DDR2…
GO:0045005	DNA-templated DNA replication maintenance of fidelity	17	54	1.64	4.25	4.78e-19	9606.ENSP00000265433,9606.ENSP00000267430,9606.ENSP00000298139,9606.ENSP00000325863,9606.ENSP00000328203,9606.ENSP00000343741,9606.ENSP00000347232,9606.ENSP00000351185,9606.ENSP00000353332,9606.ENSP00000354361,9606.ENSP00000368458,9606.ENSP00000369497,9606.ENSP00000382628,9606.ENSP00000418960,9606.ENSP00000472445,9606.ENSP00000493536,9606.ENSP00000493712	NBN,FANCM,WRN,MRE11,TRAIP,ATR,BLM,DNA2,RTEL1,RFWD3,PCNA,BRCA2,RBBP8,BRCA1,POLD1,SAMHD1,RAD51
GO:0022402	Cell cycle process	40	835	0.82	2.07	5.82e-19	9606.ENSP00000013807,9606.ENSP00000166345,9606.ENSP00000235310,9606.ENSP00000258149,9606.ENSP00000259008,9606.ENSP00000265433,9606.ENSP00000267430,9606.ENSP00000270861,9606.ENSP00000278616,9606.ENSP00000285021,9606.ENSP00000287598,9606.ENSP00000287647,9606.ENSP00000294008,9606.ENSP00000298139,9606.ENSP00000310520,9606.ENSP00000321636,9606.ENSP00000325863,9606.ENSP00000336524,9606.ENSP00000336701,…	ERCC1,TRIP13,MAD2L2,MDM2,BRIP1,NBN,FANCM,PLK4,ATM,XPC,BUB1B,FANCD2,SLX4,WRN,ERCC4,TOP3A,MRE11,CEP63,RAD51C,ANAPC1,CDK5RAP2,BLM,DNA2,XRCC2,PCNT,RTEL1,RFWD3,SMC5,LMNA,PCNA,BRCA2,CEP152,CPAP,NIN,FANCA,RBBP8,BRCA1,BANF1,TREX1,RAD51
GO:0031297	Replication fork processing	16	45	1.69	4.24	1.46e-18	9606.ENSP00000265433,9606.ENSP00000267430,9606.ENSP00000298139,9606.ENSP00000325863,9606.ENSP00000328203,9606.ENSP00000343741,9606.ENSP00000347232,9606.ENSP00000351185,9606.ENSP00000353332,9606.ENSP00000354361,9606.ENSP00000368458,9606.ENSP00000369497,9606.ENSP00000382628,9606.ENSP00000418960,9606.ENSP00000493536,9606.ENSP00000493712	NBN,FANCM,WRN,MRE11,TRAIP,ATR,BLM,DNA2,RTEL1,RFWD3,PCNA,BRCA2,RBBP8,BRCA1,SAMHD1,RAD51
GO:0009314	Response to radiation	31	444	0.99	2.52	1.59e-18	9606.ENSP00000013807,9606.ENSP00000256996,9606.ENSP00000258149,9606.ENSP00000265038,9606.ENSP00000275493,9606.ENSP00000278616,9606.ENSP00000285021,9606.ENSP00000285398,9606.ENSP00000287647,9606.ENSP00000295050,9606.ENSP00000298139,9606.ENSP00000310520,9606.ENSP00000343741,9606.ENSP00000347232,9606.ENSP00000348089,9606.ENSP00000352271,9606.ENSP00000354361,9606.ENSP00000361310,9606.ENSP00000361845,…	ERCC1,DDB2,MDM2,ERCC8,EGFR,ATM,XPC,ERCC3,FANCD2,SPRTN,WRN,ERCC4,ATR,BLM,ERCC6,XRCC2,RFWD3,POLH,ZMPSTE24,XPA,FANCG,PCNA,BRCA2,ERCC2,BRCA1,PIK3R1,POLD1,GTF2H5,TREX1,RAD51,ERCC5
GO:0032204	Regulation of telomere maintenance	19	103	1.41	3.55	9.92e-18	9606.ENSP00000013807,9606.ENSP00000224950,9606.ENSP00000265433,9606.ENSP00000267415,9606.ENSP00000278616,9606.ENSP00000287437,9606.ENSP00000294008,9606.ENSP00000310520,9606.ENSP00000325863,9606.ENSP00000343741,9606.ENSP00000350249,9606.ENSP00000353332,9606.ENSP00000354957,9606.ENSP00000357283,9606.ENSP00000358563,9606.ENSP00000359292,9606.ENSP00000387911,9606.ENSP00000483117,9606.ENSP00000498499	ERCC1,STN1,NBN,TINF2,ATM,NSMCE2,SLX4,ERCC4,MRE11,ATR,POT1,RTEL1,SMC5,LMNA,DKC1,SLF2,PARN,ACD,CTC1
GO:0006260	DNA replication	23	203	1.2	3.01	1.6e-17	9606.ENSP00000221486,9606.ENSP00000265433,9606.ENSP00000267430,9606.ENSP00000294008,9606.ENSP00000298139,9606.ENSP00000325863,9606.ENSP00000328203,9606.ENSP00000343741,9606.ENSP00000347232,9606.ENSP00000351185,9606.ENSP00000353332,9606.ENSP00000354361,9606.ENSP00000361310,9606.ENSP00000368458,9606.ENSP00000369497,9606.ENSP00000382628,9606.ENSP00000416739,9606.ENSP00000418960,9606.ENSP00000472445,…	RNASEH2A,NBN,FANCM,SLX4,WRN,MRE11,TRAIP,ATR,BLM,DNA2,RTEL1,RFWD3,POLH,PCNA,BRCA2,RBBP8,RECQL,BRCA1,POLD1,RECQL4,TREX1,SAMHD1,RAD51
GO:0007346	Regulation of mitotic cell cycle	31	493	0.94	2.31	2.57e-17	9606.ENSP00000166345,9606.ENSP00000235310,9606.ENSP00000258149,9606.ENSP00000265433,9606.ENSP00000275493,9606.ENSP00000278616,9606.ENSP00000285021,9606.ENSP00000285398,9606.ENSP00000286307,9606.ENSP00000287437,9606.ENSP00000287598,9606.ENSP00000287647,9606.ENSP00000309572,9606.ENSP00000325863,9606.ENSP00000330382,9606.ENSP00000336701,9606.ENSP00000337623,9606.ENSP00000339109,9606.ENSP00000343818,…	TRIP13,MAD2L2,MDM2,NBN,EGFR,ATM,XPC,ERCC3,LSM11,NSMCE2,BUB1B,FANCD2,TERT,MRE11,PDGFB,RAD51C,RNASEH2B,ANAPC1,CDK5RAP2,BLM,RFWD3,DDR2,ZMPSTE24,BRCA2,CPAP,ERCC2,RBBP8,ACVR1,BRCA1,TREX1,CTC1
GO:0006289	Nucleotide-excision repair	16	57	1.59	3.82	3.06e-17	9606.ENSP00000013807,9606.ENSP00000256996,9606.ENSP00000259008,9606.ENSP00000265038,9606.ENSP00000285021,9606.ENSP00000285398,9606.ENSP00000289081,9606.ENSP00000294008,9606.ENSP00000310520,9606.ENSP00000348089,9606.ENSP00000364270,9606.ENSP00000369497,9606.ENSP00000375809,9606.ENSP00000472445,9606.ENSP00000476100,9606.ENSP00000498881	ERCC1,DDB2,BRIP1,ERCC8,XPC,ERCC3,FANCC,SLX4,ERCC4,ERCC6,XPA,BRCA2,ERCC2,POLD1,GTF2H5,ERCC5
GO:0033044	Regulation of chromosome organization	24	253	1.12	2.73	9.49e-17	9606.ENSP00000013807,9606.ENSP00000166345,9606.ENSP00000224950,9606.ENSP00000235310,9606.ENSP00000265433,9606.ENSP00000267415,9606.ENSP00000278616,9606.ENSP00000287437,9606.ENSP00000287598,9606.ENSP00000294008,9606.ENSP00000310520,9606.ENSP00000325863,9606.ENSP00000339109,9606.ENSP00000343741,9606.ENSP00000343818,9606.ENSP00000350249,9606.ENSP00000353332,9606.ENSP00000354957,9606.ENSP00000357283,…	ERCC1,TRIP13,STN1,MAD2L2,NBN,TINF2,ATM,NSMCE2,BUB1B,SLX4,ERCC4,MRE11,ANAPC1,ATR,CDK5RAP2,POT1,RTEL1,SMC5,LMNA,DKC1,SLF2,PARN,ACD,CTC1
GO:1901990	Regulation of mitotic cell cycle phase transition	26	332	1.04	2.49	2.11e-16	9606.ENSP00000166345,9606.ENSP00000235310,9606.ENSP00000258149,9606.ENSP00000265433,9606.ENSP00000275493,9606.ENSP00000278616,9606.ENSP00000285021,9606.ENSP00000285398,9606.ENSP00000286307,9606.ENSP00000287437,9606.ENSP00000287598,9606.ENSP00000309572,9606.ENSP00000325863,9606.ENSP00000336701,9606.ENSP00000337623,9606.ENSP00000343818,9606.ENSP00000347232,9606.ENSP00000354361,9606.ENSP00000356899,…	TRIP13,MAD2L2,MDM2,NBN,EGFR,ATM,XPC,ERCC3,LSM11,NSMCE2,BUB1B,TERT,MRE11,RAD51C,RNASEH2B,CDK5RAP2,BLM,RFWD3,DDR2,CPAP,ERCC2,RBBP8,ACVR1,BRCA1,TREX1,CTC1
GO:0009411	Response to UV	20	150	1.27	3.04	2.48e-16	9606.ENSP00000013807,9606.ENSP00000256996,9606.ENSP00000265038,9606.ENSP00000275493,9606.ENSP00000285021,9606.ENSP00000285398,9606.ENSP00000295050,9606.ENSP00000298139,9606.ENSP00000310520,9606.ENSP00000343741,9606.ENSP00000348089,9606.ENSP00000361310,9606.ENSP00000364270,9606.ENSP00000368458,9606.ENSP00000369497,9606.ENSP00000375809,9606.ENSP00000428056,9606.ENSP00000472445,9606.ENSP00000486676,…	ERCC1,DDB2,ERCC8,EGFR,XPC,ERCC3,SPRTN,WRN,ERCC4,ATR,ERCC6,POLH,XPA,PCNA,BRCA2,ERCC2,PIK3R1,POLD1,TREX1,ERCC5
GO:0000075	Cell cycle checkpoint signaling	20	157	1.25	2.95	5.47e-16	9606.ENSP00000166345,9606.ENSP00000235310,9606.ENSP00000258149,9606.ENSP00000259008,9606.ENSP00000265433,9606.ENSP00000278616,9606.ENSP00000285021,9606.ENSP00000287598,9606.ENSP00000287647,9606.ENSP00000323099,9606.ENSP00000325863,9606.ENSP00000336524,9606.ENSP00000343741,9606.ENSP00000347232,9606.ENSP00000348089,9606.ENSP00000351185,9606.ENSP00000354361,9606.ENSP00000382628,9606.ENSP00000418960,…	TRIP13,MAD2L2,MDM2,BRIP1,NBN,ATM,XPC,BUB1B,FANCD2,ATRIP,MRE11,CEP63,ATR,BLM,ERCC6,DNA2,RFWD3,RBBP8,BRCA1,TREX1
GO:0006996	Organelle organization	71	3470	0.45	1.09	7.43e-16	9606.ENSP00000013807,9606.ENSP00000166345,9606.ENSP00000224950,9606.ENSP00000235310,9606.ENSP00000238892,9606.ENSP00000249442,9606.ENSP00000259008,9606.ENSP00000265433,9606.ENSP00000267415,9606.ENSP00000267430,9606.ENSP00000270861,9606.ENSP00000273398,9606.ENSP00000274606,9606.ENSP00000278616,9606.ENSP00000285398,9606.ENSP00000287437,9606.ENSP00000287598,9606.ENSP00000287647,9606.ENSP00000293760,…	ERCC1,TRIP13,STN1,MAD2L2,CRIPT,MTX2,BRIP1,NBN,TINF2,FANCM,PLK4,ATP6V1A,NHP2,ATM,ERCC3,NSMCE2,BUB1B,FANCD2,LEMD2,SLX4,WRN,ANTXR1,H1-4,TERT,ERCC4,COG4,CEP57,TOP3A,WRAP53,MRE11,NOP10,CEP63,RAD51C,CAV1,ATR,CDK5RAP2,DMPK,BLM,ERCC6,POT1,DNA2,TOMM7,ELN,XRCC2,PCNT,RTEL1,BSCL2,SMC5,GORAB,LMNA,DKC1,ZMPSTE24,XPA,FANCG,PCNA,BRCA2,CEP152,CPAP,NIN,FANCA,ERCC2,RECQL,BRCA1,BANF1,TOR1AIP1,RECQL4,ACD,TREX1,RAD51,D…
GO:0006261	DNA-templated DNA replication	19	137	1.28	3	9.42e-16	9606.ENSP00000265433,9606.ENSP00000267430,9606.ENSP00000298139,9606.ENSP00000325863,9606.ENSP00000328203,9606.ENSP00000343741,9606.ENSP00000347232,9606.ENSP00000351185,9606.ENSP00000353332,9606.ENSP00000354361,9606.ENSP00000368458,9606.ENSP00000369497,9606.ENSP00000382628,9606.ENSP00000416739,9606.ENSP00000418960,9606.ENSP00000472445,9606.ENSP00000482313,9606.ENSP00000493536,9606.ENSP00000493712	NBN,FANCM,WRN,MRE11,TRAIP,ATR,BLM,DNA2,RTEL1,RFWD3,PCNA,BRCA2,RBBP8,RECQL,BRCA1,POLD1,RECQL4,SAMHD1,RAD51
GO:0007049	Cell cycle	43	1246	0.68	1.56	1.38e-15	9606.ENSP00000013807,9606.ENSP00000166345,9606.ENSP00000235310,9606.ENSP00000258149,9606.ENSP00000259008,9606.ENSP00000265433,9606.ENSP00000267430,9606.ENSP00000270861,9606.ENSP00000278616,9606.ENSP00000285021,9606.ENSP00000287437,9606.ENSP00000287598,9606.ENSP00000287647,9606.ENSP00000294008,9606.ENSP00000298139,9606.ENSP00000304553,9606.ENSP00000310520,9606.ENSP00000310842,9606.ENSP00000321636,…	ERCC1,TRIP13,MAD2L2,MDM2,BRIP1,NBN,FANCM,PLK4,ATM,XPC,NSMCE2,BUB1B,FANCD2,SLX4,WRN,MPLKIP,ERCC4,FANCI,TOP3A,MRE11,CEP63,RAD51C,ANAPC1,CDK5RAP2,BLM,DNA2,XRCC2,PCNT,RTEL1,RFWD3,SMC5,LMNA,PCNA,BRCA2,CEP152,CPAP,NIN,FANCA,RBBP8,BRCA1,BANF1,TREX1,RAD51
GO:0010948	Negative regulation of cell cycle process	23	272	1.07	2.44	4.96e-15	9606.ENSP00000166345,9606.ENSP00000235310,9606.ENSP00000258149,9606.ENSP00000259008,9606.ENSP00000265433,9606.ENSP00000278616,9606.ENSP00000285021,9606.ENSP00000287598,9606.ENSP00000287647,9606.ENSP00000323099,9606.ENSP00000325863,9606.ENSP00000334767,9606.ENSP00000336524,9606.ENSP00000343741,9606.ENSP00000343818,9606.ENSP00000347232,9606.ENSP00000348089,9606.ENSP00000351185,9606.ENSP00000354361,…	TRIP13,MAD2L2,MDM2,BRIP1,NBN,ATM,XPC,BUB1B,FANCD2,ATRIP,MRE11,CENATAC,CEP63,ATR,CDK5RAP2,BLM,ERCC6,DNA2,RFWD3,RBBP8,ACVR1,BRCA1,TREX1
GO:0071478	Cellular response to radiation	20	183	1.18	2.66	7.55e-15	9606.ENSP00000013807,9606.ENSP00000256996,9606.ENSP00000258149,9606.ENSP00000278616,9606.ENSP00000285021,9606.ENSP00000298139,9606.ENSP00000310520,9606.ENSP00000343741,9606.ENSP00000347232,9606.ENSP00000361310,9606.ENSP00000361845,9606.ENSP00000364270,9606.ENSP00000368458,9606.ENSP00000369497,9606.ENSP00000418960,9606.ENSP00000428056,9606.ENSP00000472445,9606.ENSP00000476100,9606.ENSP00000486676,…	ERCC1,DDB2,MDM2,ATM,XPC,WRN,ERCC4,ATR,BLM,POLH,ZMPSTE24,XPA,PCNA,BRCA2,BRCA1,PIK3R1,POLD1,GTF2H5,TREX1,RAD51
GO:2001020	Regulation of response to DNA damage stimulus	24	316	1.02	2.31	8.71e-15	9606.ENSP00000013807,9606.ENSP00000235310,9606.ENSP00000258149,9606.ENSP00000265038,9606.ENSP00000275493,9606.ENSP00000278616,9606.ENSP00000310520,9606.ENSP00000323099,9606.ENSP00000324203,9606.ENSP00000337623,9606.ENSP00000343741,9606.ENSP00000348089,9606.ENSP00000350249,9606.ENSP00000353332,9606.ENSP00000354361,9606.ENSP00000359292,9606.ENSP00000361310,9606.ENSP00000361845,9606.ENSP00000368458,…	ERCC1,MAD2L2,MDM2,ERCC8,EGFR,ATM,ERCC4,ATRIP,WRAP53,RNASEH2B,ATR,ERCC6,POT1,RTEL1,RFWD3,SLF2,POLH,ZMPSTE24,PCNA,BRCA2,RBBP8,BRCA1,RAD51,FANCB
GO:0071897	DNA biosynthetic process	16	92	1.38	2.98	1.82e-14	9606.ENSP00000235310,9606.ENSP00000274606,9606.ENSP00000295050,9606.ENSP00000298139,9606.ENSP00000309572,9606.ENSP00000315644,9606.ENSP00000324203,9606.ENSP00000325863,9606.ENSP00000332198,9606.ENSP00000350249,9606.ENSP00000358563,9606.ENSP00000361310,9606.ENSP00000368458,9606.ENSP00000472445,9606.ENSP00000483117,9606.ENSP00000486676	MAD2L2,NHP2,SPRTN,WRN,TERT,TYMS,WRAP53,MRE11,NOP10,POT1,DKC1,POLH,PCNA,POLD1,ACD,TREX1
GO:0090305	Nucleic acid phosphodiester bond hydrolysis	22	257	1.07	2.39	1.92e-14	9606.ENSP00000013807,9606.ENSP00000219281,9606.ENSP00000221486,9606.ENSP00000267430,9606.ENSP00000274606,9606.ENSP00000285398,9606.ENSP00000298139,9606.ENSP00000310520,9606.ENSP00000323099,9606.ENSP00000325863,9606.ENSP00000336701,9606.ENSP00000351185,9606.ENSP00000361433,9606.ENSP00000364270,9606.ENSP00000375809,9606.ENSP00000382628,9606.ENSP00000387911,9606.ENSP00000472445,9606.ENSP00000486676,…	ERCC1,USB1,RNASEH2A,FANCM,NHP2,ERCC3,WRN,ERCC4,ATRIP,MRE11,RAD51C,DNA2,EXOSC2,XPA,ERCC2,RBBP8,PARN,POLD1,TREX1,SAMHD1,DCLRE1B,ERCC5
GO:1901988	Negative regulation of cell cycle phase transition	21	225	1.11	2.47	2.01e-14	9606.ENSP00000166345,9606.ENSP00000235310,9606.ENSP00000258149,9606.ENSP00000259008,9606.ENSP00000265433,9606.ENSP00000278616,9606.ENSP00000285021,9606.ENSP00000287598,9606.ENSP00000287647,9606.ENSP00000323099,9606.ENSP00000325863,9606.ENSP00000336524,9606.ENSP00000343741,9606.ENSP00000347232,9606.ENSP00000348089,9606.ENSP00000351185,9606.ENSP00000354361,9606.ENSP00000382628,9606.ENSP00000405004,…	TRIP13,MAD2L2,MDM2,BRIP1,NBN,ATM,XPC,BUB1B,FANCD2,ATRIP,MRE11,CEP63,ATR,BLM,ERCC6,DNA2,RFWD3,RBBP8,ACVR1,BRCA1,TREX1
GO:0010833	Telomere maintenance via telomere lengthening	12	30	1.74	3.4	3.06e-14	9606.ENSP00000224950,9606.ENSP00000274606,9606.ENSP00000309572,9606.ENSP00000324203,9606.ENSP00000325863,9606.ENSP00000332198,9606.ENSP00000350249,9606.ENSP00000358563,9606.ENSP00000483117,9606.ENSP00000493712,9606.ENSP00000498042,9606.ENSP00000498499	STN1,NHP2,TERT,WRAP53,MRE11,NOP10,POT1,DKC1,ACD,RAD51,DCLRE1B,CTC1
GO:0009987	Cellular process	141	14826	0.12	0.58	4.84e-14	9606.ENSP00000013807,9606.ENSP00000029410,9606.ENSP00000166345,9606.ENSP00000219281,9606.ENSP00000221486,9606.ENSP00000224950,9606.ENSP00000229769,9606.ENSP00000235310,9606.ENSP00000238892,9606.ENSP00000249442,9606.ENSP00000253413,9606.ENSP00000256996,9606.ENSP00000258149,9606.ENSP00000259008,9606.ENSP00000261584,9606.ENSP00000261772,9606.ENSP00000262027,9606.ENSP00000265038,9606.ENSP00000265433,…	ERCC1,B4GALT7,TRIP13,USB1,RNASEH2A,STN1,FANCE,MAD2L2,CRIPT,MTX2,ATP6V1E1,DDB2,MDM2,BRIP1,PALB2,AARS1,MARS1,ERCC8,NBN,TINF2,FANCM,PLK4,ATP6V1A,NHP2,EGFR,ATM,XPC,ERCC3,LSM11,NSMCE2,BUB1B,FANCD2,FANCC,PCYT1A,LEMD2,SLX4,SPRTN,WRN,ANTXR1,MPLKIP,H1-4,RNASEH2C,TERT,EFEMP2,ERCC4,FANCI,LTBP4,TYMS,COG4,CEP57,TOP3A,ATRIP,WRAP53,FBN1,MRE11,TRAIP,PDGFB,FANCF,NOP10,ATP6V0A2,CEP63,RAD51C,RNASEH2B,ANAPC1,CAV1,AT…
GO:0051053	Negative regulation of DNA metabolic process	18	149	1.22	2.63	5.75e-14	9606.ENSP00000013807,9606.ENSP00000224950,9606.ENSP00000235310,9606.ENSP00000265433,9606.ENSP00000267415,9606.ENSP00000278616,9606.ENSP00000294008,9606.ENSP00000307705,9606.ENSP00000310520,9606.ENSP00000343741,9606.ENSP00000347232,9606.ENSP00000348089,9606.ENSP00000350249,9606.ENSP00000353332,9606.ENSP00000369497,9606.ENSP00000483117,9606.ENSP00000498215,9606.ENSP00000498499	ERCC1,STN1,MAD2L2,NBN,TINF2,ATM,SLX4,H1-4,ERCC4,ATR,BLM,ERCC6,POT1,RTEL1,BRCA2,ACD,FANCB,CTC1
GO:0071103	DNA conformation change	16	104	1.33	2.78	9.22e-14	9606.ENSP00000259008,9606.ENSP00000265433,9606.ENSP00000267430,9606.ENSP00000285398,9606.ENSP00000298139,9606.ENSP00000321636,9606.ENSP00000325863,9606.ENSP00000347232,9606.ENSP00000350249,9606.ENSP00000351185,9606.ENSP00000353332,9606.ENSP00000375809,9606.ENSP00000416739,9606.ENSP00000482313,9606.ENSP00000486676,9606.ENSP00000493712	BRIP1,NBN,FANCM,ERCC3,WRN,TOP3A,MRE11,BLM,POT1,DNA2,RTEL1,ERCC2,RECQL,RECQL4,TREX1,RAD51
GO:0009628	Response to abiotic stimulus	38	1107	0.68	1.47	1.91e-13	9606.ENSP00000013807,9606.ENSP00000256996,9606.ENSP00000258149,9606.ENSP00000259008,9606.ENSP00000265038,9606.ENSP00000273398,9606.ENSP00000275493,9606.ENSP00000278616,9606.ENSP00000285021,9606.ENSP00000285398,9606.ENSP00000287647,9606.ENSP00000295050,9606.ENSP00000298139,9606.ENSP00000309572,9606.ENSP00000310520,9606.ENSP00000332247,9606.ENSP00000339191,9606.ENSP00000343741,9606.ENSP00000347232,…	ERCC1,DDB2,MDM2,BRIP1,ERCC8,ATP6V1A,EGFR,ATM,XPC,ERCC3,FANCD2,SPRTN,WRN,TERT,ERCC4,ATP6V0A2,CAV1,ATR,BLM,ERCC6,XRCC2,RFWD3,DDR2,LMNA,POLH,ZMPSTE24,XPA,FANCG,PCNA,BRCA2,ERCC2,BRCA1,PIK3R1,POLD1,GTF2H5,TREX1,RAD51,ERCC5
GO:0042770	Signal transduction in response to DNA damage	17	135	1.24	2.58	2.08e-13	9606.ENSP00000235310,9606.ENSP00000258149,9606.ENSP00000259008,9606.ENSP00000265433,9606.ENSP00000278616,9606.ENSP00000285021,9606.ENSP00000287647,9606.ENSP00000323099,9606.ENSP00000325863,9606.ENSP00000336524,9606.ENSP00000343741,9606.ENSP00000347232,9606.ENSP00000348089,9606.ENSP00000354361,9606.ENSP00000369497,9606.ENSP00000418960,9606.ENSP00000486676	MAD2L2,MDM2,BRIP1,NBN,ATM,XPC,FANCD2,ATRIP,MRE11,CEP63,ATR,BLM,ERCC6,RFWD3,BRCA2,BRCA1,TREX1
GO:0032508	DNA duplex unwinding	15	89	1.37	2.78	2.29e-13	9606.ENSP00000259008,9606.ENSP00000265433,9606.ENSP00000267430,9606.ENSP00000285398,9606.ENSP00000298139,9606.ENSP00000325863,9606.ENSP00000347232,9606.ENSP00000350249,9606.ENSP00000351185,9606.ENSP00000353332,9606.ENSP00000375809,9606.ENSP00000416739,9606.ENSP00000482313,9606.ENSP00000486676,9606.ENSP00000493712	BRIP1,NBN,FANCM,ERCC3,WRN,MRE11,BLM,POT1,DNA2,RTEL1,ERCC2,RECQL,RECQL4,TREX1,RAD51
GO:0031570	DNA integrity checkpoint signaling	16	113	1.29	2.65	2.8e-13	9606.ENSP00000258149,9606.ENSP00000259008,9606.ENSP00000265433,9606.ENSP00000278616,9606.ENSP00000285021,9606.ENSP00000287647,9606.ENSP00000323099,9606.ENSP00000325863,9606.ENSP00000336524,9606.ENSP00000343741,9606.ENSP00000347232,9606.ENSP00000348089,9606.ENSP00000351185,9606.ENSP00000354361,9606.ENSP00000418960,9606.ENSP00000486676	MDM2,BRIP1,NBN,ATM,XPC,FANCD2,ATRIP,MRE11,CEP63,ATR,BLM,ERCC6,DNA2,RFWD3,BRCA1,TREX1
GO:0010212	Response to ionizing radiation	17	143	1.22	2.49	4.73e-13	9606.ENSP00000013807,9606.ENSP00000258149,9606.ENSP00000265038,9606.ENSP00000278616,9606.ENSP00000287647,9606.ENSP00000298139,9606.ENSP00000343741,9606.ENSP00000347232,9606.ENSP00000348089,9606.ENSP00000352271,9606.ENSP00000354361,9606.ENSP00000361845,9606.ENSP00000369497,9606.ENSP00000418960,9606.ENSP00000476100,9606.ENSP00000486676,9606.ENSP00000493712	ERCC1,MDM2,ERCC8,ATM,FANCD2,WRN,ATR,BLM,ERCC6,XRCC2,RFWD3,ZMPSTE24,BRCA2,BRCA1,GTF2H5,TREX1,RAD51
GO:0051716	Cellular response to stimulus	92	6357	0.3	0.8	6.82e-13	9606.ENSP00000013807,9606.ENSP00000166345,9606.ENSP00000221486,9606.ENSP00000229769,9606.ENSP00000235310,9606.ENSP00000256996,9606.ENSP00000258149,9606.ENSP00000259008,9606.ENSP00000261584,9606.ENSP00000262027,9606.ENSP00000265038,9606.ENSP00000265433,9606.ENSP00000267430,9606.ENSP00000273398,9606.ENSP00000275493,9606.ENSP00000278616,9606.ENSP00000285021,9606.ENSP00000285398,9606.ENSP00000287437,…	ERCC1,TRIP13,RNASEH2A,FANCE,MAD2L2,DDB2,MDM2,BRIP1,PALB2,MARS1,ERCC8,NBN,FANCM,ATP6V1A,EGFR,ATM,XPC,ERCC3,NSMCE2,BUB1B,FANCD2,FANCC,SLX4,SPRTN,WRN,RNASEH2C,TERT,ERCC4,FANCI,LTBP4,CEP57,TOP3A,ATRIP,WRAP53,FBN1,MRE11,TRAIP,PDGFB,FANCF,ATP6V0A2,CEP63,RAD51C,RNASEH2B,CAV1,ATR,DMPK,BLM,ERCC6,DNA2,TOMM7,XRCC2,PCNT,RTEL1,RFWD3,SMC5,DDR2,LMNA,SLF2,RNF113A,POLH,ZMPSTE24,XPA,FANCG,PCNA,BRCA2,CPAP,FANCA,ERC…
GO:0000077	DNA damage checkpoint signaling	15	105	1.3	2.52	1.85e-12	9606.ENSP00000258149,9606.ENSP00000259008,9606.ENSP00000265433,9606.ENSP00000278616,9606.ENSP00000285021,9606.ENSP00000287647,9606.ENSP00000323099,9606.ENSP00000325863,9606.ENSP00000336524,9606.ENSP00000343741,9606.ENSP00000347232,9606.ENSP00000348089,9606.ENSP00000354361,9606.ENSP00000418960,9606.ENSP00000486676	MDM2,BRIP1,NBN,ATM,XPC,FANCD2,ATRIP,MRE11,CEP63,ATR,BLM,ERCC6,RFWD3,BRCA1,TREX1
GO:0035825	Homologous recombination	13	63	1.46	2.73	1.85e-12	9606.ENSP00000166345,9606.ENSP00000259008,9606.ENSP00000265433,9606.ENSP00000267430,9606.ENSP00000278616,9606.ENSP00000287647,9606.ENSP00000294008,9606.ENSP00000310520,9606.ENSP00000325863,9606.ENSP00000336701,9606.ENSP00000382628,9606.ENSP00000418960,9606.ENSP00000493712	TRIP13,BRIP1,NBN,FANCM,ATM,FANCD2,SLX4,ERCC4,MRE11,RAD51C,RBBP8,BRCA1,RAD51
GO:2001251	Negative regulation of chromosome organization	14	84	1.36	2.6	2.2e-12	9606.ENSP00000013807,9606.ENSP00000166345,9606.ENSP00000224950,9606.ENSP00000235310,9606.ENSP00000265433,9606.ENSP00000267415,9606.ENSP00000278616,9606.ENSP00000287598,9606.ENSP00000294008,9606.ENSP00000310520,9606.ENSP00000350249,9606.ENSP00000353332,9606.ENSP00000483117,9606.ENSP00000498499	ERCC1,TRIP13,STN1,MAD2L2,NBN,TINF2,ATM,BUB1B,SLX4,ERCC4,POT1,RTEL1,ACD,CTC1
GO:2001252	Positive regulation of chromosome organization	15	107	1.29	2.5	2.3e-12	9606.ENSP00000013807,9606.ENSP00000265433,9606.ENSP00000267415,9606.ENSP00000278616,9606.ENSP00000287437,9606.ENSP00000294008,9606.ENSP00000325863,9606.ENSP00000343741,9606.ENSP00000350249,9606.ENSP00000353332,9606.ENSP00000354957,9606.ENSP00000358563,9606.ENSP00000359292,9606.ENSP00000387911,9606.ENSP00000483117	ERCC1,NBN,TINF2,ATM,NSMCE2,SLX4,MRE11,ATR,POT1,RTEL1,SMC5,DKC1,SLF2,PARN,ACD
GO:0032205	Negative regulation of telomere maintenance	11	38	1.6	2.74	8.94e-12	9606.ENSP00000013807,9606.ENSP00000224950,9606.ENSP00000265433,9606.ENSP00000267415,9606.ENSP00000278616,9606.ENSP00000294008,9606.ENSP00000310520,9606.ENSP00000350249,9606.ENSP00000353332,9606.ENSP00000483117,9606.ENSP00000498499	ERCC1,STN1,NBN,TINF2,ATM,SLX4,ERCC4,POT1,RTEL1,ACD,CTC1
GO:0010332	Response to gamma radiation	12	55	1.48	2.61	1.08e-11	9606.ENSP00000258149,9606.ENSP00000278616,9606.ENSP00000287647,9606.ENSP00000298139,9606.ENSP00000343741,9606.ENSP00000348089,9606.ENSP00000352271,9606.ENSP00000361845,9606.ENSP00000369497,9606.ENSP00000476100,9606.ENSP00000486676,9606.ENSP00000493712	MDM2,ATM,FANCD2,WRN,ATR,ERCC6,XRCC2,ZMPSTE24,BRCA2,GTF2H5,TREX1,RAD51
GO:0080135	Regulation of cellular response to stress	29	712	0.75	1.5	1.28e-11	9606.ENSP00000013807,9606.ENSP00000235310,9606.ENSP00000258149,9606.ENSP00000265038,9606.ENSP00000275493,9606.ENSP00000278616,9606.ENSP00000310520,9606.ENSP00000323099,9606.ENSP00000324203,9606.ENSP00000337623,9606.ENSP00000339191,9606.ENSP00000343741,9606.ENSP00000345008,9606.ENSP00000348089,9606.ENSP00000350249,9606.ENSP00000353332,9606.ENSP00000354361,9606.ENSP00000356899,9606.ENSP00000359292,…	ERCC1,MAD2L2,MDM2,ERCC8,EGFR,ATM,ERCC4,ATRIP,WRAP53,RNASEH2B,CAV1,ATR,FBLN5,ERCC6,POT1,RTEL1,RFWD3,DDR2,SLF2,POLH,ZMPSTE24,PCNA,BRCA2,RBBP8,PYCR1,BRCA1,PIK3R1,RAD51,FANCB
GO:0016043	Cellular component organization	82	5436	0.32	0.8	1.4e-11	9606.ENSP00000013807,9606.ENSP00000029410,9606.ENSP00000166345,9606.ENSP00000224950,9606.ENSP00000235310,9606.ENSP00000238892,9606.ENSP00000249442,9606.ENSP00000258149,9606.ENSP00000259008,9606.ENSP00000265433,9606.ENSP00000267415,9606.ENSP00000267430,9606.ENSP00000270861,9606.ENSP00000273398,9606.ENSP00000274606,9606.ENSP00000275493,9606.ENSP00000278616,9606.ENSP00000285398,9606.ENSP00000287437,…	ERCC1,B4GALT7,TRIP13,STN1,MAD2L2,CRIPT,MTX2,MDM2,BRIP1,NBN,TINF2,FANCM,PLK4,ATP6V1A,NHP2,EGFR,ATM,ERCC3,NSMCE2,BUB1B,FANCD2,FANCC,LEMD2,SLX4,WRN,ANTXR1,H1-4,TERT,EFEMP2,ERCC4,LTBP4,COG4,CEP57,TOP3A,WRAP53,MRE11,NOP10,CEP63,RAD51C,CAV1,ATR,CDK5RAP2,FBLN5,DMPK,BLM,ERCC6,POT1,DNA2,TOMM7,ELN,XRCC2,PCNT,RTEL1,BSCL2,SMC5,GORAB,DDR2,LMNA,ADAR,DKC1,ZMPSTE24,XPA,FANCG,PCNA,BRCA2,CEP152,CPAP,NIN,FANCA,ERCC…
GO:0071840	Cellular component organization or biogenesis	83	5639	0.31	0.78	3.43e-11	9606.ENSP00000013807,9606.ENSP00000029410,9606.ENSP00000166345,9606.ENSP00000224950,9606.ENSP00000235310,9606.ENSP00000238892,9606.ENSP00000249442,9606.ENSP00000258149,9606.ENSP00000259008,9606.ENSP00000265433,9606.ENSP00000267415,9606.ENSP00000267430,9606.ENSP00000270861,9606.ENSP00000273398,9606.ENSP00000274606,9606.ENSP00000275493,9606.ENSP00000278616,9606.ENSP00000285398,9606.ENSP00000287437,…	ERCC1,B4GALT7,TRIP13,STN1,MAD2L2,CRIPT,MTX2,MDM2,BRIP1,NBN,TINF2,FANCM,PLK4,ATP6V1A,NHP2,EGFR,ATM,ERCC3,NSMCE2,BUB1B,FANCD2,FANCC,LEMD2,SLX4,WRN,ANTXR1,H1-4,TERT,EFEMP2,ERCC4,LTBP4,COG4,CEP57,TOP3A,WRAP53,MRE11,NOP10,CEP63,RAD51C,CAV1,ATR,CDK5RAP2,FBLN5,DMPK,BLM,ERCC6,POT1,DNA2,TOMM7,ELN,XRCC2,PCNT,RTEL1,BSCL2,SMC5,GORAB,DDR2,LMNA,ADAR,DKC1,EXOSC2,ZMPSTE24,XPA,FANCG,PCNA,BRCA2,CEP152,CPAP,NIN,FAN…
GO:1904356	Regulation of telomere maintenance via telomere lengthening	12	64	1.42	2.41	5.01e-11	9606.ENSP00000224950,9606.ENSP00000267415,9606.ENSP00000278616,9606.ENSP00000294008,9606.ENSP00000310520,9606.ENSP00000343741,9606.ENSP00000350249,9606.ENSP00000353332,9606.ENSP00000358563,9606.ENSP00000387911,9606.ENSP00000483117,9606.ENSP00000498499	STN1,TINF2,ATM,SLX4,ERCC4,ATR,POT1,RTEL1,DKC1,PARN,ACD,CTC1
GO:0032206	Positive regulation of telomere maintenance	12	67	1.4	2.36	7.9e-11	9606.ENSP00000013807,9606.ENSP00000265433,9606.ENSP00000267415,9606.ENSP00000278616,9606.ENSP00000294008,9606.ENSP00000325863,9606.ENSP00000343741,9606.ENSP00000350249,9606.ENSP00000353332,9606.ENSP00000358563,9606.ENSP00000387911,9606.ENSP00000483117	ERCC1,NBN,TINF2,ATM,SLX4,MRE11,ATR,POT1,RTEL1,DKC1,PARN,ACD
GO:0051321	Meiotic cell cycle	18	250	1	1.81	1.57e-10	9606.ENSP00000013807,9606.ENSP00000166345,9606.ENSP00000259008,9606.ENSP00000265433,9606.ENSP00000267430,9606.ENSP00000278616,9606.ENSP00000287598,9606.ENSP00000287647,9606.ENSP00000294008,9606.ENSP00000310520,9606.ENSP00000321636,9606.ENSP00000325863,9606.ENSP00000336701,9606.ENSP00000352271,9606.ENSP00000369497,9606.ENSP00000373952,9606.ENSP00000382628,9606.ENSP00000493712	ERCC1,TRIP13,BRIP1,NBN,FANCM,ATM,BUB1B,FANCD2,SLX4,ERCC4,TOP3A,MRE11,RAD51C,XRCC2,BRCA2,FANCA,RBBP8,RAD51
GO:0000278	Mitotic cell cycle	26	631	0.76	1.43	2.12e-10	9606.ENSP00000166345,9606.ENSP00000235310,9606.ENSP00000258149,9606.ENSP00000265433,9606.ENSP00000270861,9606.ENSP00000278616,9606.ENSP00000285021,9606.ENSP00000287598,9606.ENSP00000287647,9606.ENSP00000325863,9606.ENSP00000339109,9606.ENSP00000343818,9606.ENSP00000347232,9606.ENSP00000351185,9606.ENSP00000352271,9606.ENSP00000352572,9606.ENSP00000353332,9606.ENSP00000354361,9606.ENSP00000354957,…	TRIP13,MAD2L2,MDM2,NBN,PLK4,ATM,XPC,BUB1B,FANCD2,MRE11,ANAPC1,CDK5RAP2,BLM,DNA2,XRCC2,PCNT,RTEL1,RFWD3,SMC5,PCNA,BRCA2,RBBP8,BRCA1,BANF1,TREX1,RAD51
GO:0007093	Mitotic cell cycle checkpoint signaling	14	127	1.18	2.02	3.11e-10	9606.ENSP00000166345,9606.ENSP00000235310,9606.ENSP00000258149,9606.ENSP00000265433,9606.ENSP00000278616,9606.ENSP00000285021,9606.ENSP00000287598,9606.ENSP00000287647,9606.ENSP00000325863,9606.ENSP00000347232,9606.ENSP00000354361,9606.ENSP00000382628,9606.ENSP00000418960,9606.ENSP00000486676	TRIP13,MAD2L2,MDM2,NBN,ATM,XPC,BUB1B,FANCD2,MRE11,BLM,RFWD3,RBBP8,BRCA1,TREX1
GO:1903047	Mitotic cell cycle process	24	537	0.79	1.47	3.32e-10	9606.ENSP00000166345,9606.ENSP00000235310,9606.ENSP00000258149,9606.ENSP00000265433,9606.ENSP00000278616,9606.ENSP00000285021,9606.ENSP00000287598,9606.ENSP00000287647,9606.ENSP00000325863,9606.ENSP00000339109,9606.ENSP00000343818,9606.ENSP00000347232,9606.ENSP00000351185,9606.ENSP00000352572,9606.ENSP00000353332,9606.ENSP00000354361,9606.ENSP00000354957,9606.ENSP00000368458,9606.ENSP00000369497,…	TRIP13,MAD2L2,MDM2,NBN,ATM,XPC,BUB1B,FANCD2,MRE11,ANAPC1,CDK5RAP2,BLM,DNA2,PCNT,RTEL1,RFWD3,SMC5,PCNA,BRCA2,RBBP8,BRCA1,BANF1,TREX1,RAD51
GO:0006513	Protein monoubiquitination	12	78	1.33	2.17	3.62e-10	9606.ENSP00000229769,9606.ENSP00000256996,9606.ENSP00000289081,9606.ENSP00000330875,9606.ENSP00000367910,9606.ENSP00000369497,9606.ENSP00000373952,9606.ENSP00000385021,9606.ENSP00000418960,9606.ENSP00000493712,9606.ENSP00000494957,9606.ENSP00000498215	FANCE,DDB2,FANCC,FANCF,FANCG,BRCA2,FANCA,FANCL,BRCA1,RAD51,UBE2T,FANCB
GO:0080134	Regulation of response to stress	37	1373	0.57	1.12	4.6e-10	9606.ENSP00000013807,9606.ENSP00000235310,9606.ENSP00000258149,9606.ENSP00000265038,9606.ENSP00000275493,9606.ENSP00000278616,9606.ENSP00000287647,9606.ENSP00000310520,9606.ENSP00000323099,9606.ENSP00000324203,9606.ENSP00000330382,9606.ENSP00000337623,9606.ENSP00000339191,9606.ENSP00000343741,9606.ENSP00000345008,9606.ENSP00000348089,9606.ENSP00000350249,9606.ENSP00000353332,9606.ENSP00000354361,…	ERCC1,MAD2L2,MDM2,ERCC8,EGFR,ATM,FANCD2,ERCC4,ATRIP,WRAP53,PDGFB,RNASEH2B,CAV1,ATR,FBLN5,ERCC6,POT1,RTEL1,RFWD3,DDR2,LMNA,ADAR,SLF2,POLH,ZMPSTE24,PCNA,BRCA2,FANCA,RBBP8,PYCR1,BRCA1,PIK3R1,BANF1,TREX1,SAMHD1,RAD51,FANCB
GO:0016233	Telomere capping	8	17	1.81	2.39	1.02e-09	9606.ENSP00000224950,9606.ENSP00000265433,9606.ENSP00000267415,9606.ENSP00000325863,9606.ENSP00000350249,9606.ENSP00000483117,9606.ENSP00000498042,9606.ENSP00000498499	STN1,NBN,TINF2,MRE11,POT1,ACD,DCLRE1B,CTC1
GO:0050896	Response to stimulus	97	7835	0.23	0.66	1.3e-09	9606.ENSP00000013807,9606.ENSP00000166345,9606.ENSP00000221486,9606.ENSP00000229769,9606.ENSP00000235310,9606.ENSP00000256996,9606.ENSP00000258149,9606.ENSP00000259008,9606.ENSP00000261584,9606.ENSP00000262027,9606.ENSP00000265038,9606.ENSP00000265433,9606.ENSP00000267430,9606.ENSP00000273398,9606.ENSP00000275493,9606.ENSP00000278616,9606.ENSP00000285021,9606.ENSP00000285398,9606.ENSP00000287437,…	ERCC1,TRIP13,RNASEH2A,FANCE,MAD2L2,DDB2,MDM2,BRIP1,PALB2,MARS1,ERCC8,NBN,FANCM,ATP6V1A,EGFR,ATM,XPC,ERCC3,NSMCE2,BUB1B,FANCD2,FANCC,SLX4,SPRTN,WRN,RNASEH2C,TERT,ERCC4,FANCI,LTBP4,TYMS,CEP57,TOP3A,ATRIP,WRAP53,FBN1,MRE11,TRAIP,PDGFB,FANCF,ATP6V0A2,CEP63,RAD51C,RNASEH2B,CAV1,ATR,DMPK,BLM,ERCC6,DNA2,TOMM7,XRCC2,PCNT,RTEL1,RFWD3,SMC5,DDR2,LMNA,ADAR,SLF2,RNF113A,AGPAT2,POLH,POLR3A,ZMPSTE24,XPA,FANCG,P…
GO:0006282	Regulation of DNA repair	16	213	1.02	1.71	1.59e-09	9606.ENSP00000235310,9606.ENSP00000265038,9606.ENSP00000275493,9606.ENSP00000323099,9606.ENSP00000324203,9606.ENSP00000343741,9606.ENSP00000348089,9606.ENSP00000350249,9606.ENSP00000353332,9606.ENSP00000359292,9606.ENSP00000361310,9606.ENSP00000368458,9606.ENSP00000382628,9606.ENSP00000418960,9606.ENSP00000493712,9606.ENSP00000498215	MAD2L2,ERCC8,EGFR,ATRIP,WRAP53,ATR,ERCC6,POT1,RTEL1,SLF2,POLH,PCNA,RBBP8,BRCA1,RAD51,FANCB
GO:0010639	Negative regulation of organelle organization	19	351	0.88	1.49	3.53e-09	9606.ENSP00000013807,9606.ENSP00000166345,9606.ENSP00000224950,9606.ENSP00000235310,9606.ENSP00000265433,9606.ENSP00000267415,9606.ENSP00000278616,9606.ENSP00000287598,9606.ENSP00000294008,9606.ENSP00000310520,9606.ENSP00000334767,9606.ENSP00000343818,9606.ENSP00000350249,9606.ENSP00000353332,9606.ENSP00000357283,9606.ENSP00000418960,9606.ENSP00000428056,9606.ENSP00000483117,9606.ENSP00000498499	ERCC1,TRIP13,STN1,MAD2L2,NBN,TINF2,ATM,BUB1B,SLX4,ERCC4,CENATAC,CDK5RAP2,POT1,RTEL1,LMNA,BRCA1,PIK3R1,ACD,CTC1
GO:0033043	Regulation of organelle organization	33	1190	0.59	1.08	4.21e-09	9606.ENSP00000013807,9606.ENSP00000166345,9606.ENSP00000224950,9606.ENSP00000235310,9606.ENSP00000238892,9606.ENSP00000265433,9606.ENSP00000267415,9606.ENSP00000270861,9606.ENSP00000278616,9606.ENSP00000287437,9606.ENSP00000287598,9606.ENSP00000294008,9606.ENSP00000310520,9606.ENSP00000325863,9606.ENSP00000330382,9606.ENSP00000334767,9606.ENSP00000339109,9606.ENSP00000343741,9606.ENSP00000343818,…	ERCC1,TRIP13,STN1,MAD2L2,CRIPT,NBN,TINF2,PLK4,ATM,NSMCE2,BUB1B,SLX4,ERCC4,MRE11,PDGFB,CENATAC,ANAPC1,ATR,CDK5RAP2,POT1,ELN,RTEL1,SMC5,LMNA,DKC1,SLF2,CPAP,PARN,BRCA1,PIK3R1,ACD,TREX1,CTC1
GO:0018130	Heterocycle biosynthetic process	30	985	0.63	1.14	4.41e-09	9606.ENSP00000166345,9606.ENSP00000235310,9606.ENSP00000262027,9606.ENSP00000273398,9606.ENSP00000274606,9606.ENSP00000285398,9606.ENSP00000295050,9606.ENSP00000298139,9606.ENSP00000309572,9606.ENSP00000315644,9606.ENSP00000324203,9606.ENSP00000325863,9606.ENSP00000332198,9606.ENSP00000348089,9606.ENSP00000348168,9606.ENSP00000349541,9606.ENSP00000350249,9606.ENSP00000358320,9606.ENSP00000358563,…	TRIP13,MAD2L2,MARS1,ATP6V1A,NHP2,ERCC3,SPRTN,WRN,TERT,TYMS,WRAP53,MRE11,NOP10,ERCC6,GTF2E2,CAVIN1,POT1,POLR3GL,DKC1,ALDH18A1,POLH,POLR3A,PCNA,ERCC2,PYCR1,PIK3R1,POLD1,GTF2H5,ACD,TREX1
GO:0071479	Cellular response to ionizing radiation	11	75	1.31	1.94	4.55e-09	9606.ENSP00000258149,9606.ENSP00000278616,9606.ENSP00000298139,9606.ENSP00000343741,9606.ENSP00000347232,9606.ENSP00000361845,9606.ENSP00000369497,9606.ENSP00000418960,9606.ENSP00000476100,9606.ENSP00000486676,9606.ENSP00000493712	MDM2,ATM,WRN,ATR,BLM,ZMPSTE24,BRCA2,BRCA1,GTF2H5,TREX1,RAD51
GO:0007004	Telomere maintenance via telomerase	8	22	1.7	2.17	4.93e-09	9606.ENSP00000274606,9606.ENSP00000309572,9606.ENSP00000324203,9606.ENSP00000325863,9606.ENSP00000332198,9606.ENSP00000350249,9606.ENSP00000358563,9606.ENSP00000483117	NHP2,TERT,WRAP53,MRE11,NOP10,POT1,DKC1,ACD
GO:0007131	Reciprocal meiotic recombination	10	56	1.39	1.98	6.47e-09	9606.ENSP00000166345,9606.ENSP00000259008,9606.ENSP00000267430,9606.ENSP00000278616,9606.ENSP00000287647,9606.ENSP00000294008,9606.ENSP00000310520,9606.ENSP00000325863,9606.ENSP00000336701,9606.ENSP00000493712	TRIP13,BRIP1,FANCM,ATM,FANCD2,SLX4,ERCC4,MRE11,RAD51C,RAD51
GO:0000722	Telomere maintenance via recombination	7	14	1.84	2.11	1.45e-08	9606.ENSP00000013807,9606.ENSP00000287437,9606.ENSP00000310520,9606.ENSP00000336701,9606.ENSP00000354957,9606.ENSP00000369497,9606.ENSP00000493712	ERCC1,NSMCE2,ERCC4,RAD51C,SMC5,BRCA2,RAD51
GO:0045930	Negative regulation of mitotic cell cycle	15	214	0.99	1.54	1.64e-08	9606.ENSP00000166345,9606.ENSP00000235310,9606.ENSP00000258149,9606.ENSP00000265433,9606.ENSP00000278616,9606.ENSP00000285021,9606.ENSP00000287598,9606.ENSP00000287647,9606.ENSP00000325863,9606.ENSP00000347232,9606.ENSP00000354361,9606.ENSP00000382628,9606.ENSP00000405004,9606.ENSP00000418960,9606.ENSP00000486676	TRIP13,MAD2L2,MDM2,NBN,ATM,XPC,BUB1B,FANCD2,MRE11,BLM,RFWD3,RBBP8,ACVR1,BRCA1,TREX1
GO:0034654	Nucleobase-containing compound biosynthetic process	28	913	0.63	1.1	1.8e-08	9606.ENSP00000166345,9606.ENSP00000235310,9606.ENSP00000262027,9606.ENSP00000273398,9606.ENSP00000274606,9606.ENSP00000285398,9606.ENSP00000295050,9606.ENSP00000298139,9606.ENSP00000309572,9606.ENSP00000315644,9606.ENSP00000324203,9606.ENSP00000325863,9606.ENSP00000332198,9606.ENSP00000348089,9606.ENSP00000348168,9606.ENSP00000349541,9606.ENSP00000350249,9606.ENSP00000358320,9606.ENSP00000358563,…	TRIP13,MAD2L2,MARS1,ATP6V1A,NHP2,ERCC3,SPRTN,WRN,TERT,TYMS,WRAP53,MRE11,NOP10,ERCC6,GTF2E2,CAVIN1,POT1,POLR3GL,DKC1,POLH,POLR3A,PCNA,ERCC2,PIK3R1,POLD1,GTF2H5,ACD,TREX1
GO:0034644	Cellular response to UV	11	90	1.23	1.74	2.48e-08	9606.ENSP00000013807,9606.ENSP00000256996,9606.ENSP00000285021,9606.ENSP00000310520,9606.ENSP00000343741,9606.ENSP00000361310,9606.ENSP00000364270,9606.ENSP00000368458,9606.ENSP00000428056,9606.ENSP00000472445,9606.ENSP00000486676	ERCC1,DDB2,XPC,ERCC4,ATR,POLH,XPA,PCNA,PIK3R1,POLD1,TREX1
GO:0071480	Cellular response to gamma radiation	8	29	1.58	1.94	2.87e-08	9606.ENSP00000258149,9606.ENSP00000278616,9606.ENSP00000298139,9606.ENSP00000343741,9606.ENSP00000361845,9606.ENSP00000476100,9606.ENSP00000486676,9606.ENSP00000493712	MDM2,ATM,WRN,ATR,ZMPSTE24,GTF2H5,TREX1,RAD51
GO:1903046	Meiotic cell cycle process	14	188	1.01	1.53	3.25e-08	9606.ENSP00000013807,9606.ENSP00000166345,9606.ENSP00000259008,9606.ENSP00000267430,9606.ENSP00000278616,9606.ENSP00000287598,9606.ENSP00000287647,9606.ENSP00000294008,9606.ENSP00000310520,9606.ENSP00000325863,9606.ENSP00000336701,9606.ENSP00000369497,9606.ENSP00000373952,9606.ENSP00000493712	ERCC1,TRIP13,BRIP1,FANCM,ATM,BUB1B,FANCD2,SLX4,ERCC4,MRE11,RAD51C,BRCA2,FANCA,RAD51
GO:2000278	Regulation of DNA biosynthetic process	12	124	1.13	1.62	4.13e-08	9606.ENSP00000224950,9606.ENSP00000267415,9606.ENSP00000278616,9606.ENSP00000324203,9606.ENSP00000330382,9606.ENSP00000343741,9606.ENSP00000350249,9606.ENSP00000358563,9606.ENSP00000368458,9606.ENSP00000387911,9606.ENSP00000483117,9606.ENSP00000498499	STN1,TINF2,ATM,WRAP53,PDGFB,ATR,POT1,DKC1,PCNA,PARN,ACD,CTC1
GO:0010165	Response to X-ray	8	31	1.55	1.89	4.38e-08	9606.ENSP00000013807,9606.ENSP00000265038,9606.ENSP00000278616,9606.ENSP00000347232,9606.ENSP00000348089,9606.ENSP00000352271,9606.ENSP00000369497,9606.ENSP00000493712	ERCC1,ERCC8,ATM,BLM,ERCC6,XRCC2,BRCA2,RAD51
GO:0033683	Nucleotide-excision repair, DNA incision	6	8	2.02	2	5.22e-08	9606.ENSP00000013807,9606.ENSP00000285398,9606.ENSP00000310520,9606.ENSP00000364270,9606.ENSP00000375809,9606.ENSP00000498881	ERCC1,ERCC3,ERCC4,XPA,ERCC2,ERCC5
GO:0061982	Meiosis I cell cycle process	12	128	1.11	1.58	5.62e-08	9606.ENSP00000013807,9606.ENSP00000166345,9606.ENSP00000259008,9606.ENSP00000267430,9606.ENSP00000278616,9606.ENSP00000287647,9606.ENSP00000294008,9606.ENSP00000310520,9606.ENSP00000325863,9606.ENSP00000336701,9606.ENSP00000369497,9606.ENSP00000493712	ERCC1,TRIP13,BRIP1,FANCM,ATM,FANCD2,SLX4,ERCC4,MRE11,RAD51C,BRCA2,RAD51
GO:1901362	Organic cyclic compound biosynthetic process	30	1121	0.57	0.99	7.85e-08	9606.ENSP00000166345,9606.ENSP00000235310,9606.ENSP00000262027,9606.ENSP00000273398,9606.ENSP00000274606,9606.ENSP00000285398,9606.ENSP00000295050,9606.ENSP00000298139,9606.ENSP00000309572,9606.ENSP00000315644,9606.ENSP00000324203,9606.ENSP00000325863,9606.ENSP00000332198,9606.ENSP00000348089,9606.ENSP00000348168,9606.ENSP00000349541,9606.ENSP00000350249,9606.ENSP00000358320,9606.ENSP00000358563,…	TRIP13,MAD2L2,MARS1,ATP6V1A,NHP2,ERCC3,SPRTN,WRN,TERT,TYMS,WRAP53,MRE11,NOP10,ERCC6,GTF2E2,CAVIN1,POT1,POLR3GL,DKC1,ALDH18A1,POLH,POLR3A,PCNA,ERCC2,PYCR1,PIK3R1,POLD1,GTF2H5,ACD,TREX1
GO:0007059	Chromosome segregation	16	286	0.89	1.35	7.93e-08	9606.ENSP00000166345,9606.ENSP00000259008,9606.ENSP00000267430,9606.ENSP00000278616,9606.ENSP00000287598,9606.ENSP00000287647,9606.ENSP00000294008,9606.ENSP00000310520,9606.ENSP00000321636,9606.ENSP00000325863,9606.ENSP00000336701,9606.ENSP00000343818,9606.ENSP00000354957,9606.ENSP00000375809,9606.ENSP00000418960,9606.ENSP00000433760	TRIP13,BRIP1,FANCM,ATM,BUB1B,FANCD2,SLX4,ERCC4,TOP3A,MRE11,RAD51C,CDK5RAP2,SMC5,ERCC2,BRCA1,BANF1
GO:1901991	Negative regulation of mitotic cell cycle phase transition	13	167	1.03	1.48	8.33e-08	9606.ENSP00000166345,9606.ENSP00000235310,9606.ENSP00000258149,9606.ENSP00000265433,9606.ENSP00000278616,9606.ENSP00000287598,9606.ENSP00000325863,9606.ENSP00000347232,9606.ENSP00000354361,9606.ENSP00000382628,9606.ENSP00000405004,9606.ENSP00000418960,9606.ENSP00000486676	TRIP13,MAD2L2,MDM2,NBN,ATM,BUB1B,MRE11,BLM,RFWD3,RBBP8,ACVR1,BRCA1,TREX1
GO:0051128	Regulation of cellular component organization	45	2365	0.42	0.81	8.75e-08	9606.ENSP00000013807,9606.ENSP00000166345,9606.ENSP00000224950,9606.ENSP00000235310,9606.ENSP00000238892,9606.ENSP00000265433,9606.ENSP00000267415,9606.ENSP00000270861,9606.ENSP00000275493,9606.ENSP00000278616,9606.ENSP00000286307,9606.ENSP00000287437,9606.ENSP00000287598,9606.ENSP00000294008,9606.ENSP00000301945,9606.ENSP00000309953,9606.ENSP00000310520,9606.ENSP00000311905,9606.ENSP00000325863,…	ERCC1,TRIP13,STN1,MAD2L2,CRIPT,NBN,TINF2,PLK4,EGFR,ATM,LSM11,NSMCE2,BUB1B,SLX4,ANTXR1,EFEMP2,ERCC4,LTBP4,MRE11,PDGFB,CENATAC,ANAPC1,CAV1,ATR,CDK5RAP2,FBLN5,DMPK,POT1,ELN,RTEL1,SMC5,DDR2,LMNA,DKC1,SLF2,EXOSC2,ZMPSTE24,CPAP,NIN,PARN,BRCA1,PIK3R1,ACD,TREX1,CTC1
GO:0000729	DNA double-strand break processing	7	20	1.69	1.86	9.31e-08	9606.ENSP00000259008,9606.ENSP00000265433,9606.ENSP00000294008,9606.ENSP00000325863,9606.ENSP00000347232,9606.ENSP00000351185,9606.ENSP00000382628	BRIP1,NBN,SLX4,MRE11,BLM,DNA2,RBBP8
GO:0032210	Regulation of telomere maintenance via telomerase	9	55	1.36	1.7	1.04e-07	9606.ENSP00000224950,9606.ENSP00000267415,9606.ENSP00000278616,9606.ENSP00000343741,9606.ENSP00000350249,9606.ENSP00000358563,9606.ENSP00000387911,9606.ENSP00000483117,9606.ENSP00000498499	STN1,TINF2,ATM,ATR,POT1,DKC1,PARN,ACD,CTC1
GO:0140013	Meiotic nuclear division	13	171	1.02	1.46	1.04e-07	9606.ENSP00000166345,9606.ENSP00000259008,9606.ENSP00000267430,9606.ENSP00000278616,9606.ENSP00000287598,9606.ENSP00000287647,9606.ENSP00000294008,9606.ENSP00000310520,9606.ENSP00000325863,9606.ENSP00000336701,9606.ENSP00000369497,9606.ENSP00000373952,9606.ENSP00000493712	TRIP13,BRIP1,FANCM,ATM,BUB1B,FANCD2,SLX4,ERCC4,MRE11,RAD51C,BRCA2,FANCA,RAD51
GO:0044773	Mitotic DNA damage checkpoint signaling	10	81	1.23	1.6	1.37e-07	9606.ENSP00000258149,9606.ENSP00000265433,9606.ENSP00000278616,9606.ENSP00000285021,9606.ENSP00000287647,9606.ENSP00000325863,9606.ENSP00000347232,9606.ENSP00000354361,9606.ENSP00000418960,9606.ENSP00000486676	MDM2,NBN,ATM,XPC,FANCD2,MRE11,BLM,RFWD3,BRCA1,TREX1
GO:0045935	Positive regulation of nucleobase-containing compound metabolic process	41	2056	0.44	0.82	1.64e-07	9606.ENSP00000013807,9606.ENSP00000224950,9606.ENSP00000235310,9606.ENSP00000262027,9606.ENSP00000265038,9606.ENSP00000265433,9606.ENSP00000267415,9606.ENSP00000275493,9606.ENSP00000278616,9606.ENSP00000285021,9606.ENSP00000294008,9606.ENSP00000298139,9606.ENSP00000309572,9606.ENSP00000324203,9606.ENSP00000325863,9606.ENSP00000330382,9606.ENSP00000343741,9606.ENSP00000343818,9606.ENSP00000347232,…	ERCC1,STN1,MAD2L2,MARS1,ERCC8,NBN,TINF2,EGFR,ATM,XPC,SLX4,WRN,TERT,WRAP53,MRE11,PDGFB,ATR,CDK5RAP2,BLM,ERCC6,POT1,DNA2,RTEL1,DKC1,SLF2,EXOSC2,PCNA,BRCA2,CPAP,ERCC2,RBBP8,PARN,ACVR1,CNBP,BRCA1,PIK3R1,ACD,RAD51,FANCB,CTC1,TFAP2A
GO:0090657	Telomeric loop disassembly	6	11	1.88	1.83	1.88e-07	9606.ENSP00000294008,9606.ENSP00000298139,9606.ENSP00000347232,9606.ENSP00000350249,9606.ENSP00000353332,9606.ENSP00000482313	SLX4,WRN,BLM,POT1,RTEL1,RECQL4
GO:0033260	Nuclear DNA replication	7	24	1.61	1.73	2.49e-07	9606.ENSP00000298139,9606.ENSP00000347232,9606.ENSP00000351185,9606.ENSP00000353332,9606.ENSP00000368458,9606.ENSP00000369497,9606.ENSP00000493712	WRN,BLM,DNA2,RTEL1,PCNA,BRCA2,RAD51
GO:0009650	UV protection	6	12	1.84	1.78	2.71e-07	9606.ENSP00000013807,9606.ENSP00000285398,9606.ENSP00000310520,9606.ENSP00000364270,9606.ENSP00000375809,9606.ENSP00000498881	ERCC1,ERCC3,ERCC4,XPA,ERCC2,ERCC5
GO:0090656	T-circle formation	6	12	1.84	1.78	2.71e-07	9606.ENSP00000013807,9606.ENSP00000265433,9606.ENSP00000294008,9606.ENSP00000298139,9606.ENSP00000347232,9606.ENSP00000351185	ERCC1,NBN,SLX4,WRN,BLM,DNA2
GO:0034502	Protein localization to chromosome	10	92	1.18	1.48	3.88e-07	9606.ENSP00000267415,9606.ENSP00000287598,9606.ENSP00000293760,9606.ENSP00000309572,9606.ENSP00000343741,9606.ENSP00000350249,9606.ENSP00000354957,9606.ENSP00000359292,9606.ENSP00000369497,9606.ENSP00000483117	TINF2,BUB1B,LEMD2,TERT,ATR,POT1,SMC5,SLF2,BRCA2,ACD
GO:0007127	Meiosis I	11	126	1.08	1.39	5.17e-07	9606.ENSP00000166345,9606.ENSP00000259008,9606.ENSP00000267430,9606.ENSP00000278616,9606.ENSP00000287647,9606.ENSP00000294008,9606.ENSP00000310520,9606.ENSP00000325863,9606.ENSP00000336701,9606.ENSP00000369497,9606.ENSP00000493712	TRIP13,BRIP1,FANCM,ATM,FANCD2,SLX4,ERCC4,MRE11,RAD51C,BRCA2,RAD51
GO:0048519	Negative regulation of biological process	71	5313	0.27	0.62	6.55e-07	9606.ENSP00000013807,9606.ENSP00000029410,9606.ENSP00000166345,9606.ENSP00000224950,9606.ENSP00000235310,9606.ENSP00000258149,9606.ENSP00000259008,9606.ENSP00000261584,9606.ENSP00000261772,9606.ENSP00000265433,9606.ENSP00000267415,9606.ENSP00000275493,9606.ENSP00000278616,9606.ENSP00000285021,9606.ENSP00000287598,9606.ENSP00000287647,9606.ENSP00000293760,9606.ENSP00000294008,9606.ENSP00000301945,…	ERCC1,B4GALT7,TRIP13,STN1,MAD2L2,MDM2,BRIP1,PALB2,AARS1,NBN,TINF2,EGFR,ATM,XPC,BUB1B,FANCD2,LEMD2,SLX4,ANTXR1,H1-4,TERT,EFEMP2,ERCC4,TYMS,ATRIP,FBN1,MRE11,TRAIP,PDGFB,CENATAC,CEP63,RNASEH2B,CAV1,ATR,CDK5RAP2,BLM,ERCC6,POT1,DNA2,XRCC2,RTEL1,BSCL2,RFWD3,DDR2,LMNA,ADAR,DKC1,RNF113A,EXOSC2,ZMPSTE24,YRDC,PCNA,BRCA2,EFEMP1,RBBP8,PYCR1,LTBP1,PARN,ACVR1,CNBP,BRCA1,PIK3R1,BANF1,ACD,TREX1,SAMHD1,IFIH1,FANC…
GO:0010604	Positive regulation of macromolecule metabolic process	55	3533	0.33	0.68	6.57e-07	9606.ENSP00000013807,9606.ENSP00000224950,9606.ENSP00000235310,9606.ENSP00000258149,9606.ENSP00000262027,9606.ENSP00000265038,9606.ENSP00000265433,9606.ENSP00000267415,9606.ENSP00000267430,9606.ENSP00000275493,9606.ENSP00000278616,9606.ENSP00000285021,9606.ENSP00000294008,9606.ENSP00000295050,9606.ENSP00000298139,9606.ENSP00000301945,9606.ENSP00000309572,9606.ENSP00000310842,9606.ENSP00000324203,…	ERCC1,STN1,MAD2L2,MDM2,MARS1,ERCC8,NBN,TINF2,FANCM,EGFR,ATM,XPC,SLX4,SPRTN,WRN,ANTXR1,TERT,FANCI,WRAP53,FBN1,MRE11,PDGFB,CAV1,ATR,CDK5RAP2,BLM,ERCC6,POT1,DNA2,RTEL1,DDR2,LMNA,ADAR,DKC1,SLF2,AGPAT2,EXOSC2,POLR3A,ZMPSTE24,PCNA,BRCA2,CPAP,ERCC2,RBBP8,PARN,ACVR1,CNBP,BRCA1,PIK3R1,ACD,RAD51,IFIH1,FANCB,CTC1,TFAP2A
GO:0045132	Meiotic chromosome segregation	10	98	1.15	1.42	6.59e-07	9606.ENSP00000166345,9606.ENSP00000259008,9606.ENSP00000267430,9606.ENSP00000278616,9606.ENSP00000287598,9606.ENSP00000287647,9606.ENSP00000294008,9606.ENSP00000310520,9606.ENSP00000325863,9606.ENSP00000336701	TRIP13,BRIP1,FANCM,ATM,BUB1B,FANCD2,SLX4,ERCC4,MRE11,RAD51C
GO:0048523	Negative regulation of cellular process	66	4736	0.29	0.64	6.59e-07	9606.ENSP00000013807,9606.ENSP00000029410,9606.ENSP00000166345,9606.ENSP00000224950,9606.ENSP00000235310,9606.ENSP00000258149,9606.ENSP00000259008,9606.ENSP00000261584,9606.ENSP00000261772,9606.ENSP00000265433,9606.ENSP00000267415,9606.ENSP00000275493,9606.ENSP00000278616,9606.ENSP00000285021,9606.ENSP00000287598,9606.ENSP00000287647,9606.ENSP00000293760,9606.ENSP00000294008,9606.ENSP00000301945,…	ERCC1,B4GALT7,TRIP13,STN1,MAD2L2,MDM2,BRIP1,PALB2,AARS1,NBN,TINF2,EGFR,ATM,XPC,BUB1B,FANCD2,LEMD2,SLX4,ANTXR1,H1-4,TERT,EFEMP2,ERCC4,TYMS,ATRIP,FBN1,MRE11,TRAIP,PDGFB,CENATAC,CEP63,CAV1,ATR,CDK5RAP2,BLM,ERCC6,POT1,DNA2,XRCC2,RTEL1,RFWD3,DDR2,LMNA,ADAR,DKC1,RNF113A,EXOSC2,ZMPSTE24,PCNA,BRCA2,EFEMP1,RBBP8,PYCR1,LTBP1,PARN,ACVR1,CNBP,BRCA1,PIK3R1,ACD,TREX1,SAMHD1,FANCB,CTC1,ERCC5,TFAP2A
GO:0019219	Regulation of nucleobase-containing compound metabolic process	60	4074	0.31	0.66	6.93e-07	9606.ENSP00000013807,9606.ENSP00000166345,9606.ENSP00000224950,9606.ENSP00000235310,9606.ENSP00000258149,9606.ENSP00000259008,9606.ENSP00000262027,9606.ENSP00000265038,9606.ENSP00000265433,9606.ENSP00000267415,9606.ENSP00000275493,9606.ENSP00000278616,9606.ENSP00000285021,9606.ENSP00000287437,9606.ENSP00000287647,9606.ENSP00000294008,9606.ENSP00000298139,9606.ENSP00000307705,9606.ENSP00000309572,…	ERCC1,TRIP13,STN1,MAD2L2,MDM2,BRIP1,MARS1,ERCC8,NBN,TINF2,EGFR,ATM,XPC,NSMCE2,FANCD2,SLX4,WRN,H1-4,TERT,ERCC4,ATRIP,WRAP53,MRE11,TRAIP,PDGFB,CAV1,ATR,CDK5RAP2,BLM,ERCC6,POT1,DNA2,RTEL1,SMC5,DDR2,LMNA,DKC1,SLF2,POLH,EXOSC2,ZMPSTE24,PCNA,BRCA2,CPAP,FANCA,ERCC2,EFEMP1,RBBP8,PARN,ACVR1,CNBP,BRCA1,PIK3R1,GTF2H5,ACD,TREX1,RAD51,FANCB,CTC1,TFAP2A
GO:0000018	Regulation of DNA recombination	11	132	1.06	1.35	7.77e-07	9606.ENSP00000235310,9606.ENSP00000307705,9606.ENSP00000324203,9606.ENSP00000325863,9606.ENSP00000347232,9606.ENSP00000348089,9606.ENSP00000353332,9606.ENSP00000375809,9606.ENSP00000382628,9606.ENSP00000493712,9606.ENSP00000498215	MAD2L2,H1-4,WRAP53,MRE11,BLM,ERCC6,RTEL1,ERCC2,RBBP8,RAD51,FANCB
GO:2001022	Positive regulation of response to DNA damage stimulus	12	168	1	1.3	7.87e-07	9606.ENSP00000235310,9606.ENSP00000265038,9606.ENSP00000275493,9606.ENSP00000278616,9606.ENSP00000324203,9606.ENSP00000343741,9606.ENSP00000348089,9606.ENSP00000359292,9606.ENSP00000368458,9606.ENSP00000382628,9606.ENSP00000418960,9606.ENSP00000498215	MAD2L2,ERCC8,EGFR,ATM,WRAP53,ATR,ERCC6,SLF2,PCNA,RBBP8,BRCA1,FANCB
GO:0006298	Mismatch repair	7	30	1.51	1.57	8.28e-07	9606.ENSP00000013807,9606.ENSP00000221486,9606.ENSP00000285021,9606.ENSP00000308193,9606.ENSP00000337623,9606.ENSP00000368458,9606.ENSP00000486676	ERCC1,RNASEH2A,XPC,RNASEH2C,RNASEH2B,PCNA,TREX1
GO:1904357	Negative regulation of telomere maintenance via telomere lengthening	7	30	1.51	1.57	8.28e-07	9606.ENSP00000224950,9606.ENSP00000267415,9606.ENSP00000294008,9606.ENSP00000310520,9606.ENSP00000350249,9606.ENSP00000483117,9606.ENSP00000498499	STN1,TINF2,SLX4,ERCC4,POT1,ACD,CTC1
GO:2000573	Positive regulation of DNA biosynthetic process	9	73	1.23	1.45	8.28e-07	9606.ENSP00000278616,9606.ENSP00000324203,9606.ENSP00000330382,9606.ENSP00000343741,9606.ENSP00000350249,9606.ENSP00000358563,9606.ENSP00000368458,9606.ENSP00000387911,9606.ENSP00000483117	ATM,WRAP53,PDGFB,ATR,POT1,DKC1,PCNA,PARN,ACD
GO:0010638	Positive regulation of organelle organization	19	508	0.72	1.05	8.39e-07	9606.ENSP00000013807,9606.ENSP00000265433,9606.ENSP00000267415,9606.ENSP00000270861,9606.ENSP00000278616,9606.ENSP00000287437,9606.ENSP00000294008,9606.ENSP00000325863,9606.ENSP00000330382,9606.ENSP00000343741,9606.ENSP00000343818,9606.ENSP00000350249,9606.ENSP00000353332,9606.ENSP00000354957,9606.ENSP00000358563,9606.ENSP00000359292,9606.ENSP00000371308,9606.ENSP00000387911,9606.ENSP00000483117	ERCC1,NBN,TINF2,PLK4,ATM,NSMCE2,SLX4,MRE11,PDGFB,ATR,CDK5RAP2,POT1,RTEL1,SMC5,DKC1,SLF2,CPAP,PARN,ACD
GO:0090399	Replicative senescence	6	16	1.72	1.62	9.25e-07	9606.ENSP00000013807,9606.ENSP00000278616,9606.ENSP00000298139,9606.ENSP00000309572,9606.ENSP00000343741,9606.ENSP00000498499	ERCC1,ATM,WRN,TERT,ATR,CTC1
GO:2000779	Regulation of double-strand break repair	11	135	1.05	1.33	9.25e-07	9606.ENSP00000235310,9606.ENSP00000323099,9606.ENSP00000324203,9606.ENSP00000343741,9606.ENSP00000348089,9606.ENSP00000350249,9606.ENSP00000353332,9606.ENSP00000359292,9606.ENSP00000382628,9606.ENSP00000493712,9606.ENSP00000498215	MAD2L2,ATRIP,WRAP53,ATR,ERCC6,POT1,RTEL1,SLF2,RBBP8,RAD51,FANCB
GO:0070198	Protein localization to chromosome, telomeric region	6	17	1.69	1.58	1.23e-06	9606.ENSP00000267415,9606.ENSP00000309572,9606.ENSP00000343741,9606.ENSP00000350249,9606.ENSP00000369497,9606.ENSP00000483117	TINF2,TERT,ATR,POT1,BRCA2,ACD
GO:0032201	Telomere maintenance via semi-conservative replication	5	7	2	1.61	1.47e-06	9606.ENSP00000298139,9606.ENSP00000347232,9606.ENSP00000351185,9606.ENSP00000353332,9606.ENSP00000368458	WRN,BLM,DNA2,RTEL1,PCNA
GO:0110025	DNA strand resection involved in replication fork processing	5	7	2	1.61	1.47e-06	9606.ENSP00000265433,9606.ENSP00000325863,9606.ENSP00000382628,9606.ENSP00000418960,9606.ENSP00000493536	NBN,MRE11,RBBP8,BRCA1,SAMHD1
GO:0009059	Macromolecule biosynthetic process	31	1394	0.49	0.8	2.09e-06	9606.ENSP00000029410,9606.ENSP00000166345,9606.ENSP00000235310,9606.ENSP00000261772,9606.ENSP00000262027,9606.ENSP00000274606,9606.ENSP00000285398,9606.ENSP00000295050,9606.ENSP00000298139,9606.ENSP00000309572,9606.ENSP00000315644,9606.ENSP00000324203,9606.ENSP00000325863,9606.ENSP00000332198,9606.ENSP00000348089,9606.ENSP00000348168,9606.ENSP00000349541,9606.ENSP00000350249,9606.ENSP00000358320,…	B4GALT7,TRIP13,MAD2L2,AARS1,MARS1,NHP2,ERCC3,SPRTN,WRN,TERT,TYMS,WRAP53,MRE11,NOP10,ERCC6,GTF2E2,CAVIN1,POT1,POLR3GL,DKC1,POLH,POLR3A,PCNA,B3GALT6,ERCC2,TARS1,PIK3R1,POLD1,GTF2H5,ACD,TREX1
GO:0006290	Pyrimidine dimer repair	5	8	1.94	1.55	2.33e-06	9606.ENSP00000013807,9606.ENSP00000256996,9606.ENSP00000285021,9606.ENSP00000348089,9606.ENSP00000361310	ERCC1,DDB2,XPC,ERCC6,POLH
GO:0022616	DNA strand elongation	6	20	1.62	1.48	2.66e-06	9606.ENSP00000265433,9606.ENSP00000309572,9606.ENSP00000325863,9606.ENSP00000351185,9606.ENSP00000368458,9606.ENSP00000498042	NBN,TERT,MRE11,DNA2,PCNA,DCLRE1B
GO:0051173	Positive regulation of nitrogen compound metabolic process	50	3166	0.34	0.66	2.67e-06	9606.ENSP00000013807,9606.ENSP00000224950,9606.ENSP00000235310,9606.ENSP00000258149,9606.ENSP00000262027,9606.ENSP00000265038,9606.ENSP00000265433,9606.ENSP00000267415,9606.ENSP00000267430,9606.ENSP00000275493,9606.ENSP00000278616,9606.ENSP00000285021,9606.ENSP00000294008,9606.ENSP00000295050,9606.ENSP00000298139,9606.ENSP00000301945,9606.ENSP00000309572,9606.ENSP00000310842,9606.ENSP00000324203,…	ERCC1,STN1,MAD2L2,MDM2,MARS1,ERCC8,NBN,TINF2,FANCM,EGFR,ATM,XPC,SLX4,SPRTN,WRN,ANTXR1,TERT,FANCI,WRAP53,FBN1,MRE11,PDGFB,CAV1,ATR,CDK5RAP2,BLM,ERCC6,POT1,DNA2,RTEL1,DDR2,LMNA,DKC1,SLF2,EXOSC2,PCNA,BRCA2,CPAP,ERCC2,RBBP8,PARN,ACVR1,CNBP,BRCA1,PIK3R1,ACD,RAD51,FANCB,CTC1,TFAP2A
GO:1904358	Positive regulation of telomere maintenance via telomere lengthening	7	37	1.42	1.42	2.7e-06	9606.ENSP00000278616,9606.ENSP00000343741,9606.ENSP00000350249,9606.ENSP00000353332,9606.ENSP00000358563,9606.ENSP00000387911,9606.ENSP00000483117	ATM,ATR,POT1,RTEL1,DKC1,PARN,ACD
GO:0032446	Protein modification by small protein conjugation	22	750	0.61	0.9	3.27e-06	9606.ENSP00000229769,9606.ENSP00000256996,9606.ENSP00000258149,9606.ENSP00000265038,9606.ENSP00000287437,9606.ENSP00000289081,9606.ENSP00000328203,9606.ENSP00000330875,9606.ENSP00000339109,9606.ENSP00000354361,9606.ENSP00000354957,9606.ENSP00000359292,9606.ENSP00000360497,9606.ENSP00000367910,9606.ENSP00000369497,9606.ENSP00000373952,9606.ENSP00000385021,9606.ENSP00000418960,9606.ENSP00000493712,…	FANCE,DDB2,MDM2,ERCC8,NSMCE2,FANCC,TRAIP,FANCF,ANAPC1,RFWD3,SMC5,SLF2,RNF113A,FANCG,BRCA2,FANCA,FANCL,BRCA1,RAD51,UBE2T,IFIH1,FANCB
GO:0007098	Centrosome cycle	9	88	1.15	1.29	3.34e-06	9606.ENSP00000270861,9606.ENSP00000336524,9606.ENSP00000343818,9606.ENSP00000352271,9606.ENSP00000369497,9606.ENSP00000370337,9606.ENSP00000371308,9606.ENSP00000371472,9606.ENSP00000418960	PLK4,CEP63,CDK5RAP2,XRCC2,BRCA2,CEP152,CPAP,NIN,BRCA1
GO:0061820	Telomeric D-loop disassembly	5	9	1.89	1.5	3.45e-06	9606.ENSP00000294008,9606.ENSP00000298139,9606.ENSP00000347232,9606.ENSP00000350249,9606.ENSP00000482313	SLX4,WRN,BLM,POT1,RECQL4
GO:0019222	Regulation of metabolic process	81	6784	0.22	0.55	3.58e-06	9606.ENSP00000013807,9606.ENSP00000166345,9606.ENSP00000224950,9606.ENSP00000235310,9606.ENSP00000253413,9606.ENSP00000258149,9606.ENSP00000259008,9606.ENSP00000261772,9606.ENSP00000262027,9606.ENSP00000265038,9606.ENSP00000265433,9606.ENSP00000267415,9606.ENSP00000267430,9606.ENSP00000273398,9606.ENSP00000275493,9606.ENSP00000278616,9606.ENSP00000285021,9606.ENSP00000287437,9606.ENSP00000287598,…	ERCC1,TRIP13,STN1,MAD2L2,ATP6V1E1,MDM2,BRIP1,AARS1,MARS1,ERCC8,NBN,TINF2,FANCM,ATP6V1A,EGFR,ATM,XPC,NSMCE2,BUB1B,FANCD2,SLX4,SPRTN,WRN,ANTXR1,H1-4,TERT,ERCC4,FANCI,TYMS,ATRIP,WRAP53,FBN1,MRE11,TRAIP,PDGFB,ATP6V0A2,CENATAC,RNASEH2B,CAV1,ATR,CDK5RAP2,FBLN5,BLM,ERCC6,POT1,DNA2,RTEL1,BSCL2,SMC5,DDR2,LMNA,ADAR,DKC1,SLF2,AGPAT2,POLH,EXOSC2,POLR3A,ZMPSTE24,PCNA,BRCA2,CPAP,FANCA,ERCC2,EFEMP1,RBBP8,LTBP1,…
GO:0044085	Cellular component biogenesis	45	2702	0.36	0.67	3.79e-06	9606.ENSP00000013807,9606.ENSP00000166345,9606.ENSP00000258149,9606.ENSP00000259008,9606.ENSP00000265433,9606.ENSP00000267415,9606.ENSP00000270861,9606.ENSP00000274606,9606.ENSP00000275493,9606.ENSP00000289081,9606.ENSP00000294008,9606.ENSP00000298139,9606.ENSP00000307705,9606.ENSP00000309953,9606.ENSP00000311905,9606.ENSP00000315775,9606.ENSP00000317902,9606.ENSP00000324203,9606.ENSP00000332198,…	ERCC1,TRIP13,MDM2,BRIP1,NBN,TINF2,PLK4,NHP2,EGFR,FANCC,SLX4,WRN,H1-4,EFEMP2,LTBP4,COG4,CEP57,WRAP53,NOP10,CEP63,RAD51C,CAV1,CDK5RAP2,FBLN5,BLM,POT1,DNA2,ELN,PCNT,BSCL2,GORAB,LMNA,ADAR,DKC1,EXOSC2,CEP152,CPAP,NIN,FANCA,ERCC2,BANF1,GTF2H5,ACD,SAMHD1,RAD51
GO:0051129	Negative regulation of cellular component organization	21	691	0.62	0.9	3.79e-06	9606.ENSP00000013807,9606.ENSP00000166345,9606.ENSP00000224950,9606.ENSP00000235310,9606.ENSP00000265433,9606.ENSP00000267415,9606.ENSP00000278616,9606.ENSP00000287598,9606.ENSP00000294008,9606.ENSP00000301945,9606.ENSP00000310520,9606.ENSP00000334767,9606.ENSP00000339191,9606.ENSP00000343818,9606.ENSP00000350249,9606.ENSP00000353332,9606.ENSP00000357283,9606.ENSP00000418960,9606.ENSP00000428056,…	ERCC1,TRIP13,STN1,MAD2L2,NBN,TINF2,ATM,BUB1B,SLX4,ANTXR1,ERCC4,CENATAC,CAV1,CDK5RAP2,POT1,RTEL1,LMNA,BRCA1,PIK3R1,ACD,CTC1
GO:0009893	Positive regulation of metabolic process	56	3847	0.31	0.62	4.12e-06	9606.ENSP00000013807,9606.ENSP00000224950,9606.ENSP00000235310,9606.ENSP00000258149,9606.ENSP00000262027,9606.ENSP00000265038,9606.ENSP00000265433,9606.ENSP00000267415,9606.ENSP00000267430,9606.ENSP00000275493,9606.ENSP00000278616,9606.ENSP00000285021,9606.ENSP00000294008,9606.ENSP00000295050,9606.ENSP00000298139,9606.ENSP00000301945,9606.ENSP00000309572,9606.ENSP00000310842,9606.ENSP00000324203,…	ERCC1,STN1,MAD2L2,MDM2,MARS1,ERCC8,NBN,TINF2,FANCM,EGFR,ATM,XPC,SLX4,SPRTN,WRN,ANTXR1,TERT,FANCI,WRAP53,FBN1,MRE11,PDGFB,CAV1,ATR,CDK5RAP2,BLM,ERCC6,POT1,DNA2,RTEL1,BSCL2,DDR2,LMNA,ADAR,DKC1,SLF2,AGPAT2,EXOSC2,POLR3A,ZMPSTE24,PCNA,BRCA2,CPAP,ERCC2,RBBP8,PARN,ACVR1,CNBP,BRCA1,PIK3R1,ACD,RAD51,IFIH1,FANCB,CTC1,TFAP2A
GO:0000731	DNA synthesis involved in DNA repair	7	41	1.37	1.35	4.8e-06	9606.ENSP00000235310,9606.ENSP00000295050,9606.ENSP00000298139,9606.ENSP00000361310,9606.ENSP00000368458,9606.ENSP00000472445,9606.ENSP00000486676	MAD2L2,SPRTN,WRN,POLH,PCNA,POLD1,TREX1
GO:0006283	Transcription-coupled nucleotide-excision repair	5	10	1.84	1.45	4.95e-06	9606.ENSP00000265038,9606.ENSP00000285398,9606.ENSP00000348089,9606.ENSP00000375809,9606.ENSP00000498881	ERCC8,ERCC3,ERCC6,ERCC2,ERCC5
GO:0033365	Protein localization to organelle	21	713	0.61	0.87	6.15e-06	9606.ENSP00000238892,9606.ENSP00000249442,9606.ENSP00000258149,9606.ENSP00000267415,9606.ENSP00000287598,9606.ENSP00000293760,9606.ENSP00000298139,9606.ENSP00000309572,9606.ENSP00000324203,9606.ENSP00000343741,9606.ENSP00000350249,9606.ENSP00000351214,9606.ENSP00000354957,9606.ENSP00000357283,9606.ENSP00000357459,9606.ENSP00000359292,9606.ENSP00000364270,9606.ENSP00000369497,9606.ENSP00000428056,…	CRIPT,MTX2,MDM2,TINF2,BUB1B,LEMD2,WRN,TERT,WRAP53,ATR,POT1,TOMM7,SMC5,LMNA,ADAR,SLF2,XPA,BRCA2,PIK3R1,TOR1AIP1,ACD
GO:0045739	Positive regulation of DNA repair	10	129	1.03	1.17	6.15e-06	9606.ENSP00000235310,9606.ENSP00000265038,9606.ENSP00000275493,9606.ENSP00000324203,9606.ENSP00000348089,9606.ENSP00000359292,9606.ENSP00000368458,9606.ENSP00000382628,9606.ENSP00000418960,9606.ENSP00000498215	MAD2L2,ERCC8,EGFR,WRAP53,ERCC6,SLF2,PCNA,RBBP8,BRCA1,FANCB
GO:0006284	Base-excision repair	7	43	1.35	1.32	6.28e-06	9606.ENSP00000298139,9606.ENSP00000348089,9606.ENSP00000351185,9606.ENSP00000364270,9606.ENSP00000368458,9606.ENSP00000472445,9606.ENSP00000498881	WRN,ERCC6,DNA2,XPA,PCNA,POLD1,ERCC5
GO:0006303	Double-strand break repair via nonhomologous end joining	7	43	1.35	1.32	6.28e-06	9606.ENSP00000013807,9606.ENSP00000265038,9606.ENSP00000278616,9606.ENSP00000310520,9606.ENSP00000325863,9606.ENSP00000348089,9606.ENSP00000498042	ERCC1,ERCC8,ATM,ERCC4,MRE11,ERCC6,DCLRE1B
GO:0060255	Regulation of macromolecule metabolic process	76	6249	0.23	0.55	6.88e-06	9606.ENSP00000013807,9606.ENSP00000166345,9606.ENSP00000224950,9606.ENSP00000235310,9606.ENSP00000258149,9606.ENSP00000259008,9606.ENSP00000261772,9606.ENSP00000262027,9606.ENSP00000265038,9606.ENSP00000265433,9606.ENSP00000267415,9606.ENSP00000267430,9606.ENSP00000275493,9606.ENSP00000278616,9606.ENSP00000285021,9606.ENSP00000287437,9606.ENSP00000287598,9606.ENSP00000287647,9606.ENSP00000294008,…	ERCC1,TRIP13,STN1,MAD2L2,MDM2,BRIP1,AARS1,MARS1,ERCC8,NBN,TINF2,FANCM,EGFR,ATM,XPC,NSMCE2,BUB1B,FANCD2,SLX4,SPRTN,WRN,ANTXR1,H1-4,TERT,ERCC4,FANCI,TYMS,ATRIP,WRAP53,FBN1,MRE11,TRAIP,PDGFB,CENATAC,RNASEH2B,CAV1,ATR,CDK5RAP2,BLM,ERCC6,POT1,DNA2,RTEL1,SMC5,DDR2,LMNA,ADAR,DKC1,SLF2,AGPAT2,POLH,EXOSC2,POLR3A,ZMPSTE24,PCNA,BRCA2,CPAP,FANCA,ERCC2,EFEMP1,RBBP8,LTBP1,PARN,ACVR1,CNBP,BRCA1,PIK3R1,BANF1,GTF…
GO:0010389	Regulation of G2/M transition of mitotic cell cycle	9	99	1.1	1.19	7.88e-06	9606.ENSP00000265433,9606.ENSP00000278616,9606.ENSP00000325863,9606.ENSP00000336701,9606.ENSP00000337623,9606.ENSP00000347232,9606.ENSP00000382628,9606.ENSP00000418960,9606.ENSP00000498499	NBN,ATM,MRE11,RAD51C,RNASEH2B,BLM,RBBP8,BRCA1,CTC1
GO:0044271	Cellular nitrogen compound biosynthetic process	31	1494	0.46	0.73	8.62e-06	9606.ENSP00000166345,9606.ENSP00000235310,9606.ENSP00000261772,9606.ENSP00000262027,9606.ENSP00000273398,9606.ENSP00000274606,9606.ENSP00000285398,9606.ENSP00000295050,9606.ENSP00000298139,9606.ENSP00000309572,9606.ENSP00000315644,9606.ENSP00000324203,9606.ENSP00000325863,9606.ENSP00000332198,9606.ENSP00000339191,9606.ENSP00000348089,9606.ENSP00000348168,9606.ENSP00000349541,9606.ENSP00000350249,…	TRIP13,MAD2L2,AARS1,MARS1,ATP6V1A,NHP2,ERCC3,SPRTN,WRN,TERT,TYMS,WRAP53,MRE11,NOP10,CAV1,ERCC6,GTF2E2,CAVIN1,POT1,POLR3GL,DKC1,POLH,POLR3A,PCNA,ERCC2,TARS1,PIK3R1,POLD1,GTF2H5,ACD,TREX1
GO:0006275	Regulation of DNA replication	10	136	1.01	1.13	9.42e-06	9606.ENSP00000224950,9606.ENSP00000265433,9606.ENSP00000275493,9606.ENSP00000343741,9606.ENSP00000347232,9606.ENSP00000351185,9606.ENSP00000361845,9606.ENSP00000368458,9606.ENSP00000369497,9606.ENSP00000498499	STN1,NBN,EGFR,ATR,BLM,DNA2,ZMPSTE24,PCNA,BRCA2,CTC1
GO:0043412	Macromolecule modification	46	2898	0.34	0.63	9.76e-06	9606.ENSP00000029410,9606.ENSP00000229769,9606.ENSP00000256996,9606.ENSP00000258149,9606.ENSP00000261772,9606.ENSP00000265038,9606.ENSP00000270861,9606.ENSP00000274606,9606.ENSP00000275493,9606.ENSP00000278616,9606.ENSP00000287437,9606.ENSP00000289081,9606.ENSP00000307705,9606.ENSP00000328203,9606.ENSP00000330382,9606.ENSP00000330875,9606.ENSP00000332198,9606.ENSP00000339109,9606.ENSP00000339191,…	B4GALT7,FANCE,DDB2,MDM2,AARS1,ERCC8,PLK4,NHP2,EGFR,ATM,NSMCE2,FANCC,H1-4,TRAIP,PDGFB,FANCF,NOP10,ANAPC1,CAV1,ATR,DMPK,RFWD3,SMC5,DDR2,ADAR,DKC1,SLF2,RNF113A,ZMPSTE24,YRDC,FANCG,B3GALT6,BRCA2,FANCA,EFEMP1,FANCL,PARN,ACVR1,BRCA1,PIK3R1,GTF2H5,TREX1,RAD51,UBE2T,IFIH1,FANCB
GO:0070914	UV-damage excision repair	5	13	1.73	1.33	1.3e-05	9606.ENSP00000013807,9606.ENSP00000256996,9606.ENSP00000285021,9606.ENSP00000364270,9606.ENSP00000486676	ERCC1,DDB2,XPC,XPA,TREX1
GO:0000280	Nuclear division	14	323	0.78	0.96	1.33e-05	9606.ENSP00000166345,9606.ENSP00000259008,9606.ENSP00000267430,9606.ENSP00000278616,9606.ENSP00000287598,9606.ENSP00000287647,9606.ENSP00000294008,9606.ENSP00000310520,9606.ENSP00000325863,9606.ENSP00000336701,9606.ENSP00000369497,9606.ENSP00000373952,9606.ENSP00000433760,9606.ENSP00000493712	TRIP13,BRIP1,FANCM,ATM,BUB1B,FANCD2,SLX4,ERCC4,MRE11,RAD51C,BRCA2,FANCA,BANF1,RAD51
GO:0070192	Chromosome organization involved in meiotic cell cycle	8	76	1.16	1.17	1.44e-05	9606.ENSP00000166345,9606.ENSP00000259008,9606.ENSP00000278616,9606.ENSP00000287598,9606.ENSP00000287647,9606.ENSP00000325863,9606.ENSP00000336701,9606.ENSP00000493712	TRIP13,BRIP1,ATM,BUB1B,FANCD2,MRE11,RAD51C,RAD51
GO:0032202	Telomere assembly	4	4	2.14	1.35	1.58e-05	9606.ENSP00000267415,9606.ENSP00000324203,9606.ENSP00000350249,9606.ENSP00000483117	TINF2,WRAP53,POT1,ACD
GO:0044249	Cellular biosynthetic process	40	2362	0.37	0.64	1.68e-05	9606.ENSP00000029410,9606.ENSP00000166345,9606.ENSP00000235310,9606.ENSP00000261772,9606.ENSP00000262027,9606.ENSP00000273398,9606.ENSP00000274606,9606.ENSP00000278616,9606.ENSP00000285398,9606.ENSP00000292823,9606.ENSP00000295050,9606.ENSP00000298139,9606.ENSP00000309572,9606.ENSP00000315644,9606.ENSP00000324203,9606.ENSP00000325863,9606.ENSP00000332198,9606.ENSP00000339191,9606.ENSP00000348089,…	B4GALT7,TRIP13,MAD2L2,AARS1,MARS1,ATP6V1A,NHP2,ATM,ERCC3,PCYT1A,SPRTN,WRN,TERT,TYMS,WRAP53,MRE11,NOP10,CAV1,ERCC6,GTF2E2,CAVIN1,POT1,POLR3GL,DKC1,ALDH18A1,AGPAT2,POLH,POLR3A,PCNA,B3GALT6,ERCC2,PYCR1,TARS1,BRCA1,PIK3R1,PTDSS1,POLD1,GTF2H5,ACD,TREX1
GO:0022607	Cellular component assembly	41	2467	0.36	0.63	1.83e-05	9606.ENSP00000013807,9606.ENSP00000166345,9606.ENSP00000258149,9606.ENSP00000259008,9606.ENSP00000265433,9606.ENSP00000267415,9606.ENSP00000270861,9606.ENSP00000275493,9606.ENSP00000289081,9606.ENSP00000294008,9606.ENSP00000298139,9606.ENSP00000307705,9606.ENSP00000309953,9606.ENSP00000311905,9606.ENSP00000315775,9606.ENSP00000317902,9606.ENSP00000324203,9606.ENSP00000336524,9606.ENSP00000336701,…	ERCC1,TRIP13,MDM2,BRIP1,NBN,TINF2,PLK4,EGFR,FANCC,SLX4,WRN,H1-4,EFEMP2,LTBP4,COG4,CEP57,WRAP53,CEP63,RAD51C,CAV1,CDK5RAP2,FBLN5,BLM,POT1,DNA2,ELN,PCNT,BSCL2,GORAB,LMNA,ADAR,CEP152,CPAP,NIN,FANCA,ERCC2,BANF1,GTF2H5,ACD,SAMHD1,RAD51
GO:0050789	Regulation of biological process	113	11655	0.13	0.46	1.93e-05	9606.ENSP00000013807,9606.ENSP00000029410,9606.ENSP00000166345,9606.ENSP00000224950,9606.ENSP00000235310,9606.ENSP00000238892,9606.ENSP00000253413,9606.ENSP00000258149,9606.ENSP00000259008,9606.ENSP00000261584,9606.ENSP00000261772,9606.ENSP00000262027,9606.ENSP00000265038,9606.ENSP00000265433,9606.ENSP00000267415,9606.ENSP00000267430,9606.ENSP00000270861,9606.ENSP00000273398,9606.ENSP00000274606,…	ERCC1,B4GALT7,TRIP13,STN1,MAD2L2,CRIPT,ATP6V1E1,MDM2,BRIP1,PALB2,AARS1,MARS1,ERCC8,NBN,TINF2,FANCM,PLK4,ATP6V1A,NHP2,EGFR,ATM,XPC,ERCC3,LSM11,NSMCE2,BUB1B,FANCD2,LEMD2,SLX4,SPRTN,WRN,ANTXR1,H1-4,TERT,EFEMP2,ERCC4,FANCI,LTBP4,TYMS,CEP57,ATRIP,WRAP53,FBN1,MRE11,TRAIP,PDGFB,NOP10,ATP6V0A2,CENATAC,CEP63,RAD51C,RNASEH2B,ANAPC1,CAV1,ATR,CDK5RAP2,FBLN5,DMPK,BLM,ERCC6,CAVIN1,POT1,DNA2,TOMM7,ELN,XRCC2,PCN…
GO:0065007	Biological regulation	117	12385	0.12	0.44	3e-05	9606.ENSP00000013807,9606.ENSP00000029410,9606.ENSP00000166345,9606.ENSP00000224950,9606.ENSP00000235310,9606.ENSP00000238892,9606.ENSP00000253413,9606.ENSP00000258149,9606.ENSP00000259008,9606.ENSP00000261584,9606.ENSP00000261772,9606.ENSP00000262027,9606.ENSP00000265038,9606.ENSP00000265433,9606.ENSP00000267415,9606.ENSP00000267430,9606.ENSP00000270861,9606.ENSP00000273398,9606.ENSP00000274606,…	ERCC1,B4GALT7,TRIP13,STN1,MAD2L2,CRIPT,ATP6V1E1,MDM2,BRIP1,PALB2,AARS1,MARS1,ERCC8,NBN,TINF2,FANCM,PLK4,ATP6V1A,NHP2,EGFR,ATM,XPC,ERCC3,LSM11,NSMCE2,BUB1B,FANCD2,FANCC,LEMD2,SLX4,SPRTN,WRN,ANTXR1,H1-4,TERT,EFEMP2,ERCC4,FANCI,LTBP4,TYMS,CEP57,ATRIP,WRAP53,FBN1,MRE11,TRAIP,PDGFB,NOP10,ATP6V0A2,CENATAC,CEP63,RAD51C,RNASEH2B,ANAPC1,CAV1,ATR,CDK5RAP2,FBLN5,DMPK,BLM,ERCC6,CAVIN1,POT1,DNA2,TOMM7,ELN,XRC…
GO:0051171	Regulation of nitrogen compound metabolic process	70	5734	0.23	0.52	3.22e-05	9606.ENSP00000013807,9606.ENSP00000166345,9606.ENSP00000224950,9606.ENSP00000235310,9606.ENSP00000258149,9606.ENSP00000259008,9606.ENSP00000261772,9606.ENSP00000262027,9606.ENSP00000265038,9606.ENSP00000265433,9606.ENSP00000267415,9606.ENSP00000267430,9606.ENSP00000275493,9606.ENSP00000278616,9606.ENSP00000285021,9606.ENSP00000287437,9606.ENSP00000287598,9606.ENSP00000287647,9606.ENSP00000294008,…	ERCC1,TRIP13,STN1,MAD2L2,MDM2,BRIP1,AARS1,MARS1,ERCC8,NBN,TINF2,FANCM,EGFR,ATM,XPC,NSMCE2,BUB1B,FANCD2,SLX4,SPRTN,WRN,ANTXR1,H1-4,TERT,ERCC4,FANCI,TYMS,ATRIP,WRAP53,FBN1,MRE11,TRAIP,PDGFB,CENATAC,CAV1,ATR,CDK5RAP2,BLM,ERCC6,POT1,DNA2,RTEL1,SMC5,DDR2,LMNA,ADAR,DKC1,SLF2,POLH,EXOSC2,ZMPSTE24,PCNA,BRCA2,CPAP,FANCA,ERCC2,EFEMP1,RBBP8,PARN,ACVR1,CNBP,BRCA1,PIK3R1,GTF2H5,ACD,TREX1,RAD51,FANCB,CTC1,TFAP…
GO:0032212	Positive regulation of telomere maintenance via telomerase	6	34	1.39	1.16	3.33e-05	9606.ENSP00000278616,9606.ENSP00000343741,9606.ENSP00000350249,9606.ENSP00000358563,9606.ENSP00000387911,9606.ENSP00000483117	ATM,ATR,POT1,DKC1,PARN,ACD
GO:0045931	Positive regulation of mitotic cell cycle	9	121	1.01	1.03	3.52e-05	9606.ENSP00000258149,9606.ENSP00000275493,9606.ENSP00000286307,9606.ENSP00000287437,9606.ENSP00000309572,9606.ENSP00000336701,9606.ENSP00000356899,9606.ENSP00000369497,9606.ENSP00000371308	MDM2,EGFR,LSM11,NSMCE2,TERT,RAD51C,DDR2,BRCA2,CPAP
GO:0090068	Positive regulation of cell cycle process	12	251	0.82	0.92	3.75e-05	9606.ENSP00000258149,9606.ENSP00000270861,9606.ENSP00000275493,9606.ENSP00000286307,9606.ENSP00000287437,9606.ENSP00000309572,9606.ENSP00000330382,9606.ENSP00000336701,9606.ENSP00000354957,9606.ENSP00000356899,9606.ENSP00000359292,9606.ENSP00000371308	MDM2,PLK4,EGFR,LSM11,NSMCE2,TERT,PDGFB,RAD51C,SMC5,DDR2,SLF2,CPAP
GO:0006301	Postreplication repair	6	35	1.38	1.14	3.8e-05	9606.ENSP00000235310,9606.ENSP00000295050,9606.ENSP00000361310,9606.ENSP00000368458,9606.ENSP00000418960,9606.ENSP00000472445	MAD2L2,SPRTN,POLH,PCNA,BRCA1,POLD1
GO:0035264	Multicellular organism growth	8	88	1.1	1.06	3.8e-05	9606.ENSP00000013807,9606.ENSP00000261584,9606.ENSP00000278616,9606.ENSP00000348089,9606.ENSP00000352271,9606.ENSP00000361845,9606.ENSP00000375809,9606.ENSP00000498499	ERCC1,PALB2,ATM,ERCC6,XRCC2,ZMPSTE24,ERCC2,CTC1
GO:0051298	Centrosome duplication	6	35	1.38	1.14	3.8e-05	9606.ENSP00000270861,9606.ENSP00000336524,9606.ENSP00000343818,9606.ENSP00000369497,9606.ENSP00000370337,9606.ENSP00000371308	PLK4,CEP63,CDK5RAP2,BRCA2,CEP152,CPAP
GO:0048145	Regulation of fibroblast proliferation	8	89	1.1	1.05	4.04e-05	9606.ENSP00000029410,9606.ENSP00000275493,9606.ENSP00000330382,9606.ENSP00000337623,9606.ENSP00000339191,9606.ENSP00000356899,9606.ENSP00000361845,9606.ENSP00000498499	B4GALT7,EGFR,PDGFB,RNASEH2B,CAV1,DDR2,ZMPSTE24,CTC1
GO:0080090	Regulation of primary metabolic process	71	5899	0.22	0.51	4.16e-05	9606.ENSP00000013807,9606.ENSP00000166345,9606.ENSP00000224950,9606.ENSP00000235310,9606.ENSP00000258149,9606.ENSP00000259008,9606.ENSP00000261772,9606.ENSP00000262027,9606.ENSP00000265038,9606.ENSP00000265433,9606.ENSP00000267415,9606.ENSP00000267430,9606.ENSP00000275493,9606.ENSP00000278616,9606.ENSP00000285021,9606.ENSP00000287437,9606.ENSP00000287598,9606.ENSP00000287647,9606.ENSP00000294008,…	ERCC1,TRIP13,STN1,MAD2L2,MDM2,BRIP1,AARS1,MARS1,ERCC8,NBN,TINF2,FANCM,EGFR,ATM,XPC,NSMCE2,BUB1B,FANCD2,SLX4,SPRTN,WRN,ANTXR1,H1-4,TERT,ERCC4,FANCI,TYMS,ATRIP,WRAP53,FBN1,MRE11,TRAIP,PDGFB,CENATAC,CAV1,ATR,CDK5RAP2,BLM,ERCC6,POT1,DNA2,RTEL1,BSCL2,SMC5,DDR2,LMNA,ADAR,DKC1,SLF2,POLH,EXOSC2,ZMPSTE24,PCNA,BRCA2,CPAP,FANCA,ERCC2,EFEMP1,RBBP8,PARN,ACVR1,CNBP,BRCA1,PIK3R1,GTF2H5,ACD,TREX1,RAD51,FANCB,CTC…
GO:0070200	Establishment of protein localization to telomere	4	6	1.97	1.22	4.27e-05	9606.ENSP00000309572,9606.ENSP00000350249,9606.ENSP00000369497,9606.ENSP00000483117	TERT,POT1,BRCA2,ACD
GO:2000045	Regulation of G1/S transition of mitotic cell cycle	10	164	0.93	0.97	4.27e-05	9606.ENSP00000258149,9606.ENSP00000275493,9606.ENSP00000278616,9606.ENSP00000286307,9606.ENSP00000309572,9606.ENSP00000354361,9606.ENSP00000356899,9606.ENSP00000371308,9606.ENSP00000405004,9606.ENSP00000486676	MDM2,EGFR,ATM,LSM11,TERT,RFWD3,DDR2,CPAP,ACVR1,TREX1
GO:1901992	Positive regulation of mitotic cell cycle phase transition	8	92	1.08	1.03	5.01e-05	9606.ENSP00000258149,9606.ENSP00000275493,9606.ENSP00000286307,9606.ENSP00000287437,9606.ENSP00000309572,9606.ENSP00000336701,9606.ENSP00000356899,9606.ENSP00000371308	MDM2,EGFR,LSM11,NSMCE2,TERT,RAD51C,DDR2,CPAP
GO:0051130	Positive regulation of cellular component organization	24	1049	0.5	0.7	5.08e-05	9606.ENSP00000013807,9606.ENSP00000265433,9606.ENSP00000267415,9606.ENSP00000270861,9606.ENSP00000278616,9606.ENSP00000287437,9606.ENSP00000294008,9606.ENSP00000309953,9606.ENSP00000325863,9606.ENSP00000330382,9606.ENSP00000339191,9606.ENSP00000343741,9606.ENSP00000343818,9606.ENSP00000350249,9606.ENSP00000353332,9606.ENSP00000354957,9606.ENSP00000356899,9606.ENSP00000358563,9606.ENSP00000359292,…	ERCC1,NBN,TINF2,PLK4,ATM,NSMCE2,SLX4,EFEMP2,MRE11,PDGFB,CAV1,ATR,CDK5RAP2,POT1,RTEL1,SMC5,DDR2,DKC1,SLF2,CPAP,NIN,PARN,PIK3R1,ACD
GO:0016070	RNA metabolic process	30	1550	0.43	0.65	5.38e-05	9606.ENSP00000166345,9606.ENSP00000219281,9606.ENSP00000221486,9606.ENSP00000261772,9606.ENSP00000262027,9606.ENSP00000274606,9606.ENSP00000278616,9606.ENSP00000285398,9606.ENSP00000286307,9606.ENSP00000308193,9606.ENSP00000309572,9606.ENSP00000332198,9606.ENSP00000337623,9606.ENSP00000348089,9606.ENSP00000348168,9606.ENSP00000349541,9606.ENSP00000351185,9606.ENSP00000357459,9606.ENSP00000358320,…	TRIP13,USB1,RNASEH2A,AARS1,MARS1,NHP2,ATM,ERCC3,LSM11,RNASEH2C,TERT,NOP10,RNASEH2B,ERCC6,GTF2E2,CAVIN1,DNA2,ADAR,POLR3GL,DKC1,RNF113A,EXOSC2,POLR3A,YRDC,ERCC2,TARS1,PARN,PIK3R1,GTF2H5,SAMHD1
GO:0048518	Positive regulation of biological process	73	6207	0.21	0.5	6.04e-05	9606.ENSP00000013807,9606.ENSP00000224950,9606.ENSP00000235310,9606.ENSP00000258149,9606.ENSP00000262027,9606.ENSP00000265038,9606.ENSP00000265433,9606.ENSP00000267415,9606.ENSP00000267430,9606.ENSP00000270861,9606.ENSP00000274606,9606.ENSP00000275493,9606.ENSP00000278616,9606.ENSP00000285021,9606.ENSP00000285398,9606.ENSP00000286307,9606.ENSP00000287437,9606.ENSP00000294008,9606.ENSP00000295050,…	ERCC1,STN1,MAD2L2,MDM2,MARS1,ERCC8,NBN,TINF2,FANCM,PLK4,NHP2,EGFR,ATM,XPC,ERCC3,LSM11,NSMCE2,SLX4,SPRTN,WRN,ANTXR1,TERT,EFEMP2,FANCI,WRAP53,FBN1,MRE11,PDGFB,NOP10,RAD51C,RNASEH2B,CAV1,ATR,CDK5RAP2,BLM,ERCC6,CAVIN1,POT1,DNA2,TOMM7,XRCC2,PCNT,RTEL1,BSCL2,SMC5,GORAB,DDR2,LMNA,ADAR,DKC1,SLF2,AGPAT2,EXOSC2,POLR3A,ZMPSTE24,PCNA,BRCA2,CPAP,NIN,ERCC2,RBBP8,PARN,ACVR1,CNBP,BRCA1,PIK3R1,ACD,TREX1,RAD51,IFI…
GO:0045934	Negative regulation of nucleobase-containing compound metabolic process	30	1562	0.43	0.64	6.2e-05	9606.ENSP00000013807,9606.ENSP00000224950,9606.ENSP00000235310,9606.ENSP00000258149,9606.ENSP00000265433,9606.ENSP00000267415,9606.ENSP00000278616,9606.ENSP00000294008,9606.ENSP00000307705,9606.ENSP00000309572,9606.ENSP00000310520,9606.ENSP00000330382,9606.ENSP00000339191,9606.ENSP00000343741,9606.ENSP00000347232,9606.ENSP00000348089,9606.ENSP00000350249,9606.ENSP00000353332,9606.ENSP00000358563,…	ERCC1,STN1,MAD2L2,MDM2,NBN,TINF2,ATM,SLX4,H1-4,TERT,ERCC4,PDGFB,CAV1,ATR,BLM,ERCC6,POT1,RTEL1,DKC1,ZMPSTE24,PCNA,BRCA2,RBBP8,PARN,CNBP,BRCA1,ACD,FANCB,CTC1,TFAP2A
GO:0031325	Positive regulation of cellular metabolic process	46	3114	0.31	0.56	6.71e-05	9606.ENSP00000013807,9606.ENSP00000224950,9606.ENSP00000235310,9606.ENSP00000258149,9606.ENSP00000262027,9606.ENSP00000265038,9606.ENSP00000265433,9606.ENSP00000267415,9606.ENSP00000275493,9606.ENSP00000278616,9606.ENSP00000285021,9606.ENSP00000294008,9606.ENSP00000298139,9606.ENSP00000309572,9606.ENSP00000324203,9606.ENSP00000325527,9606.ENSP00000325863,9606.ENSP00000330382,9606.ENSP00000339191,…	ERCC1,STN1,MAD2L2,MDM2,MARS1,ERCC8,NBN,TINF2,EGFR,ATM,XPC,SLX4,WRN,TERT,WRAP53,FBN1,MRE11,PDGFB,CAV1,ATR,CDK5RAP2,BLM,ERCC6,POT1,DNA2,RTEL1,DDR2,LMNA,DKC1,SLF2,EXOSC2,PCNA,BRCA2,CPAP,ERCC2,RBBP8,PARN,ACVR1,CNBP,BRCA1,PIK3R1,ACD,RAD51,FANCB,CTC1,TFAP2A
GO:0022414	Reproductive process	29	1504	0.43	0.63	8.99e-05	9606.ENSP00000013807,9606.ENSP00000166345,9606.ENSP00000259008,9606.ENSP00000265433,9606.ENSP00000267430,9606.ENSP00000270861,9606.ENSP00000275493,9606.ENSP00000278616,9606.ENSP00000287598,9606.ENSP00000287647,9606.ENSP00000289081,9606.ENSP00000294008,9606.ENSP00000301945,9606.ENSP00000310520,9606.ENSP00000317902,9606.ENSP00000321636,9606.ENSP00000325863,9606.ENSP00000330382,9606.ENSP00000336701,…	ERCC1,TRIP13,BRIP1,NBN,FANCM,PLK4,EGFR,ATM,BUB1B,FANCD2,FANCC,SLX4,ANTXR1,ERCC4,CEP57,TOP3A,MRE11,PDGFB,RAD51C,XRCC2,FANCG,PCNA,BRCA2,FANCA,RBBP8,FANCL,PARN,ACVR1,RAD51
GO:1901576	Organic substance biosynthetic process	39	2438	0.35	0.57	9.25e-05	9606.ENSP00000029410,9606.ENSP00000166345,9606.ENSP00000235310,9606.ENSP00000261772,9606.ENSP00000262027,9606.ENSP00000273398,9606.ENSP00000274606,9606.ENSP00000278616,9606.ENSP00000285398,9606.ENSP00000292823,9606.ENSP00000295050,9606.ENSP00000298139,9606.ENSP00000309572,9606.ENSP00000315644,9606.ENSP00000324203,9606.ENSP00000325863,9606.ENSP00000332198,9606.ENSP00000348089,9606.ENSP00000348168,…	B4GALT7,TRIP13,MAD2L2,AARS1,MARS1,ATP6V1A,NHP2,ATM,ERCC3,PCYT1A,SPRTN,WRN,TERT,TYMS,WRAP53,MRE11,NOP10,ERCC6,GTF2E2,CAVIN1,POT1,POLR3GL,DKC1,ALDH18A1,AGPAT2,POLH,POLR3A,PCNA,B3GALT6,ERCC2,PYCR1,TARS1,BRCA1,PIK3R1,PTDSS1,POLD1,GTF2H5,ACD,TREX1
GO:1904354	Negative regulation of telomere capping	4	8	1.84	1.11	9.38e-05	9606.ENSP00000013807,9606.ENSP00000265433,9606.ENSP00000278616,9606.ENSP00000310520	ERCC1,NBN,ATM,ERCC4
GO:0006268	DNA unwinding involved in DNA replication	5	22	1.5	1.07	9.76e-05	9606.ENSP00000298139,9606.ENSP00000347232,9606.ENSP00000416739,9606.ENSP00000482313,9606.ENSP00000493712	WRN,BLM,RECQL,RECQL4,RAD51
GO:0032211	Negative regulation of telomere maintenance via telomerase	5	22	1.5	1.07	9.76e-05	9606.ENSP00000224950,9606.ENSP00000267415,9606.ENSP00000350249,9606.ENSP00000483117,9606.ENSP00000498499	STN1,TINF2,POT1,ACD,CTC1
GO:0035556	Intracellular signal transduction	29	1518	0.42	0.62	0.0001	9606.ENSP00000166345,9606.ENSP00000235310,9606.ENSP00000258149,9606.ENSP00000259008,9606.ENSP00000265433,9606.ENSP00000275493,9606.ENSP00000278616,9606.ENSP00000285021,9606.ENSP00000287598,9606.ENSP00000287647,9606.ENSP00000323099,9606.ENSP00000325527,9606.ENSP00000325863,9606.ENSP00000330382,9606.ENSP00000336524,9606.ENSP00000339191,9606.ENSP00000343741,9606.ENSP00000345997,9606.ENSP00000347232,…	TRIP13,MAD2L2,MDM2,BRIP1,NBN,EGFR,ATM,XPC,BUB1B,FANCD2,ATRIP,FBN1,MRE11,PDGFB,CEP63,CAV1,ATR,DMPK,BLM,ERCC6,DNA2,RFWD3,ZMPSTE24,BRCA2,RBBP8,BRCA1,PIK3R1,TREX1,IFIH1
GO:0007099	Centriole replication	5	23	1.48	1.05	0.00011	9606.ENSP00000270861,9606.ENSP00000336524,9606.ENSP00000343818,9606.ENSP00000370337,9606.ENSP00000371308	PLK4,CEP63,CDK5RAP2,CEP152,CPAP
GO:0031323	Regulation of cellular metabolic process	68	5681	0.22	0.49	0.00011	9606.ENSP00000013807,9606.ENSP00000166345,9606.ENSP00000224950,9606.ENSP00000235310,9606.ENSP00000253413,9606.ENSP00000258149,9606.ENSP00000259008,9606.ENSP00000261772,9606.ENSP00000262027,9606.ENSP00000265038,9606.ENSP00000265433,9606.ENSP00000267415,9606.ENSP00000273398,9606.ENSP00000275493,9606.ENSP00000278616,9606.ENSP00000285021,9606.ENSP00000287437,9606.ENSP00000287647,9606.ENSP00000294008,…	ERCC1,TRIP13,STN1,MAD2L2,ATP6V1E1,MDM2,BRIP1,AARS1,MARS1,ERCC8,NBN,TINF2,ATP6V1A,EGFR,ATM,XPC,NSMCE2,FANCD2,SLX4,WRN,H1-4,TERT,ERCC4,TYMS,ATRIP,WRAP53,FBN1,MRE11,TRAIP,PDGFB,ATP6V0A2,CAV1,ATR,CDK5RAP2,FBLN5,BLM,ERCC6,POT1,DNA2,RTEL1,SMC5,DDR2,LMNA,ADAR,DKC1,SLF2,POLH,EXOSC2,ZMPSTE24,PCNA,BRCA2,CPAP,FANCA,ERCC2,EFEMP1,RBBP8,PARN,ACVR1,CNBP,BRCA1,PIK3R1,GTF2H5,ACD,TREX1,RAD51,FANCB,CTC1,TFAP2A
GO:1900087	Positive regulation of G1/S transition of mitotic cell cycle	6	44	1.28	1.01	0.00011	9606.ENSP00000258149,9606.ENSP00000275493,9606.ENSP00000286307,9606.ENSP00000309572,9606.ENSP00000356899,9606.ENSP00000371308	MDM2,EGFR,LSM11,TERT,DDR2,CPAP
GO:0010569	Regulation of double-strand break repair via homologous recombination	7	72	1.13	0.96	0.00012	9606.ENSP00000235310,9606.ENSP00000324203,9606.ENSP00000348089,9606.ENSP00000353332,9606.ENSP00000382628,9606.ENSP00000493712,9606.ENSP00000498215	MAD2L2,WRAP53,ERCC6,RTEL1,RBBP8,RAD51,FANCB
GO:0019985	Translesion synthesis	5	25	1.44	1.01	0.00016	9606.ENSP00000235310,9606.ENSP00000295050,9606.ENSP00000361310,9606.ENSP00000368458,9606.ENSP00000472445	MAD2L2,SPRTN,POLH,PCNA,POLD1
GO:0034660	ncRNA metabolic process	16	535	0.62	0.72	0.00016	9606.ENSP00000219281,9606.ENSP00000261772,9606.ENSP00000262027,9606.ENSP00000274606,9606.ENSP00000309572,9606.ENSP00000332198,9606.ENSP00000349541,9606.ENSP00000357459,9606.ENSP00000358563,9606.ENSP00000360497,9606.ENSP00000361433,9606.ENSP00000362135,9606.ENSP00000375809,9606.ENSP00000387710,9606.ENSP00000387911,9606.ENSP00000476100	USB1,AARS1,MARS1,NHP2,TERT,NOP10,CAVIN1,ADAR,DKC1,RNF113A,EXOSC2,YRDC,ERCC2,TARS1,PARN,GTF2H5
GO:0045787	Positive regulation of cell cycle	13	349	0.71	0.77	0.00016	9606.ENSP00000258149,9606.ENSP00000270861,9606.ENSP00000275493,9606.ENSP00000286307,9606.ENSP00000287437,9606.ENSP00000309572,9606.ENSP00000330382,9606.ENSP00000336701,9606.ENSP00000354957,9606.ENSP00000356899,9606.ENSP00000359292,9606.ENSP00000369497,9606.ENSP00000371308	MDM2,PLK4,EGFR,LSM11,NSMCE2,TERT,PDGFB,RAD51C,SMC5,DDR2,SLF2,BRCA2,CPAP
GO:0051865	Protein autoubiquitination	7	77	1.1	0.92	0.00018	9606.ENSP00000256996,9606.ENSP00000258149,9606.ENSP00000265038,9606.ENSP00000369497,9606.ENSP00000418960,9606.ENSP00000493712,9606.ENSP00000494957	DDB2,MDM2,ERCC8,BRCA2,BRCA1,RAD51,UBE2T
GO:1901976	Regulation of cell cycle checkpoint	6	49	1.23	0.95	0.00019	9606.ENSP00000337623,9606.ENSP00000343818,9606.ENSP00000354361,9606.ENSP00000369497,9606.ENSP00000418960,9606.ENSP00000493712	RNASEH2B,CDK5RAP2,RFWD3,BRCA2,BRCA1,RAD51
GO:1904353	Regulation of telomere capping	5	26	1.43	0.99	0.00019	9606.ENSP00000013807,9606.ENSP00000265433,9606.ENSP00000278616,9606.ENSP00000310520,9606.ENSP00000353332	ERCC1,NBN,ATM,ERCC4,RTEL1
GO:0016567	Protein ubiquitination	18	682	0.56	0.68	0.0002	9606.ENSP00000229769,9606.ENSP00000256996,9606.ENSP00000258149,9606.ENSP00000265038,9606.ENSP00000289081,9606.ENSP00000328203,9606.ENSP00000330875,9606.ENSP00000339109,9606.ENSP00000354361,9606.ENSP00000360497,9606.ENSP00000367910,9606.ENSP00000369497,9606.ENSP00000373952,9606.ENSP00000385021,9606.ENSP00000418960,9606.ENSP00000493712,9606.ENSP00000494957,9606.ENSP00000498215	FANCE,DDB2,MDM2,ERCC8,FANCC,TRAIP,FANCF,ANAPC1,RFWD3,RNF113A,FANCG,BRCA2,FANCA,FANCL,BRCA1,RAD51,UBE2T,FANCB
GO:0044818	Mitotic G2/M transition checkpoint	6	50	1.22	0.94	0.00021	9606.ENSP00000265433,9606.ENSP00000278616,9606.ENSP00000325863,9606.ENSP00000347232,9606.ENSP00000382628,9606.ENSP00000418960	NBN,ATM,MRE11,BLM,RBBP8,BRCA1
GO:2000001	Regulation of DNA damage checkpoint	5	27	1.41	0.97	0.00022	9606.ENSP00000337623,9606.ENSP00000354361,9606.ENSP00000369497,9606.ENSP00000418960,9606.ENSP00000493712	RNASEH2B,RFWD3,BRCA2,BRCA1,RAD51
GO:0002200	Somatic diversification of immune receptors	6	52	1.2	0.91	0.00026	9606.ENSP00000013807,9606.ENSP00000235310,9606.ENSP00000265433,9606.ENSP00000278616,9606.ENSP00000357459,9606.ENSP00000493536	ERCC1,MAD2L2,NBN,ATM,ADAR,SAMHD1
GO:0006979	Response to oxidative stress	13	368	0.69	0.73	0.00026	9606.ENSP00000013807,9606.ENSP00000265038,9606.ENSP00000275493,9606.ENSP00000285398,9606.ENSP00000287647,9606.ENSP00000289081,9606.ENSP00000298139,9606.ENSP00000348089,9606.ENSP00000368458,9606.ENSP00000375809,9606.ENSP00000384949,9606.ENSP00000457733,9606.ENSP00000486676	ERCC1,ERCC8,EGFR,ERCC3,FANCD2,FANCC,WRN,ERCC6,PCNA,ERCC2,PYCR1,SLC25A24,TREX1
GO:0010605	Negative regulation of macromolecule metabolic process	41	2760	0.31	0.52	0.00026	9606.ENSP00000013807,9606.ENSP00000224950,9606.ENSP00000235310,9606.ENSP00000258149,9606.ENSP00000259008,9606.ENSP00000265433,9606.ENSP00000267415,9606.ENSP00000275493,9606.ENSP00000278616,9606.ENSP00000287598,9606.ENSP00000294008,9606.ENSP00000307705,9606.ENSP00000309572,9606.ENSP00000310520,9606.ENSP00000315644,9606.ENSP00000328203,9606.ENSP00000330382,9606.ENSP00000337623,9606.ENSP00000339191,…	ERCC1,STN1,MAD2L2,MDM2,BRIP1,NBN,TINF2,EGFR,ATM,BUB1B,SLX4,H1-4,TERT,ERCC4,TYMS,TRAIP,PDGFB,RNASEH2B,CAV1,ATR,CDK5RAP2,BLM,ERCC6,POT1,RTEL1,LMNA,ADAR,DKC1,EXOSC2,ZMPSTE24,PCNA,BRCA2,RBBP8,PARN,CNBP,BRCA1,BANF1,ACD,FANCB,CTC1,TFAP2A
GO:2001021	Negative regulation of response to DNA damage stimulus	7	83	1.07	0.87	0.00027	9606.ENSP00000013807,9606.ENSP00000235310,9606.ENSP00000258149,9606.ENSP00000310520,9606.ENSP00000348089,9606.ENSP00000353332,9606.ENSP00000498215	ERCC1,MAD2L2,MDM2,ERCC4,ERCC6,RTEL1,FANCB
GO:0009892	Negative regulation of metabolic process	43	2982	0.3	0.51	0.00029	9606.ENSP00000013807,9606.ENSP00000224950,9606.ENSP00000235310,9606.ENSP00000258149,9606.ENSP00000259008,9606.ENSP00000265433,9606.ENSP00000267415,9606.ENSP00000275493,9606.ENSP00000278616,9606.ENSP00000287598,9606.ENSP00000294008,9606.ENSP00000307705,9606.ENSP00000309572,9606.ENSP00000310520,9606.ENSP00000315644,9606.ENSP00000328203,9606.ENSP00000330382,9606.ENSP00000337623,9606.ENSP00000339191,…	ERCC1,STN1,MAD2L2,MDM2,BRIP1,NBN,TINF2,EGFR,ATM,BUB1B,SLX4,H1-4,TERT,ERCC4,TYMS,TRAIP,PDGFB,RNASEH2B,CAV1,ATR,CDK5RAP2,BLM,ERCC6,POT1,RTEL1,BSCL2,DDR2,LMNA,ADAR,DKC1,EXOSC2,ZMPSTE24,PCNA,BRCA2,RBBP8,PARN,CNBP,BRCA1,BANF1,ACD,FANCB,CTC1,TFAP2A
GO:0051983	Regulation of chromosome segregation	8	128	0.94	0.79	0.00043	9606.ENSP00000166345,9606.ENSP00000235310,9606.ENSP00000278616,9606.ENSP00000287437,9606.ENSP00000287598,9606.ENSP00000339109,9606.ENSP00000343818,9606.ENSP00000354957	TRIP13,MAD2L2,ATM,NSMCE2,BUB1B,ANAPC1,CDK5RAP2,SMC5
GO:0031120	snRNA pseudouridine synthesis	3	3	2.14	0.93	0.00049	9606.ENSP00000274606,9606.ENSP00000332198,9606.ENSP00000358563	NHP2,NOP10,DKC1
GO:0043144	sno(s)RNA processing	4	14	1.6	0.9	0.00049	9606.ENSP00000358563,9606.ENSP00000360497,9606.ENSP00000361433,9606.ENSP00000387911	DKC1,RNF113A,EXOSC2,PARN
GO:0043247	Telomere maintenance in response to DNA damage	4	14	1.6	0.9	0.00049	9606.ENSP00000235310,9606.ENSP00000353332,9606.ENSP00000483117,9606.ENSP00000498042	MAD2L2,RTEL1,ACD,DCLRE1B
GO:1902990	Mitotic telomere maintenance via semi-conservative replication	3	3	2.14	0.93	0.00049	9606.ENSP00000351185,9606.ENSP00000353332,9606.ENSP00000368458	DNA2,RTEL1,PCNA
GO:0090398	Cellular senescence	6	60	1.14	0.83	0.00052	9606.ENSP00000278616,9606.ENSP00000287437,9606.ENSP00000298139,9606.ENSP00000354957,9606.ENSP00000357283,9606.ENSP00000369497	ATM,NSMCE2,WRN,SMC5,LMNA,BRCA2
GO:0048583	Regulation of response to stimulus	51	3931	0.26	0.47	0.00053	9606.ENSP00000013807,9606.ENSP00000235310,9606.ENSP00000258149,9606.ENSP00000265038,9606.ENSP00000275493,9606.ENSP00000278616,9606.ENSP00000287647,9606.ENSP00000293760,9606.ENSP00000309572,9606.ENSP00000310520,9606.ENSP00000311905,9606.ENSP00000323099,9606.ENSP00000324203,9606.ENSP00000325527,9606.ENSP00000328203,9606.ENSP00000330382,9606.ENSP00000337623,9606.ENSP00000339191,9606.ENSP00000343741,…	ERCC1,MAD2L2,MDM2,ERCC8,EGFR,ATM,FANCD2,LEMD2,TERT,ERCC4,LTBP4,ATRIP,WRAP53,FBN1,TRAIP,PDGFB,RNASEH2B,CAV1,ATR,CDK5RAP2,FBLN5,DMPK,ERCC6,POT1,RTEL1,RFWD3,GORAB,DDR2,LMNA,ADAR,SLF2,RNF113A,AGPAT2,POLH,ZMPSTE24,PCNA,BRCA2,CPAP,FANCA,RBBP8,PYCR1,LTBP1,ACVR1,BRCA1,PIK3R1,BANF1,TREX1,SAMHD1,RAD51,IFIH1,FANCB
GO:0070727	Cellular macromolecule localization	32	1948	0.36	0.52	0.00055	9606.ENSP00000238892,9606.ENSP00000249442,9606.ENSP00000258149,9606.ENSP00000267415,9606.ENSP00000275493,9606.ENSP00000278616,9606.ENSP00000285398,9606.ENSP00000287598,9606.ENSP00000293760,9606.ENSP00000298139,9606.ENSP00000309572,9606.ENSP00000315775,9606.ENSP00000324203,9606.ENSP00000325527,9606.ENSP00000339191,9606.ENSP00000343741,9606.ENSP00000345008,9606.ENSP00000349541,9606.ENSP00000350249,…	CRIPT,MTX2,MDM2,TINF2,EGFR,ATM,ERCC3,BUB1B,LEMD2,WRN,TERT,COG4,WRAP53,FBN1,CAV1,ATR,FBLN5,CAVIN1,POT1,TOMM7,SMC5,LMNA,ADAR,SLF2,XPA,BRCA2,NIN,LTBP1,PIK3R1,TOR1AIP1,ACD,TREX1
GO:0007095	Mitotic G2 DNA damage checkpoint signaling	5	34	1.31	0.85	0.00056	9606.ENSP00000265433,9606.ENSP00000278616,9606.ENSP00000325863,9606.ENSP00000347232,9606.ENSP00000418960	NBN,ATM,MRE11,BLM,BRCA1
GO:0051973	Positive regulation of telomerase activity	5	34	1.31	0.85	0.00056	9606.ENSP00000324203,9606.ENSP00000350249,9606.ENSP00000358563,9606.ENSP00000387911,9606.ENSP00000483117	WRAP53,POT1,DKC1,PARN,ACD
GO:0010225	Response to UV-C	4	15	1.57	0.88	0.00059	9606.ENSP00000298139,9606.ENSP00000361310,9606.ENSP00000369497,9606.ENSP00000498881	WRN,POLH,BRCA2,ERCC5
GO:0006998	Nuclear envelope organization	6	62	1.13	0.81	0.0006	9606.ENSP00000293760,9606.ENSP00000345997,9606.ENSP00000357283,9606.ENSP00000361845,9606.ENSP00000433760,9606.ENSP00000435365	LEMD2,DMPK,LMNA,ZMPSTE24,BANF1,TOR1AIP1
GO:0010965	Regulation of mitotic sister chromatid separation	7	96	1	0.78	0.00061	9606.ENSP00000166345,9606.ENSP00000235310,9606.ENSP00000278616,9606.ENSP00000287437,9606.ENSP00000287598,9606.ENSP00000339109,9606.ENSP00000343818	TRIP13,MAD2L2,ATM,NSMCE2,BUB1B,ANAPC1,CDK5RAP2
GO:0031324	Negative regulation of cellular metabolic process	35	2265	0.33	0.5	0.00068	9606.ENSP00000013807,9606.ENSP00000224950,9606.ENSP00000235310,9606.ENSP00000258149,9606.ENSP00000265433,9606.ENSP00000267415,9606.ENSP00000278616,9606.ENSP00000294008,9606.ENSP00000307705,9606.ENSP00000309572,9606.ENSP00000310520,9606.ENSP00000315644,9606.ENSP00000330382,9606.ENSP00000339191,9606.ENSP00000343741,9606.ENSP00000343818,9606.ENSP00000347232,9606.ENSP00000348089,9606.ENSP00000350249,…	ERCC1,STN1,MAD2L2,MDM2,NBN,TINF2,ATM,SLX4,H1-4,TERT,ERCC4,TYMS,PDGFB,CAV1,ATR,CDK5RAP2,BLM,ERCC6,POT1,RTEL1,DDR2,ADAR,DKC1,EXOSC2,ZMPSTE24,PCNA,BRCA2,RBBP8,PARN,CNBP,BRCA1,ACD,FANCB,CTC1,TFAP2A
GO:0034470	ncRNA processing	13	409	0.64	0.64	0.00071	9606.ENSP00000219281,9606.ENSP00000261772,9606.ENSP00000274606,9606.ENSP00000309572,9606.ENSP00000332198,9606.ENSP00000357459,9606.ENSP00000358563,9606.ENSP00000360497,9606.ENSP00000361433,9606.ENSP00000362135,9606.ENSP00000375809,9606.ENSP00000387911,9606.ENSP00000476100	USB1,AARS1,NHP2,TERT,NOP10,ADAR,DKC1,RNF113A,EXOSC2,YRDC,ERCC2,PARN,GTF2H5
GO:0051338	Regulation of transferase activity	20	912	0.48	0.57	0.00071	9606.ENSP00000235310,9606.ENSP00000265433,9606.ENSP00000275493,9606.ENSP00000287598,9606.ENSP00000324203,9606.ENSP00000325527,9606.ENSP00000325863,9606.ENSP00000330382,9606.ENSP00000339191,9606.ENSP00000343818,9606.ENSP00000347232,9606.ENSP00000348089,9606.ENSP00000350249,9606.ENSP00000356899,9606.ENSP00000357459,9606.ENSP00000358563,9606.ENSP00000368458,9606.ENSP00000387911,9606.ENSP00000428056,…	MAD2L2,NBN,EGFR,BUB1B,WRAP53,FBN1,MRE11,PDGFB,CAV1,CDK5RAP2,BLM,ERCC6,POT1,DDR2,ADAR,DKC1,PCNA,PARN,PIK3R1,ACD
GO:0048589	Developmental growth	13	412	0.64	0.64	0.00076	9606.ENSP00000013807,9606.ENSP00000261584,9606.ENSP00000265433,9606.ENSP00000278616,9606.ENSP00000315644,9606.ENSP00000348089,9606.ENSP00000352271,9606.ENSP00000356899,9606.ENSP00000361845,9606.ENSP00000369497,9606.ENSP00000371472,9606.ENSP00000375809,9606.ENSP00000498499	ERCC1,PALB2,NBN,ATM,TYMS,ERCC6,XRCC2,DDR2,ZMPSTE24,BRCA2,NIN,ERCC2,CTC1
GO:0006296	Nucleotide-excision repair, DNA incision, 5-to lesion	3	4	2.02	0.87	0.00078	9606.ENSP00000013807,9606.ENSP00000310520,9606.ENSP00000498881	ERCC1,ERCC4,ERCC5
GO:0006362	Transcription elongation from RNA polymerase I promoter	3	4	2.02	0.87	0.00078	9606.ENSP00000348089,9606.ENSP00000375809,9606.ENSP00000476100	ERCC6,ERCC2,GTF2H5
GO:0031860	Telomeric 3 overhang formation	3	4	2.02	0.87	0.00078	9606.ENSP00000265433,9606.ENSP00000325863,9606.ENSP00000498042	NBN,MRE11,DCLRE1B
GO:1904506	Negative regulation of telomere maintenance in response to DNA damage	3	4	2.02	0.87	0.00078	9606.ENSP00000013807,9606.ENSP00000310520,9606.ENSP00000353332	ERCC1,ERCC4,RTEL1
GO:0051172	Negative regulation of nitrogen compound metabolic process	36	2403	0.32	0.48	0.00092	9606.ENSP00000013807,9606.ENSP00000224950,9606.ENSP00000235310,9606.ENSP00000258149,9606.ENSP00000265433,9606.ENSP00000267415,9606.ENSP00000275493,9606.ENSP00000278616,9606.ENSP00000287598,9606.ENSP00000294008,9606.ENSP00000307705,9606.ENSP00000309572,9606.ENSP00000310520,9606.ENSP00000315644,9606.ENSP00000330382,9606.ENSP00000339191,9606.ENSP00000343741,9606.ENSP00000343818,9606.ENSP00000347232,…	ERCC1,STN1,MAD2L2,MDM2,NBN,TINF2,EGFR,ATM,BUB1B,SLX4,H1-4,TERT,ERCC4,TYMS,PDGFB,CAV1,ATR,CDK5RAP2,BLM,ERCC6,POT1,RTEL1,ADAR,DKC1,EXOSC2,ZMPSTE24,PCNA,BRCA2,RBBP8,PARN,CNBP,BRCA1,ACD,FANCB,CTC1,TFAP2A
GO:0033045	Regulation of sister chromatid segregation	7	105	0.97	0.73	0.00099	9606.ENSP00000166345,9606.ENSP00000235310,9606.ENSP00000278616,9606.ENSP00000287437,9606.ENSP00000287598,9606.ENSP00000339109,9606.ENSP00000343818	TRIP13,MAD2L2,ATM,NSMCE2,BUB1B,ANAPC1,CDK5RAP2
GO:0045740	Positive regulation of DNA replication	5	40	1.24	0.78	0.001	9606.ENSP00000224950,9606.ENSP00000275493,9606.ENSP00000351185,9606.ENSP00000368458,9606.ENSP00000498499	STN1,EGFR,DNA2,PCNA,CTC1
GO:0050794	Regulation of cellular process	104	11025	0.12	0.38	0.001	9606.ENSP00000013807,9606.ENSP00000029410,9606.ENSP00000166345,9606.ENSP00000224950,9606.ENSP00000235310,9606.ENSP00000238892,9606.ENSP00000253413,9606.ENSP00000258149,9606.ENSP00000259008,9606.ENSP00000261584,9606.ENSP00000261772,9606.ENSP00000262027,9606.ENSP00000265038,9606.ENSP00000265433,9606.ENSP00000267415,9606.ENSP00000270861,9606.ENSP00000273398,9606.ENSP00000275493,9606.ENSP00000278616,…	ERCC1,B4GALT7,TRIP13,STN1,MAD2L2,CRIPT,ATP6V1E1,MDM2,BRIP1,PALB2,AARS1,MARS1,ERCC8,NBN,TINF2,PLK4,ATP6V1A,EGFR,ATM,XPC,ERCC3,LSM11,NSMCE2,BUB1B,FANCD2,LEMD2,SLX4,WRN,ANTXR1,H1-4,TERT,EFEMP2,ERCC4,LTBP4,TYMS,CEP57,ATRIP,WRAP53,FBN1,MRE11,TRAIP,PDGFB,ATP6V0A2,CENATAC,CEP63,RAD51C,RNASEH2B,ANAPC1,CAV1,ATR,CDK5RAP2,FBLN5,DMPK,BLM,ERCC6,CAVIN1,POT1,DNA2,TOMM7,ELN,XRCC2,PCNT,RTEL1,RFWD3,SMC5,GORAB,DDR2…
GO:1904872	Regulation of telomerase RNA localization to Cajal body	4	18	1.49	0.81	0.001	9606.ENSP00000274606,9606.ENSP00000332198,9606.ENSP00000358563,9606.ENSP00000387911	NHP2,NOP10,DKC1,PARN
GO:0008104	Protein localization	31	1943	0.35	0.48	0.0012	9606.ENSP00000238892,9606.ENSP00000249442,9606.ENSP00000258149,9606.ENSP00000267415,9606.ENSP00000275493,9606.ENSP00000285398,9606.ENSP00000287598,9606.ENSP00000293760,9606.ENSP00000298139,9606.ENSP00000309572,9606.ENSP00000315775,9606.ENSP00000324203,9606.ENSP00000325527,9606.ENSP00000339191,9606.ENSP00000343741,9606.ENSP00000345008,9606.ENSP00000349541,9606.ENSP00000350249,9606.ENSP00000351214,…	CRIPT,MTX2,MDM2,TINF2,EGFR,ERCC3,BUB1B,LEMD2,WRN,TERT,COG4,WRAP53,FBN1,CAV1,ATR,FBLN5,CAVIN1,POT1,TOMM7,SMC5,LMNA,ADAR,SLF2,XPA,BRCA2,NIN,LTBP1,PIK3R1,TOR1AIP1,ACD,TREX1
GO:0034184	Positive regulation of maintenance of mitotic sister chromatid cohesion	3	5	1.92	0.82	0.0012	9606.ENSP00000287437,9606.ENSP00000354957,9606.ENSP00000359292	NSMCE2,SMC5,SLF2
GO:0045911	Positive regulation of DNA recombination	6	72	1.06	0.73	0.0012	9606.ENSP00000235310,9606.ENSP00000324203,9606.ENSP00000348089,9606.ENSP00000375809,9606.ENSP00000382628,9606.ENSP00000498215	MAD2L2,WRAP53,ERCC6,ERCC2,RBBP8,FANCB
GO:0071453	Cellular response to oxygen levels	8	152	0.86	0.68	0.0012	9606.ENSP00000258149,9606.ENSP00000259008,9606.ENSP00000273398,9606.ENSP00000309572,9606.ENSP00000332247,9606.ENSP00000339191,9606.ENSP00000356899,9606.ENSP00000357283	MDM2,BRIP1,ATP6V1A,TERT,ATP6V0A2,CAV1,DDR2,LMNA
GO:0098535	De novo centriole assembly involved in multi-ciliated epithelial cell differentiation	3	5	1.92	0.82	0.0012	9606.ENSP00000270861,9606.ENSP00000336524,9606.ENSP00000370337	PLK4,CEP63,CEP152
GO:0001960	Negative regulation of cytokine-mediated signaling pathway	6	75	1.05	0.71	0.0015	9606.ENSP00000328203,9606.ENSP00000339191,9606.ENSP00000357459,9606.ENSP00000360497,9606.ENSP00000486676,9606.ENSP00000493536	TRAIP,CAV1,ADAR,RNF113A,TREX1,SAMHD1
GO:0036211	Protein modification process	38	2674	0.29	0.45	0.0015	9606.ENSP00000029410,9606.ENSP00000229769,9606.ENSP00000256996,9606.ENSP00000258149,9606.ENSP00000265038,9606.ENSP00000270861,9606.ENSP00000275493,9606.ENSP00000278616,9606.ENSP00000287437,9606.ENSP00000289081,9606.ENSP00000307705,9606.ENSP00000328203,9606.ENSP00000330382,9606.ENSP00000330875,9606.ENSP00000339109,9606.ENSP00000339191,9606.ENSP00000343741,9606.ENSP00000345997,9606.ENSP00000354361,…	B4GALT7,FANCE,DDB2,MDM2,ERCC8,PLK4,EGFR,ATM,NSMCE2,FANCC,H1-4,TRAIP,PDGFB,FANCF,ANAPC1,CAV1,ATR,DMPK,RFWD3,SMC5,DDR2,SLF2,RNF113A,ZMPSTE24,FANCG,B3GALT6,BRCA2,FANCA,EFEMP1,FANCL,ACVR1,BRCA1,PIK3R1,GTF2H5,RAD51,UBE2T,IFIH1,FANCB
GO:0045910	Negative regulation of DNA recombination	5	44	1.2	0.73	0.0015	9606.ENSP00000235310,9606.ENSP00000307705,9606.ENSP00000347232,9606.ENSP00000353332,9606.ENSP00000498215	MAD2L2,H1-4,BLM,RTEL1,FANCB
GO:0007088	Regulation of mitotic nuclear division	7	118	0.92	0.66	0.0019	9606.ENSP00000166345,9606.ENSP00000235310,9606.ENSP00000278616,9606.ENSP00000287437,9606.ENSP00000287598,9606.ENSP00000330382,9606.ENSP00000343818	TRIP13,MAD2L2,ATM,NSMCE2,BUB1B,PDGFB,CDK5RAP2
GO:0060759	Regulation of response to cytokine stimulus	8	163	0.83	0.64	0.0019	9606.ENSP00000328203,9606.ENSP00000339191,9606.ENSP00000357459,9606.ENSP00000360497,9606.ENSP00000360761,9606.ENSP00000486676,9606.ENSP00000493536,9606.ENSP00000497271	TRAIP,CAV1,ADAR,RNF113A,AGPAT2,TREX1,SAMHD1,IFIH1
GO:0010824	Regulation of centrosome duplication	5	47	1.17	0.7	0.002	9606.ENSP00000270861,9606.ENSP00000334767,9606.ENSP00000343818,9606.ENSP00000371308,9606.ENSP00000418960	PLK4,CENATAC,CDK5RAP2,CPAP,BRCA1
GO:0016925	Protein sumoylation	5	48	1.16	0.69	0.0022	9606.ENSP00000258149,9606.ENSP00000287437,9606.ENSP00000354957,9606.ENSP00000359292,9606.ENSP00000497271	MDM2,NSMCE2,SMC5,SLF2,IFIH1
GO:0035518	Histone H2A monoubiquitination	4	23	1.38	0.72	0.0022	9606.ENSP00000256996,9606.ENSP00000369497,9606.ENSP00000418960,9606.ENSP00000493712	DDB2,BRCA2,BRCA1,RAD51
GO:0046599	Regulation of centriole replication	4	23	1.38	0.72	0.0022	9606.ENSP00000270861,9606.ENSP00000343818,9606.ENSP00000371308,9606.ENSP00000418960	PLK4,CDK5RAP2,CPAP,BRCA1
GO:0044806	G-quadruplex DNA unwinding	3	7	1.77	0.73	0.0024	9606.ENSP00000298139,9606.ENSP00000347232,9606.ENSP00000351185	WRN,BLM,DNA2
GO:1904429	Regulation of t-circle formation	3	7	1.77	0.73	0.0024	9606.ENSP00000013807,9606.ENSP00000294008,9606.ENSP00000353332	ERCC1,SLX4,RTEL1
GO:0006360	Transcription by RNA polymerase I	4	25	1.35	0.68	0.0029	9606.ENSP00000348089,9606.ENSP00000349541,9606.ENSP00000375809,9606.ENSP00000476100	ERCC6,CAVIN1,ERCC2,GTF2H5
GO:0007140	Male meiotic nuclear division	5	53	1.12	0.64	0.0032	9606.ENSP00000166345,9606.ENSP00000278616,9606.ENSP00000336701,9606.ENSP00000369497,9606.ENSP00000373952	TRIP13,ATM,RAD51C,BRCA2,FANCA
GO:0033036	Macromolecule localization	34	2356	0.3	0.42	0.0032	9606.ENSP00000238892,9606.ENSP00000249442,9606.ENSP00000258149,9606.ENSP00000267415,9606.ENSP00000275493,9606.ENSP00000278616,9606.ENSP00000285398,9606.ENSP00000287598,9606.ENSP00000293760,9606.ENSP00000298139,9606.ENSP00000309572,9606.ENSP00000315775,9606.ENSP00000324203,9606.ENSP00000325527,9606.ENSP00000339191,9606.ENSP00000343741,9606.ENSP00000345008,9606.ENSP00000349541,9606.ENSP00000350249,…	CRIPT,MTX2,MDM2,TINF2,EGFR,ATM,ERCC3,BUB1B,LEMD2,WRN,TERT,COG4,WRAP53,FBN1,CAV1,ATR,FBLN5,CAVIN1,POT1,TOMM7,BSCL2,SMC5,LMNA,ADAR,DKC1,SLF2,XPA,BRCA2,NIN,LTBP1,PIK3R1,TOR1AIP1,ACD,TREX1
GO:0045003	Double-strand break repair via synthesis-dependent strand annealing	3	8	1.72	0.69	0.0032	9606.ENSP00000267430,9606.ENSP00000336701,9606.ENSP00000493712	FANCM,RAD51C,RAD51
GO:2000781	Positive regulation of double-strand break repair	6	89	0.97	0.62	0.0034	9606.ENSP00000235310,9606.ENSP00000324203,9606.ENSP00000348089,9606.ENSP00000359292,9606.ENSP00000382628,9606.ENSP00000498215	MAD2L2,WRAP53,ERCC6,SLF2,RBBP8,FANCB
GO:0048146	Positive regulation of fibroblast proliferation	5	54	1.11	0.63	0.0035	9606.ENSP00000275493,9606.ENSP00000330382,9606.ENSP00000337623,9606.ENSP00000356899,9606.ENSP00000498499	EGFR,PDGFB,RNASEH2B,DDR2,CTC1
GO:0030071	Regulation of mitotic metaphase/anaphase transition	6	91	0.96	0.6	0.0038	9606.ENSP00000166345,9606.ENSP00000235310,9606.ENSP00000278616,9606.ENSP00000287437,9606.ENSP00000287598,9606.ENSP00000343818	TRIP13,MAD2L2,ATM,NSMCE2,BUB1B,CDK5RAP2
GO:0033047	Regulation of mitotic sister chromatid segregation	5	55	1.1	0.62	0.0038	9606.ENSP00000166345,9606.ENSP00000235310,9606.ENSP00000278616,9606.ENSP00000287598,9606.ENSP00000343818	TRIP13,MAD2L2,ATM,BUB1B,CDK5RAP2
GO:0090329	Regulation of DNA-templated DNA replication	5	57	1.09	0.61	0.0043	9606.ENSP00000265433,9606.ENSP00000347232,9606.ENSP00000361845,9606.ENSP00000368458,9606.ENSP00000369497	NBN,BLM,ZMPSTE24,PCNA,BRCA2
GO:0051304	Chromosome separation	4	29	1.28	0.63	0.0046	9606.ENSP00000267430,9606.ENSP00000294008,9606.ENSP00000310520,9606.ENSP00000321636	FANCM,SLX4,ERCC4,TOP3A
GO:0010467	Gene expression	31	2101	0.31	0.41	0.0048	9606.ENSP00000013807,9606.ENSP00000166345,9606.ENSP00000219281,9606.ENSP00000235310,9606.ENSP00000261772,9606.ENSP00000262027,9606.ENSP00000265433,9606.ENSP00000274606,9606.ENSP00000285398,9606.ENSP00000286307,9606.ENSP00000295050,9606.ENSP00000309572,9606.ENSP00000332198,9606.ENSP00000337623,9606.ENSP00000348089,9606.ENSP00000348168,9606.ENSP00000349541,9606.ENSP00000357459,9606.ENSP00000358320,…	ERCC1,TRIP13,USB1,MAD2L2,AARS1,MARS1,NBN,NHP2,ERCC3,LSM11,SPRTN,TERT,NOP10,RNASEH2B,ERCC6,GTF2E2,CAVIN1,ADAR,POLR3GL,DKC1,RNF113A,EXOSC2,POLR3A,ZMPSTE24,YRDC,ERCC2,TARS1,PARN,PIK3R1,GTF2H5,SAMHD1
GO:0048585	Negative regulation of response to stimulus	26	1612	0.35	0.42	0.0048	9606.ENSP00000013807,9606.ENSP00000235310,9606.ENSP00000258149,9606.ENSP00000275493,9606.ENSP00000278616,9606.ENSP00000293760,9606.ENSP00000309572,9606.ENSP00000310520,9606.ENSP00000325527,9606.ENSP00000328203,9606.ENSP00000330382,9606.ENSP00000339191,9606.ENSP00000348089,9606.ENSP00000353332,9606.ENSP00000356899,9606.ENSP00000357283,9606.ENSP00000357459,9606.ENSP00000360497,9606.ENSP00000384949,…	ERCC1,MAD2L2,MDM2,EGFR,ATM,LEMD2,TERT,ERCC4,FBN1,TRAIP,PDGFB,CAV1,ERCC6,RTEL1,DDR2,LMNA,ADAR,RNF113A,PYCR1,LTBP1,ACVR1,BRCA1,BANF1,TREX1,SAMHD1,FANCB
GO:0031118	rRNA pseudouridine synthesis	3	10	1.62	0.64	0.0051	9606.ENSP00000274606,9606.ENSP00000332198,9606.ENSP00000358563	NHP2,NOP10,DKC1
GO:2001032	Regulation of double-strand break repair via nonhomologous end joining	4	30	1.27	0.61	0.0051	9606.ENSP00000235310,9606.ENSP00000324203,9606.ENSP00000348089,9606.ENSP00000350249	MAD2L2,WRAP53,ERCC6,POT1
GO:0018193	Peptidyl-amino acid modification	18	900	0.44	0.45	0.0052	9606.ENSP00000258149,9606.ENSP00000275493,9606.ENSP00000278616,9606.ENSP00000287437,9606.ENSP00000307705,9606.ENSP00000330382,9606.ENSP00000339191,9606.ENSP00000343741,9606.ENSP00000345997,9606.ENSP00000354957,9606.ENSP00000356899,9606.ENSP00000359292,9606.ENSP00000360497,9606.ENSP00000361845,9606.ENSP00000369497,9606.ENSP00000378058,9606.ENSP00000405004,9606.ENSP00000497271	MDM2,EGFR,ATM,NSMCE2,H1-4,PDGFB,CAV1,ATR,DMPK,SMC5,DDR2,SLF2,RNF113A,ZMPSTE24,BRCA2,EFEMP1,ACVR1,IFIH1
GO:0009888	Tissue development	27	1723	0.34	0.41	0.0055	9606.ENSP00000258149,9606.ENSP00000261584,9606.ENSP00000270861,9606.ENSP00000275493,9606.ENSP00000278616,9606.ENSP00000285398,9606.ENSP00000293760,9606.ENSP00000309953,9606.ENSP00000315644,9606.ENSP00000330382,9606.ENSP00000336524,9606.ENSP00000339191,9606.ENSP00000351807,9606.ENSP00000352271,9606.ENSP00000354689,9606.ENSP00000356737,9606.ENSP00000356899,9606.ENSP00000357283,9606.ENSP00000360761,…	MDM2,PALB2,PLK4,EGFR,ATM,ERCC3,LEMD2,EFEMP2,TYMS,PDGFB,CEP63,CAV1,ELN,XRCC2,SLC39A13,GORAB,DDR2,LMNA,AGPAT2,ZMPSTE24,PCNA,CEP152,ERCC2,ACVR1,TREX1,CTC1,TFAP2A
GO:0034504	Protein localization to nucleus	8	195	0.76	0.53	0.0056	9606.ENSP00000258149,9606.ENSP00000298139,9606.ENSP00000324203,9606.ENSP00000357283,9606.ENSP00000357459,9606.ENSP00000364270,9606.ENSP00000428056,9606.ENSP00000435365	MDM2,WRN,WRAP53,LMNA,ADAR,XPA,PIK3R1,TOR1AIP1
GO:0007094	Mitotic spindle assembly checkpoint signaling	4	31	1.25	0.6	0.0057	9606.ENSP00000166345,9606.ENSP00000235310,9606.ENSP00000278616,9606.ENSP00000287598	TRIP13,MAD2L2,ATM,BUB1B
GO:0016073	snRNA metabolic process	5	62	1.05	0.57	0.006	9606.ENSP00000219281,9606.ENSP00000274606,9606.ENSP00000332198,9606.ENSP00000358563,9606.ENSP00000361433	USB1,NHP2,NOP10,DKC1,EXOSC2
GO:0006997	Nucleus organization	7	147	0.82	0.53	0.0062	9606.ENSP00000293760,9606.ENSP00000324203,9606.ENSP00000345997,9606.ENSP00000357283,9606.ENSP00000361845,9606.ENSP00000433760,9606.ENSP00000435365	LEMD2,WRAP53,DMPK,LMNA,ZMPSTE24,BANF1,TOR1AIP1
GO:0031571	Mitotic G1 DNA damage checkpoint signaling	4	32	1.24	0.59	0.0062	9606.ENSP00000258149,9606.ENSP00000278616,9606.ENSP00000354361,9606.ENSP00000486676	MDM2,ATM,RFWD3,TREX1
GO:0072711	Cellular response to hydroxyurea	3	11	1.58	0.61	0.0062	9606.ENSP00000347232,9606.ENSP00000486676,9606.ENSP00000493712	BLM,TREX1,RAD51
GO:0045143	Homologous chromosome segregation	5	63	1.04	0.57	0.0063	9606.ENSP00000166345,9606.ENSP00000259008,9606.ENSP00000278616,9606.ENSP00000287647,9606.ENSP00000325863	TRIP13,BRIP1,ATM,FANCD2,MRE11
GO:0070482	Response to oxygen levels	10	318	0.64	0.49	0.0064	9606.ENSP00000258149,9606.ENSP00000259008,9606.ENSP00000273398,9606.ENSP00000278616,9606.ENSP00000285398,9606.ENSP00000309572,9606.ENSP00000332247,9606.ENSP00000339191,9606.ENSP00000356899,9606.ENSP00000357283	MDM2,BRIP1,ATP6V1A,ATM,ERCC3,TERT,ATP6V0A2,CAV1,DDR2,LMNA
GO:0048522	Positive regulation of cellular process	61	5584	0.18	0.34	0.0073	9606.ENSP00000013807,9606.ENSP00000224950,9606.ENSP00000235310,9606.ENSP00000258149,9606.ENSP00000262027,9606.ENSP00000265038,9606.ENSP00000265433,9606.ENSP00000267415,9606.ENSP00000270861,9606.ENSP00000275493,9606.ENSP00000278616,9606.ENSP00000285021,9606.ENSP00000285398,9606.ENSP00000286307,9606.ENSP00000287437,9606.ENSP00000294008,9606.ENSP00000298139,9606.ENSP00000309572,9606.ENSP00000309953,…	ERCC1,STN1,MAD2L2,MDM2,MARS1,ERCC8,NBN,TINF2,PLK4,EGFR,ATM,XPC,ERCC3,LSM11,NSMCE2,SLX4,WRN,TERT,EFEMP2,WRAP53,FBN1,MRE11,PDGFB,RAD51C,RNASEH2B,CAV1,ATR,CDK5RAP2,BLM,ERCC6,CAVIN1,POT1,DNA2,TOMM7,XRCC2,PCNT,RTEL1,SMC5,GORAB,DDR2,LMNA,DKC1,SLF2,AGPAT2,EXOSC2,PCNA,BRCA2,CPAP,NIN,ERCC2,RBBP8,PARN,ACVR1,CNBP,BRCA1,PIK3R1,ACD,RAD51,FANCB,CTC1,TFAP2A
GO:0001959	Regulation of cytokine-mediated signaling pathway	7	152	0.81	0.51	0.0074	9606.ENSP00000328203,9606.ENSP00000339191,9606.ENSP00000357459,9606.ENSP00000360497,9606.ENSP00000360761,9606.ENSP00000486676,9606.ENSP00000493536	TRAIP,CAV1,ADAR,RNF113A,AGPAT2,TREX1,SAMHD1
GO:0010826	Negative regulation of centrosome duplication	3	12	1.54	0.59	0.0075	9606.ENSP00000334767,9606.ENSP00000343818,9606.ENSP00000418960	CENATAC,CDK5RAP2,BRCA1
GO:0031126	sno(s)RNA 3-end processing	3	12	1.54	0.59	0.0075	9606.ENSP00000358563,9606.ENSP00000361433,9606.ENSP00000387911	DKC1,EXOSC2,PARN
GO:0048251	Elastic fiber assembly	3	12	1.54	0.59	0.0075	9606.ENSP00000309953,9606.ENSP00000311905,9606.ENSP00000345008	EFEMP2,LTBP4,FBLN5
GO:0001701	In utero embryonic development	11	393	0.59	0.46	0.0077	9606.ENSP00000261584,9606.ENSP00000265433,9606.ENSP00000270861,9606.ENSP00000275493,9606.ENSP00000330382,9606.ENSP00000337623,9606.ENSP00000352271,9606.ENSP00000369497,9606.ENSP00000375809,9606.ENSP00000382628,9606.ENSP00000405004	PALB2,NBN,PLK4,EGFR,PDGFB,RNASEH2B,XRCC2,BRCA2,ERCC2,RBBP8,ACVR1
GO:0000226	Microtubule cytoskeleton organization	13	542	0.52	0.44	0.0086	9606.ENSP00000238892,9606.ENSP00000270861,9606.ENSP00000317902,9606.ENSP00000336524,9606.ENSP00000343818,9606.ENSP00000352271,9606.ENSP00000352572,9606.ENSP00000357283,9606.ENSP00000369497,9606.ENSP00000370337,9606.ENSP00000371308,9606.ENSP00000371472,9606.ENSP00000418960	CRIPT,PLK4,CEP57,CEP63,CDK5RAP2,XRCC2,PCNT,LMNA,BRCA2,CEP152,CPAP,NIN,BRCA1
GO:0036295	Cellular response to increased oxygen levels	3	13	1.51	0.57	0.0089	9606.ENSP00000273398,9606.ENSP00000332247,9606.ENSP00000339191	ATP6V1A,ATP6V0A2,CAV1
GO:1904754	Positive regulation of vascular associated smooth muscle cell migration	3	13	1.51	0.57	0.0089	9606.ENSP00000309572,9606.ENSP00000330382,9606.ENSP00000356899	TERT,PDGFB,DDR2
GO:0062197	Cellular response to chemical stress	9	272	0.66	0.47	0.0092	9606.ENSP00000275493,9606.ENSP00000278616,9606.ENSP00000287647,9606.ENSP00000289081,9606.ENSP00000339191,9606.ENSP00000368458,9606.ENSP00000384949,9606.ENSP00000457733,9606.ENSP00000486676	EGFR,ATM,FANCD2,FANCC,CAV1,PCNA,PYCR1,SLC25A24,TREX1
GO:0009790	Embryo development	19	1049	0.4	0.39	0.0104	9606.ENSP00000013807,9606.ENSP00000261584,9606.ENSP00000265433,9606.ENSP00000270861,9606.ENSP00000275493,9606.ENSP00000278616,9606.ENSP00000285398,9606.ENSP00000325527,9606.ENSP00000330382,9606.ENSP00000337623,9606.ENSP00000352271,9606.ENSP00000369497,9606.ENSP00000375809,9606.ENSP00000378058,9606.ENSP00000382628,9606.ENSP00000405004,9606.ENSP00000418960,9606.ENSP00000483117,9606.ENSP00000501092	ERCC1,PALB2,NBN,PLK4,EGFR,ATM,ERCC3,FBN1,PDGFB,RNASEH2B,XRCC2,BRCA2,ERCC2,EFEMP1,RBBP8,ACVR1,BRCA1,ACD,TFAP2A
GO:0006401	RNA catabolic process	7	164	0.77	0.47	0.0109	9606.ENSP00000221486,9606.ENSP00000278616,9606.ENSP00000308193,9606.ENSP00000337623,9606.ENSP00000351185,9606.ENSP00000361433,9606.ENSP00000387911	RNASEH2A,ATM,RNASEH2C,RNASEH2B,DNA2,EXOSC2,PARN
GO:0043516	Regulation of DNA damage response, signal transduction by p53 class mediator	4	39	1.15	0.51	0.0116	9606.ENSP00000258149,9606.ENSP00000278616,9606.ENSP00000343741,9606.ENSP00000361845	MDM2,ATM,ATR,ZMPSTE24
GO:1905168	Positive regulation of double-strand break repair via homologous recombination	4	39	1.15	0.51	0.0116	9606.ENSP00000324203,9606.ENSP00000348089,9606.ENSP00000382628,9606.ENSP00000498215	WRAP53,ERCC6,RBBP8,FANCB
GO:0022412	Cellular process involved in reproduction in multicellular organism	11	417	0.56	0.42	0.0121	9606.ENSP00000013807,9606.ENSP00000166345,9606.ENSP00000259008,9606.ENSP00000278616,9606.ENSP00000289081,9606.ENSP00000317902,9606.ENSP00000336701,9606.ENSP00000367910,9606.ENSP00000369497,9606.ENSP00000373952,9606.ENSP00000405004	ERCC1,TRIP13,BRIP1,ATM,FANCC,CEP57,RAD51C,FANCG,BRCA2,FANCA,ACVR1
GO:1904874	Positive regulation of telomerase RNA localization to Cajal body	3	15	1.44	0.52	0.0124	9606.ENSP00000274606,9606.ENSP00000332198,9606.ENSP00000358563	NHP2,NOP10,DKC1
GO:0006354	DNA-templated transcription, elongation	4	40	1.14	0.51	0.0125	9606.ENSP00000285398,9606.ENSP00000348089,9606.ENSP00000375809,9606.ENSP00000476100	ERCC3,ERCC6,ERCC2,GTF2H5
GO:0008630	Intrinsic apoptotic signaling pathway in response to DNA damage	5	75	0.97	0.49	0.0125	9606.ENSP00000278616,9606.ENSP00000348089,9606.ENSP00000369497,9606.ENSP00000418960,9606.ENSP00000428056	ATM,ERCC6,BRCA2,BRCA1,PIK3R1
GO:2000134	Negative regulation of G1/S transition of mitotic cell cycle	5	75	0.97	0.49	0.0125	9606.ENSP00000258149,9606.ENSP00000278616,9606.ENSP00000354361,9606.ENSP00000405004,9606.ENSP00000486676	MDM2,ATM,RFWD3,ACVR1,TREX1
GO:0034655	Nucleobase-containing compound catabolic process	9	287	0.64	0.43	0.013	9606.ENSP00000221486,9606.ENSP00000278616,9606.ENSP00000308193,9606.ENSP00000337623,9606.ENSP00000351185,9606.ENSP00000361433,9606.ENSP00000387911,9606.ENSP00000486676,9606.ENSP00000493536	RNASEH2A,ATM,RNASEH2C,RNASEH2B,DNA2,EXOSC2,PARN,TREX1,SAMHD1
GO:0016445	Somatic diversification of immunoglobulins	4	41	1.13	0.5	0.0135	9606.ENSP00000013807,9606.ENSP00000235310,9606.ENSP00000265433,9606.ENSP00000493536	ERCC1,MAD2L2,NBN,SAMHD1
GO:0000495	Box H/ACA RNA 3-end processing	2	2	2.14	0.53	0.0136	9606.ENSP00000358563,9606.ENSP00000387911	DKC1,PARN
GO:0000717	Nucleotide-excision repair, DNA duplex unwinding	2	2	2.14	0.53	0.0136	9606.ENSP00000285398,9606.ENSP00000375809	ERCC3,ERCC2
GO:0006295	Nucleotide-excision repair, DNA incision, 3-to lesion	2	2	2.14	0.53	0.0136	9606.ENSP00000310520,9606.ENSP00000498881	ERCC4,ERCC5
GO:0051641	Cellular localization	35	2677	0.26	0.34	0.0136	9606.ENSP00000238892,9606.ENSP00000249442,9606.ENSP00000258149,9606.ENSP00000267415,9606.ENSP00000275493,9606.ENSP00000278616,9606.ENSP00000285398,9606.ENSP00000287598,9606.ENSP00000293760,9606.ENSP00000298139,9606.ENSP00000309572,9606.ENSP00000315775,9606.ENSP00000324203,9606.ENSP00000325527,9606.ENSP00000339191,9606.ENSP00000343741,9606.ENSP00000343818,9606.ENSP00000345008,9606.ENSP00000349541,…	CRIPT,MTX2,MDM2,TINF2,EGFR,ATM,ERCC3,BUB1B,LEMD2,WRN,TERT,COG4,WRAP53,FBN1,CAV1,ATR,CDK5RAP2,FBLN5,CAVIN1,POT1,TOMM7,SMC5,LMNA,ADAR,SLF2,ZMPSTE24,XPA,BRCA2,NIN,LTBP1,PIK3R1,TOR1AIP1,SLC25A24,ACD,TREX1
GO:0097694	Establishment of RNA localization to telomere	2	2	2.14	0.53	0.0136	9606.ENSP00000278616,9606.ENSP00000343741	ATM,ATR
GO:0097695	Establishment of protein-containing complex localization to telomere	2	2	2.14	0.53	0.0136	9606.ENSP00000278616,9606.ENSP00000343741	ATM,ATR
GO:1901255	Nucleotide-excision repair involved in interstrand cross-link repair	2	2	2.14	0.53	0.0136	9606.ENSP00000310520,9606.ENSP00000364270	ERCC4,XPA
GO:1904884	Positive regulation of telomerase catalytic core complex assembly	2	2	2.14	0.53	0.0136	9606.ENSP00000278616,9606.ENSP00000343741	ATM,ATR
GO:1990426	Mitotic recombination-dependent replication fork processing	2	2	2.14	0.53	0.0136	9606.ENSP00000369497,9606.ENSP00000493712	BRCA2,RAD51
GO:0043009	Chordate embryonic development	14	654	0.47	0.39	0.0138	9606.ENSP00000261584,9606.ENSP00000265433,9606.ENSP00000270861,9606.ENSP00000275493,9606.ENSP00000278616,9606.ENSP00000330382,9606.ENSP00000337623,9606.ENSP00000352271,9606.ENSP00000369497,9606.ENSP00000375809,9606.ENSP00000382628,9606.ENSP00000405004,9606.ENSP00000418960,9606.ENSP00000501092	PALB2,NBN,PLK4,EGFR,ATM,PDGFB,RNASEH2B,XRCC2,BRCA2,ERCC2,RBBP8,ACVR1,BRCA1,TFAP2A
GO:0031952	Regulation of protein autophosphorylation	4	42	1.12	0.49	0.014	9606.ENSP00000265433,9606.ENSP00000325863,9606.ENSP00000330382,9606.ENSP00000339191	NBN,MRE11,PDGFB,CAV1
GO:0009451	RNA modification	7	177	0.74	0.44	0.0157	9606.ENSP00000261772,9606.ENSP00000274606,9606.ENSP00000332198,9606.ENSP00000357459,9606.ENSP00000358563,9606.ENSP00000362135,9606.ENSP00000387911	AARS1,NHP2,NOP10,ADAR,DKC1,YRDC,PARN
GO:0031573	Mitotic intra-S DNA damage checkpoint signaling	3	17	1.39	0.49	0.016	9606.ENSP00000285021,9606.ENSP00000287647,9606.ENSP00000325863	XPC,FANCD2,MRE11
GO:0051347	Positive regulation of transferase activity	13	586	0.49	0.39	0.0161	9606.ENSP00000265433,9606.ENSP00000275493,9606.ENSP00000324203,9606.ENSP00000325527,9606.ENSP00000325863,9606.ENSP00000330382,9606.ENSP00000348089,9606.ENSP00000350249,9606.ENSP00000356899,9606.ENSP00000358563,9606.ENSP00000368458,9606.ENSP00000387911,9606.ENSP00000483117	NBN,EGFR,WRAP53,FBN1,MRE11,PDGFB,ERCC6,POT1,DDR2,DKC1,PCNA,PARN,ACD
GO:0030330	DNA damage response, signal transduction by p53 class mediator	4	44	1.1	0.47	0.0163	9606.ENSP00000258149,9606.ENSP00000265433,9606.ENSP00000278616,9606.ENSP00000369497	MDM2,NBN,ATM,BRCA2
GO:1900368	Regulation of post-transcriptional gene silencing by RNA	4	44	1.1	0.47	0.0163	9606.ENSP00000275493,9606.ENSP00000309572,9606.ENSP00000357459,9606.ENSP00000361845	EGFR,TERT,ADAR,ZMPSTE24
GO:0000712	Resolution of meiotic recombination intermediates	3	18	1.36	0.48	0.0183	9606.ENSP00000267430,9606.ENSP00000294008,9606.ENSP00000310520	FANCM,SLX4,ERCC4
GO:0097659	Nucleic acid-templated transcription	12	519	0.51	0.38	0.0186	9606.ENSP00000166345,9606.ENSP00000262027,9606.ENSP00000285398,9606.ENSP00000309572,9606.ENSP00000348089,9606.ENSP00000348168,9606.ENSP00000349541,9606.ENSP00000358320,9606.ENSP00000361446,9606.ENSP00000375809,9606.ENSP00000428056,9606.ENSP00000476100	TRIP13,MARS1,ERCC3,TERT,ERCC6,GTF2E2,CAVIN1,POLR3GL,POLR3A,ERCC2,PIK3R1,GTF2H5
GO:0007281	Germ cell development	9	307	0.61	0.4	0.0191	9606.ENSP00000013807,9606.ENSP00000166345,9606.ENSP00000259008,9606.ENSP00000278616,9606.ENSP00000289081,9606.ENSP00000317902,9606.ENSP00000367910,9606.ENSP00000369497,9606.ENSP00000405004	ERCC1,TRIP13,BRIP1,ATM,FANCC,CEP57,FANCG,BRCA2,ACVR1
GO:0018205	Peptidyl-lysine modification	9	311	0.6	0.39	0.0206	9606.ENSP00000258149,9606.ENSP00000287437,9606.ENSP00000307705,9606.ENSP00000354957,9606.ENSP00000359292,9606.ENSP00000360497,9606.ENSP00000361845,9606.ENSP00000369497,9606.ENSP00000497271	MDM2,NSMCE2,H1-4,SMC5,SLF2,RNF113A,ZMPSTE24,BRCA2,IFIH1
GO:0048569	Post-embryonic animal organ development	3	19	1.34	0.46	0.0206	9606.ENSP00000013807,9606.ENSP00000325527,9606.ENSP00000378058	ERCC1,FBN1,EFEMP1
GO:0060339	Negative regulation of type I interferon-mediated signaling pathway	3	19	1.34	0.46	0.0206	9606.ENSP00000357459,9606.ENSP00000486676,9606.ENSP00000493536	ADAR,TREX1,SAMHD1
GO:0061819	Telomeric DNA-containing double minutes formation	2	3	1.97	0.48	0.0206	9606.ENSP00000013807,9606.ENSP00000310520	ERCC1,ERCC4
GO:0071932	Replication fork reversal	2	3	1.97	0.48	0.0206	9606.ENSP00000267430,9606.ENSP00000351185	FANCM,DNA2
GO:1905765	Negative regulation of protection from non-homologous end joining at telomere	2	3	1.97	0.48	0.0206	9606.ENSP00000013807,9606.ENSP00000310520	ERCC1,ERCC4
GO:0010035	Response to inorganic substance	12	532	0.5	0.37	0.022	9606.ENSP00000013807,9606.ENSP00000275493,9606.ENSP00000289081,9606.ENSP00000309572,9606.ENSP00000339191,9606.ENSP00000347232,9606.ENSP00000348089,9606.ENSP00000368458,9606.ENSP00000457733,9606.ENSP00000486676,9606.ENSP00000493712,9606.ENSP00000501092	ERCC1,EGFR,FANCC,TERT,CAV1,BLM,ERCC6,PCNA,SLC25A24,TREX1,RAD51,TFAP2A
GO:0016072	rRNA metabolic process	8	250	0.65	0.39	0.022	9606.ENSP00000262027,9606.ENSP00000274606,9606.ENSP00000332198,9606.ENSP00000349541,9606.ENSP00000358563,9606.ENSP00000361433,9606.ENSP00000375809,9606.ENSP00000476100	MARS1,NHP2,NOP10,CAVIN1,DKC1,EXOSC2,ERCC2,GTF2H5
GO:0001832	Blastocyst growth	3	21	1.3	0.43	0.0259	9606.ENSP00000261584,9606.ENSP00000265433,9606.ENSP00000369497	PALB2,NBN,BRCA2
GO:0008340	Determination of adult lifespan	3	21	1.3	0.43	0.0259	9606.ENSP00000278616,9606.ENSP00000361845,9606.ENSP00000486676	ATM,ZMPSTE24,TREX1
GO:1900369	Negative regulation of post-transcriptional gene silencing by RNA	3	21	1.3	0.43	0.0259	9606.ENSP00000309572,9606.ENSP00000357459,9606.ENSP00000361845	TERT,ADAR,ZMPSTE24
GO:0007129	Homologous chromosome pairing at meiosis	4	52	1.03	0.41	0.0271	9606.ENSP00000166345,9606.ENSP00000259008,9606.ENSP00000287647,9606.ENSP00000325863	TRIP13,BRIP1,FANCD2,MRE11
GO:0009791	Post-embryonic development	5	94	0.87	0.4	0.0285	9606.ENSP00000013807,9606.ENSP00000278616,9606.ENSP00000325527,9606.ENSP00000375809,9606.ENSP00000378058	ERCC1,ATM,FBN1,ERCC2,EFEMP1
GO:0000706	Meiotic DNA double-strand break processing	2	4	1.84	0.43	0.0291	9606.ENSP00000259008,9606.ENSP00000294008	BRIP1,SLX4
GO:0000720	Pyrimidine dimer repair by nucleotide-excision repair	2	4	1.84	0.43	0.0291	9606.ENSP00000013807,9606.ENSP00000285021	ERCC1,XPC
GO:0000730	DNA recombinase assembly	2	4	1.84	0.43	0.0291	9606.ENSP00000336701,9606.ENSP00000493712	RAD51C,RAD51
GO:0035583	Sequestering of TGFbeta in extracellular matrix	2	4	1.84	0.43	0.0291	9606.ENSP00000325527,9606.ENSP00000386043	FBN1,LTBP1
GO:0043137	DNA replication, removal of RNA primer	2	4	1.84	0.43	0.0291	9606.ENSP00000221486,9606.ENSP00000351185	RNASEH2A,DNA2
GO:0072757	Cellular response to camptothecin	2	4	1.84	0.43	0.0291	9606.ENSP00000347232,9606.ENSP00000493712	BLM,RAD51
GO:0090669	Telomerase RNA stabilization	2	4	1.84	0.43	0.0291	9606.ENSP00000358563,9606.ENSP00000387911	DKC1,PARN
GO:1904431	Positive regulation of t-circle formation	2	4	1.84	0.43	0.0291	9606.ENSP00000013807,9606.ENSP00000294008	ERCC1,SLX4
GO:0043066	Negative regulation of apoptotic process	16	891	0.4	0.33	0.0299	9606.ENSP00000258149,9606.ENSP00000261584,9606.ENSP00000261772,9606.ENSP00000275493,9606.ENSP00000309572,9606.ENSP00000325863,9606.ENSP00000339191,9606.ENSP00000352271,9606.ENSP00000356899,9606.ENSP00000357283,9606.ENSP00000357459,9606.ENSP00000405004,9606.ENSP00000418960,9606.ENSP00000428056,9606.ENSP00000498881,9606.ENSP00000501092	MDM2,PALB2,AARS1,EGFR,TERT,MRE11,CAV1,XRCC2,DDR2,LMNA,ADAR,ACVR1,BRCA1,PIK3R1,ERCC5,TFAP2A
GO:0072594	Establishment of protein localization to organelle	9	335	0.57	0.35	0.032	9606.ENSP00000249442,9606.ENSP00000309572,9606.ENSP00000350249,9606.ENSP00000351214,9606.ENSP00000357283,9606.ENSP00000357459,9606.ENSP00000369497,9606.ENSP00000428056,9606.ENSP00000483117	MTX2,TERT,POT1,TOMM7,LMNA,ADAR,BRCA2,PIK3R1,ACD
GO:0031399	Regulation of protein modification process	23	1560	0.31	0.3	0.0323	9606.ENSP00000235310,9606.ENSP00000265433,9606.ENSP00000267415,9606.ENSP00000267430,9606.ENSP00000275493,9606.ENSP00000278616,9606.ENSP00000287598,9606.ENSP00000295050,9606.ENSP00000310842,9606.ENSP00000325527,9606.ENSP00000325863,9606.ENSP00000330382,9606.ENSP00000339191,9606.ENSP00000343818,9606.ENSP00000347232,9606.ENSP00000348089,9606.ENSP00000356899,9606.ENSP00000357283,9606.ENSP00000357459,…	MAD2L2,NBN,TINF2,FANCM,EGFR,ATM,BUB1B,SPRTN,FANCI,FBN1,MRE11,PDGFB,CAV1,CDK5RAP2,BLM,ERCC6,DDR2,LMNA,ADAR,ZMPSTE24,ACVR1,BRCA1,RAD51
GO:0071425	Hematopoietic stem cell proliferation	3	24	1.24	0.4	0.0348	9606.ENSP00000369497,9606.ENSP00000375809,9606.ENSP00000498499	BRCA2,ERCC2,CTC1
GO:1904385	Cellular response to angiotensin	3	24	1.24	0.4	0.0348	9606.ENSP00000259008,9606.ENSP00000339191,9606.ENSP00000356899	BRIP1,CAV1,DDR2
GO:0090501	RNA phosphodiester bond hydrolysis	6	153	0.74	0.36	0.0375	9606.ENSP00000219281,9606.ENSP00000221486,9606.ENSP00000274606,9606.ENSP00000361433,9606.ENSP00000387911,9606.ENSP00000493536	USB1,RNASEH2A,NHP2,EXOSC2,PARN,SAMHD1
GO:0031396	Regulation of protein ubiquitination	7	212	0.66	0.35	0.0381	9606.ENSP00000235310,9606.ENSP00000267430,9606.ENSP00000287598,9606.ENSP00000295050,9606.ENSP00000310842,9606.ENSP00000339191,9606.ENSP00000418960	MAD2L2,FANCM,BUB1B,SPRTN,FANCI,CAV1,BRCA1
GO:0007292	Female gamete generation	6	154	0.73	0.35	0.0385	9606.ENSP00000013807,9606.ENSP00000166345,9606.ENSP00000278616,9606.ENSP00000336701,9606.ENSP00000369497,9606.ENSP00000387911	ERCC1,TRIP13,ATM,RAD51C,BRCA2,PARN
GO:0042148	Strand invasion	2	5	1.74	0.4	0.0386	9606.ENSP00000352271,9606.ENSP00000493712	XRCC2,RAD51
GO:0051418	Microtubule nucleation by microtubule organizing center	2	5	1.74	0.4	0.0386	9606.ENSP00000371308,9606.ENSP00000371472	CPAP,NIN
GO:0070987	Error-free translesion synthesis	2	5	1.74	0.4	0.0386	9606.ENSP00000361310,9606.ENSP00000472445	POLH,POLD1
GO:0090666	scaRNA localization to Cajal body	2	5	1.74	0.4	0.0386	9606.ENSP00000324203,9606.ENSP00000358563	WRAP53,DKC1
GO:1904742	Regulation of telomeric DNA binding	2	5	1.74	0.4	0.0386	9606.ENSP00000310520,9606.ENSP00000483117	ERCC4,ACD
GO:0001666	Response to hypoxia	8	278	0.6	0.34	0.0389	9606.ENSP00000258149,9606.ENSP00000259008,9606.ENSP00000278616,9606.ENSP00000285398,9606.ENSP00000309572,9606.ENSP00000339191,9606.ENSP00000356899,9606.ENSP00000357283	MDM2,BRIP1,ATM,ERCC3,TERT,CAV1,DDR2,LMNA
GO:0032479	Regulation of type I interferon production	5	103	0.83	0.36	0.0391	9606.ENSP00000328203,9606.ENSP00000361446,9606.ENSP00000433760,9606.ENSP00000486676,9606.ENSP00000497271	TRAIP,POLR3A,BANF1,TREX1,IFIH1
GO:0046686	Response to cadmium ion	4	59	0.97	0.37	0.0391	9606.ENSP00000013807,9606.ENSP00000275493,9606.ENSP00000309572,9606.ENSP00000368458	ERCC1,EGFR,TERT,PCNA
GO:0031954	Positive regulation of protein autophosphorylation	3	26	1.2	0.38	0.0412	9606.ENSP00000265433,9606.ENSP00000325863,9606.ENSP00000330382	NBN,MRE11,PDGFB
GO:1903798	Regulation of miRNA maturation	3	26	1.2	0.38	0.0412	9606.ENSP00000275493,9606.ENSP00000309572,9606.ENSP00000361845	EGFR,TERT,ZMPSTE24
GO:0060548	Negative regulation of cell death	17	1016	0.37	0.3	0.0415	9606.ENSP00000258149,9606.ENSP00000261584,9606.ENSP00000261772,9606.ENSP00000275493,9606.ENSP00000309572,9606.ENSP00000325863,9606.ENSP00000339191,9606.ENSP00000352271,9606.ENSP00000356899,9606.ENSP00000357283,9606.ENSP00000357459,9606.ENSP00000384949,9606.ENSP00000405004,9606.ENSP00000418960,9606.ENSP00000428056,9606.ENSP00000498881,9606.ENSP00000501092	MDM2,PALB2,AARS1,EGFR,TERT,MRE11,CAV1,XRCC2,DDR2,LMNA,ADAR,PYCR1,ACVR1,BRCA1,PIK3R1,ERCC5,TFAP2A
GO:1904705	Regulation of vascular associated smooth muscle cell proliferation	4	61	0.96	0.36	0.0434	9606.ENSP00000309572,9606.ENSP00000309953,9606.ENSP00000330382,9606.ENSP00000356899	TERT,EFEMP2,PDGFB,DDR2
GO:0002208	Somatic diversification of immunoglobulins involved in immune response	3	27	1.19	0.37	0.0451	9606.ENSP00000013807,9606.ENSP00000235310,9606.ENSP00000265433	ERCC1,MAD2L2,NBN
GO:0007276	Gamete generation	14	756	0.41	0.3	0.0451	9606.ENSP00000013807,9606.ENSP00000166345,9606.ENSP00000259008,9606.ENSP00000278616,9606.ENSP00000287647,9606.ENSP00000289081,9606.ENSP00000317902,9606.ENSP00000336701,9606.ENSP00000367910,9606.ENSP00000369497,9606.ENSP00000373952,9606.ENSP00000385021,9606.ENSP00000387911,9606.ENSP00000405004	ERCC1,TRIP13,BRIP1,ATM,FANCD2,FANCC,CEP57,RAD51C,FANCG,BRCA2,FANCA,FANCL,PARN,ACVR1
GO:0031123	RNA 3-end processing	5	107	0.81	0.34	0.0451	9606.ENSP00000219281,9606.ENSP00000286307,9606.ENSP00000358563,9606.ENSP00000361433,9606.ENSP00000387911	USB1,LSM11,DKC1,EXOSC2,PARN
GO:0007141	Male meiosis I	3	28	1.17	0.36	0.0489	9606.ENSP00000166345,9606.ENSP00000336701,9606.ENSP00000369497	TRIP13,RAD51C,BRCA2
GO:0034599	Cellular response to oxidative stress	7	224	0.64	0.32	0.0489	9606.ENSP00000275493,9606.ENSP00000287647,9606.ENSP00000289081,9606.ENSP00000368458,9606.ENSP00000384949,9606.ENSP00000457733,9606.ENSP00000486676	EGFR,FANCD2,FANCC,PCNA,PYCR1,SLC25A24,TREX1
GO:0071139	Resolution of recombination intermediates	2	6	1.67	0.37	0.0489	9606.ENSP00000321636,9606.ENSP00000347232	TOP3A,BLM
GO:0097680	Double-strand break repair via classical nonhomologous end joining	2	6	1.67	0.37	0.0489	9606.ENSP00000265038,9606.ENSP00000348089	ERCC8,ERCC6
GO:1990918	Double-strand break repair involved in meiotic recombination	2	6	1.67	0.37	0.0489	9606.ENSP00000259008,9606.ENSP00000287647	BRIP1,FANCD2
GO:2000348	Regulation of CD40 signaling pathway	2	6	1.67	0.37	0.0489	9606.ENSP00000287647,9606.ENSP00000373952	FANCD2,FANCA
GO:2000618	Regulation of histone H4-K16 acetylation	2	6	1.67	0.37	0.0489	9606.ENSP00000361845,9606.ENSP00000418960	ZMPSTE24,BRCA1
