# Supplementary material for: A manually curated gene–phenotype catalogue for progeroid syndromes and premature aging
Source: Aging (Albany NY). 2026 Mar 30;18(1):234–60. doi: 10.18632/aging.206366 (PMC13285954; doi:10.18632/aging.206366)
Supplement: Supplementary Table 4 [file aging-18-1-206366-s004.xlsx]

## Sheet: enrichment.RCTM
Supplementary Table 4. Complete Reactome pathway enrichment results from STRING.
#term ID	term description	observed gene count	background gene count	strength	signal	false discovery rate	matching proteins in your network (IDs)	matching proteins in your network (labels)
HSA-73894	DNA Repair	50	310	1.35	6.21	1.01e-47	9606.ENSP00000013807,9606.ENSP00000229769,9606.ENSP00000235310,9606.ENSP00000256996,9606.ENSP00000259008,9606.ENSP00000261584,9606.ENSP00000265038,9606.ENSP00000265433,9606.ENSP00000267415,9606.ENSP00000267430,9606.ENSP00000278616,9606.ENSP00000285021,9606.ENSP00000285398,9606.ENSP00000287647,9606.ENSP00000289081,9606.ENSP00000294008,9606.ENSP00000295050,9606.ENSP00000298139,9606.ENSP00000310520,…	ERCC1,FANCE,MAD2L2,DDB2,BRIP1,PALB2,ERCC8,NBN,TINF2,FANCM,ATM,XPC,ERCC3,FANCD2,FANCC,SLX4,SPRTN,WRN,ERCC4,FANCI,TOP3A,ATRIP,MRE11,FANCF,RAD51C,ATR,BLM,ERCC6,POT1,DNA2,XRCC2,RTEL1,POLH,XPA,FANCG,PCNA,BRCA2,FANCA,ERCC2,RBBP8,FANCL,BRCA1,POLD1,GTF2H5,ACD,RAD51,UBE2T,DCLRE1B,FANCB,ERCC5
HSA-5685942	HDR through Homologous Recombination (HRR)	22	66	1.67	5.42	2.73e-25	9606.ENSP00000259008,9606.ENSP00000261584,9606.ENSP00000265433,9606.ENSP00000278616,9606.ENSP00000294008,9606.ENSP00000298139,9606.ENSP00000321636,9606.ENSP00000323099,9606.ENSP00000325863,9606.ENSP00000336701,9606.ENSP00000343741,9606.ENSP00000347232,9606.ENSP00000351185,9606.ENSP00000352271,9606.ENSP00000353332,9606.ENSP00000361310,9606.ENSP00000368458,9606.ENSP00000369497,9606.ENSP00000382628,…	BRIP1,PALB2,NBN,ATM,SLX4,WRN,TOP3A,ATRIP,MRE11,RAD51C,ATR,BLM,DNA2,XRCC2,RTEL1,POLH,PCNA,BRCA2,RBBP8,BRCA1,POLD1,RAD51
HSA-1640170	Cell Cycle	42	658	0.95	2.73	1.7e-24	9606.ENSP00000224950,9606.ENSP00000258149,9606.ENSP00000259008,9606.ENSP00000265433,9606.ENSP00000267415,9606.ENSP00000270861,9606.ENSP00000274606,9606.ENSP00000278616,9606.ENSP00000287598,9606.ENSP00000293760,9606.ENSP00000298139,9606.ENSP00000309572,9606.ENSP00000315644,9606.ENSP00000317902,9606.ENSP00000321636,9606.ENSP00000323099,9606.ENSP00000324203,9606.ENSP00000325863,9606.ENSP00000332198,…	STN1,MDM2,BRIP1,NBN,TINF2,PLK4,NHP2,ATM,BUB1B,LEMD2,WRN,TERT,TYMS,CEP57,TOP3A,ATRIP,WRAP53,MRE11,NOP10,CEP63,RAD51C,ANAPC1,ATR,CDK5RAP2,BLM,POT1,DNA2,PCNT,RTEL1,LMNA,DKC1,PCNA,BRCA2,CEP152,CPAP,RBBP8,BRCA1,BANF1,POLD1,ACD,RAD51,CTC1
HSA-5693567	HDR through Homologous Recombination (HRR) or Single Strand Annealing (SSA)	24	113	1.47	4.63	4.55e-24	9606.ENSP00000013807,9606.ENSP00000259008,9606.ENSP00000261584,9606.ENSP00000265433,9606.ENSP00000278616,9606.ENSP00000294008,9606.ENSP00000298139,9606.ENSP00000310520,9606.ENSP00000321636,9606.ENSP00000323099,9606.ENSP00000325863,9606.ENSP00000336701,9606.ENSP00000343741,9606.ENSP00000347232,9606.ENSP00000351185,9606.ENSP00000352271,9606.ENSP00000353332,9606.ENSP00000361310,9606.ENSP00000368458,…	ERCC1,BRIP1,PALB2,NBN,ATM,SLX4,WRN,ERCC4,TOP3A,ATRIP,MRE11,RAD51C,ATR,BLM,DNA2,XRCC2,RTEL1,POLH,PCNA,BRCA2,RBBP8,BRCA1,POLD1,RAD51
HSA-5693537	Resolution of D-Loop Structures	17	33	1.85	5.25	3.87e-22	9606.ENSP00000259008,9606.ENSP00000261584,9606.ENSP00000265433,9606.ENSP00000278616,9606.ENSP00000294008,9606.ENSP00000298139,9606.ENSP00000321636,9606.ENSP00000325863,9606.ENSP00000336701,9606.ENSP00000347232,9606.ENSP00000351185,9606.ENSP00000352271,9606.ENSP00000353332,9606.ENSP00000369497,9606.ENSP00000382628,9606.ENSP00000418960,9606.ENSP00000493712	BRIP1,PALB2,NBN,ATM,SLX4,WRN,TOP3A,MRE11,RAD51C,BLM,DNA2,XRCC2,RTEL1,BRCA2,RBBP8,BRCA1,RAD51
HSA-5693554	Resolution of D-loop Structures through Synthesis-Dependent Strand Annealing (SDSA)	16	26	1.93	5.29	9.11e-22	9606.ENSP00000259008,9606.ENSP00000261584,9606.ENSP00000265433,9606.ENSP00000278616,9606.ENSP00000298139,9606.ENSP00000321636,9606.ENSP00000325863,9606.ENSP00000336701,9606.ENSP00000347232,9606.ENSP00000351185,9606.ENSP00000352271,9606.ENSP00000353332,9606.ENSP00000369497,9606.ENSP00000382628,9606.ENSP00000418960,9606.ENSP00000493712	BRIP1,PALB2,NBN,ATM,WRN,TOP3A,MRE11,RAD51C,BLM,DNA2,XRCC2,RTEL1,BRCA2,RBBP8,BRCA1,RAD51
HSA-6783310	Fanconi Anemia Pathway	17	37	1.8	5.06	1.21e-21	9606.ENSP00000013807,9606.ENSP00000229769,9606.ENSP00000267430,9606.ENSP00000287647,9606.ENSP00000289081,9606.ENSP00000294008,9606.ENSP00000310520,9606.ENSP00000310842,9606.ENSP00000323099,9606.ENSP00000330875,9606.ENSP00000343741,9606.ENSP00000367910,9606.ENSP00000373952,9606.ENSP00000385021,9606.ENSP00000494957,9606.ENSP00000498042,9606.ENSP00000498215	ERCC1,FANCE,FANCM,FANCD2,FANCC,SLX4,ERCC4,FANCI,ATRIP,FANCF,ATR,FANCG,FANCA,FANCL,UBE2T,DCLRE1B,FANCB
HSA-9701190	Defective homologous recombination repair (HRR) due to BRCA2 loss of function	17	40	1.77	4.91	3.16e-21	9606.ENSP00000259008,9606.ENSP00000261584,9606.ENSP00000265433,9606.ENSP00000278616,9606.ENSP00000298139,9606.ENSP00000321636,9606.ENSP00000323099,9606.ENSP00000325863,9606.ENSP00000336701,9606.ENSP00000343741,9606.ENSP00000347232,9606.ENSP00000351185,9606.ENSP00000352271,9606.ENSP00000369497,9606.ENSP00000382628,9606.ENSP00000418960,9606.ENSP00000493712	BRIP1,PALB2,NBN,ATM,WRN,TOP3A,ATRIP,MRE11,RAD51C,ATR,BLM,DNA2,XRCC2,BRCA2,RBBP8,BRCA1,RAD51
HSA-5693579	Homologous DNA Pairing and Strand Exchange	17	42	1.75	4.83	5.17e-21	9606.ENSP00000259008,9606.ENSP00000261584,9606.ENSP00000265433,9606.ENSP00000278616,9606.ENSP00000298139,9606.ENSP00000321636,9606.ENSP00000323099,9606.ENSP00000325863,9606.ENSP00000336701,9606.ENSP00000343741,9606.ENSP00000347232,9606.ENSP00000351185,9606.ENSP00000352271,9606.ENSP00000369497,9606.ENSP00000382628,9606.ENSP00000418960,9606.ENSP00000493712	BRIP1,PALB2,NBN,ATM,WRN,TOP3A,ATRIP,MRE11,RAD51C,ATR,BLM,DNA2,XRCC2,BRCA2,RBBP8,BRCA1,RAD51
HSA-5693568	Resolution of D-loop Structures through Holliday Junction Intermediates	16	32	1.84	4.97	6.48e-21	9606.ENSP00000259008,9606.ENSP00000261584,9606.ENSP00000265433,9606.ENSP00000278616,9606.ENSP00000294008,9606.ENSP00000298139,9606.ENSP00000321636,9606.ENSP00000325863,9606.ENSP00000336701,9606.ENSP00000347232,9606.ENSP00000351185,9606.ENSP00000352271,9606.ENSP00000369497,9606.ENSP00000382628,9606.ENSP00000418960,9606.ENSP00000493712	BRIP1,PALB2,NBN,ATM,SLX4,WRN,TOP3A,MRE11,RAD51C,BLM,DNA2,XRCC2,BRCA2,RBBP8,BRCA1,RAD51
HSA-9701192	Defective homologous recombination repair (HRR) due to BRCA1 loss of function	15	24	1.94	5.06	1.1e-20	9606.ENSP00000259008,9606.ENSP00000261584,9606.ENSP00000265433,9606.ENSP00000278616,9606.ENSP00000298139,9606.ENSP00000321636,9606.ENSP00000325863,9606.ENSP00000336701,9606.ENSP00000347232,9606.ENSP00000351185,9606.ENSP00000352271,9606.ENSP00000369497,9606.ENSP00000382628,9606.ENSP00000418960,9606.ENSP00000493712	BRIP1,PALB2,NBN,ATM,WRN,TOP3A,MRE11,RAD51C,BLM,DNA2,XRCC2,BRCA2,RBBP8,BRCA1,RAD51
HSA-9704331	Defective HDR through Homologous Recombination Repair (HRR) due to PALB2 loss of BRCA1 binding function	15	24	1.94	5.06	1.1e-20	9606.ENSP00000259008,9606.ENSP00000261584,9606.ENSP00000265433,9606.ENSP00000278616,9606.ENSP00000298139,9606.ENSP00000321636,9606.ENSP00000325863,9606.ENSP00000336701,9606.ENSP00000347232,9606.ENSP00000351185,9606.ENSP00000352271,9606.ENSP00000369497,9606.ENSP00000382628,9606.ENSP00000418960,9606.ENSP00000493712	BRIP1,PALB2,NBN,ATM,WRN,TOP3A,MRE11,RAD51C,BLM,DNA2,XRCC2,BRCA2,RBBP8,BRCA1,RAD51
HSA-9704646	Defective HDR through Homologous Recombination Repair (HRR) due to PALB2 loss of BRCA2/RAD51/RAD51C binding function	15	24	1.94	5.06	1.1e-20	9606.ENSP00000259008,9606.ENSP00000261584,9606.ENSP00000265433,9606.ENSP00000278616,9606.ENSP00000298139,9606.ENSP00000321636,9606.ENSP00000325863,9606.ENSP00000336701,9606.ENSP00000347232,9606.ENSP00000351185,9606.ENSP00000352271,9606.ENSP00000369497,9606.ENSP00000382628,9606.ENSP00000418960,9606.ENSP00000493712	BRIP1,PALB2,NBN,ATM,WRN,TOP3A,MRE11,RAD51C,BLM,DNA2,XRCC2,BRCA2,RBBP8,BRCA1,RAD51
HSA-9709603	Impaired BRCA2 binding to PALB2	15	24	1.94	5.06	1.1e-20	9606.ENSP00000259008,9606.ENSP00000261584,9606.ENSP00000265433,9606.ENSP00000278616,9606.ENSP00000298139,9606.ENSP00000321636,9606.ENSP00000325863,9606.ENSP00000336701,9606.ENSP00000347232,9606.ENSP00000351185,9606.ENSP00000352271,9606.ENSP00000369497,9606.ENSP00000382628,9606.ENSP00000418960,9606.ENSP00000493712	BRIP1,PALB2,NBN,ATM,WRN,TOP3A,MRE11,RAD51C,BLM,DNA2,XRCC2,BRCA2,RBBP8,BRCA1,RAD51
HSA-5693616	Presynaptic phase of homologous DNA pairing and strand exchange	16	39	1.76	4.64	5.33e-20	9606.ENSP00000259008,9606.ENSP00000265433,9606.ENSP00000278616,9606.ENSP00000298139,9606.ENSP00000321636,9606.ENSP00000323099,9606.ENSP00000325863,9606.ENSP00000336701,9606.ENSP00000343741,9606.ENSP00000347232,9606.ENSP00000351185,9606.ENSP00000352271,9606.ENSP00000369497,9606.ENSP00000382628,9606.ENSP00000418960,9606.ENSP00000493712	BRIP1,NBN,ATM,WRN,TOP3A,ATRIP,MRE11,RAD51C,ATR,BLM,DNA2,XRCC2,BRCA2,RBBP8,BRCA1,RAD51
HSA-5685938	HDR through Single Strand Annealing (SSA)	15	37	1.75	4.35	1.21e-18	9606.ENSP00000013807,9606.ENSP00000259008,9606.ENSP00000265433,9606.ENSP00000278616,9606.ENSP00000298139,9606.ENSP00000310520,9606.ENSP00000321636,9606.ENSP00000323099,9606.ENSP00000325863,9606.ENSP00000343741,9606.ENSP00000347232,9606.ENSP00000351185,9606.ENSP00000382628,9606.ENSP00000418960,9606.ENSP00000493712	ERCC1,BRIP1,NBN,ATM,WRN,ERCC4,TOP3A,ATRIP,MRE11,ATR,BLM,DNA2,RBBP8,BRCA1,RAD51
HSA-180786	Extension of Telomeres	16	51	1.64	4.14	1.7e-18	9606.ENSP00000224950,9606.ENSP00000267415,9606.ENSP00000274606,9606.ENSP00000298139,9606.ENSP00000309572,9606.ENSP00000324203,9606.ENSP00000332198,9606.ENSP00000347232,9606.ENSP00000350249,9606.ENSP00000351185,9606.ENSP00000353332,9606.ENSP00000358563,9606.ENSP00000368458,9606.ENSP00000472445,9606.ENSP00000483117,9606.ENSP00000498499	STN1,TINF2,NHP2,WRN,TERT,WRAP53,NOP10,BLM,POT1,DNA2,RTEL1,DKC1,PCNA,POLD1,ACD,CTC1
HSA-9709570	Impaired BRCA2 binding to RAD51	14	34	1.76	4.11	1.87e-17	9606.ENSP00000259008,9606.ENSP00000265433,9606.ENSP00000278616,9606.ENSP00000298139,9606.ENSP00000321636,9606.ENSP00000323099,9606.ENSP00000325863,9606.ENSP00000343741,9606.ENSP00000347232,9606.ENSP00000351185,9606.ENSP00000369497,9606.ENSP00000382628,9606.ENSP00000418960,9606.ENSP00000493712	BRIP1,NBN,ATM,WRN,TOP3A,ATRIP,MRE11,ATR,BLM,DNA2,BRCA2,RBBP8,BRCA1,RAD51
HSA-1500620	Meiosis	15	88	1.37	2.87	6.79e-14	9606.ENSP00000265433,9606.ENSP00000267415,9606.ENSP00000278616,9606.ENSP00000321636,9606.ENSP00000325863,9606.ENSP00000336701,9606.ENSP00000343741,9606.ENSP00000347232,9606.ENSP00000350249,9606.ENSP00000357283,9606.ENSP00000369497,9606.ENSP00000382628,9606.ENSP00000418960,9606.ENSP00000483117,9606.ENSP00000493712	NBN,TINF2,ATM,TOP3A,MRE11,RAD51C,ATR,BLM,POT1,LMNA,BRCA2,RBBP8,BRCA1,ACD,RAD51
HSA-3700989	Transcriptional Regulation by TP53	22	361	0.93	1.87	3.73e-12	9606.ENSP00000256996,9606.ENSP00000258149,9606.ENSP00000259008,9606.ENSP00000265433,9606.ENSP00000278616,9606.ENSP00000285398,9606.ENSP00000287647,9606.ENSP00000289081,9606.ENSP00000298139,9606.ENSP00000310842,9606.ENSP00000321636,9606.ENSP00000323099,9606.ENSP00000325863,9606.ENSP00000343741,9606.ENSP00000347232,9606.ENSP00000351185,9606.ENSP00000368458,9606.ENSP00000371308,9606.ENSP00000375809,…	DDB2,MDM2,BRIP1,NBN,ATM,ERCC3,FANCD2,FANCC,WRN,FANCI,TOP3A,ATRIP,MRE11,ATR,BLM,DNA2,PCNA,CPAP,ERCC2,RBBP8,BRCA1,GTF2H5
HSA-174417	Telomere C-strand (Lagging Strand) Synthesis	10	34	1.61	2.6	4.06e-11	9606.ENSP00000224950,9606.ENSP00000267415,9606.ENSP00000298139,9606.ENSP00000347232,9606.ENSP00000350249,9606.ENSP00000351185,9606.ENSP00000368458,9606.ENSP00000472445,9606.ENSP00000483117,9606.ENSP00000498499	STN1,TINF2,WRN,BLM,POT1,DNA2,PCNA,POLD1,ACD,CTC1
HSA-6804756	Regulation of TP53 Activity through Phosphorylation	13	92	1.29	2.29	4.48e-11	9606.ENSP00000258149,9606.ENSP00000259008,9606.ENSP00000265433,9606.ENSP00000278616,9606.ENSP00000298139,9606.ENSP00000321636,9606.ENSP00000323099,9606.ENSP00000325863,9606.ENSP00000343741,9606.ENSP00000347232,9606.ENSP00000351185,9606.ENSP00000382628,9606.ENSP00000418960	MDM2,BRIP1,NBN,ATM,WRN,TOP3A,ATRIP,MRE11,ATR,BLM,DNA2,RBBP8,BRCA1
HSA-171319	Telomere Extension By Telomerase	9	23	1.73	2.63	6.85e-11	9606.ENSP00000267415,9606.ENSP00000274606,9606.ENSP00000309572,9606.ENSP00000324203,9606.ENSP00000332198,9606.ENSP00000350249,9606.ENSP00000353332,9606.ENSP00000358563,9606.ENSP00000483117	TINF2,NHP2,TERT,WRAP53,NOP10,POT1,RTEL1,DKC1,ACD
HSA-69473	G2/M DNA damage checkpoint	12	77	1.33	2.26	1.19e-10	9606.ENSP00000259008,9606.ENSP00000265433,9606.ENSP00000278616,9606.ENSP00000298139,9606.ENSP00000321636,9606.ENSP00000323099,9606.ENSP00000325863,9606.ENSP00000343741,9606.ENSP00000347232,9606.ENSP00000351185,9606.ENSP00000382628,9606.ENSP00000418960	BRIP1,NBN,ATM,WRN,TOP3A,ATRIP,MRE11,ATR,BLM,DNA2,RBBP8,BRCA1
HSA-5693607	Processing of DNA double-strand break ends	12	80	1.32	2.21	1.74e-10	9606.ENSP00000259008,9606.ENSP00000265433,9606.ENSP00000278616,9606.ENSP00000298139,9606.ENSP00000321636,9606.ENSP00000323099,9606.ENSP00000325863,9606.ENSP00000343741,9606.ENSP00000347232,9606.ENSP00000351185,9606.ENSP00000382628,9606.ENSP00000418960	BRIP1,NBN,ATM,WRN,TOP3A,ATRIP,MRE11,ATR,BLM,DNA2,RBBP8,BRCA1
HSA-5696400	Dual Incision in GG-NER	10	41	1.53	2.4	1.74e-10	9606.ENSP00000013807,9606.ENSP00000256996,9606.ENSP00000285398,9606.ENSP00000310520,9606.ENSP00000364270,9606.ENSP00000368458,9606.ENSP00000375809,9606.ENSP00000472445,9606.ENSP00000476100,9606.ENSP00000498881	ERCC1,DDB2,ERCC3,ERCC4,XPA,PCNA,ERCC2,POLD1,GTF2H5,ERCC5
HSA-5696398	Nucleotide Excision Repair	13	109	1.22	2.07	2.72e-10	9606.ENSP00000013807,9606.ENSP00000256996,9606.ENSP00000265038,9606.ENSP00000285021,9606.ENSP00000285398,9606.ENSP00000310520,9606.ENSP00000348089,9606.ENSP00000364270,9606.ENSP00000368458,9606.ENSP00000375809,9606.ENSP00000472445,9606.ENSP00000476100,9606.ENSP00000498881	ERCC1,DDB2,ERCC8,XPC,ERCC3,ERCC4,ERCC6,XPA,PCNA,ERCC2,POLD1,GTF2H5,ERCC5
HSA-6782135	Dual incision in TC-NER	11	65	1.37	2.19	4.16e-10	9606.ENSP00000013807,9606.ENSP00000265038,9606.ENSP00000285398,9606.ENSP00000310520,9606.ENSP00000348089,9606.ENSP00000364270,9606.ENSP00000368458,9606.ENSP00000375809,9606.ENSP00000472445,9606.ENSP00000476100,9606.ENSP00000498881	ERCC1,ERCC8,ERCC3,ERCC4,ERCC6,XPA,PCNA,ERCC2,POLD1,GTF2H5,ERCC5
HSA-174414	Processive synthesis on the C-strand of the telomere	8	19	1.77	2.41	6.89e-10	9606.ENSP00000267415,9606.ENSP00000298139,9606.ENSP00000347232,9606.ENSP00000350249,9606.ENSP00000351185,9606.ENSP00000368458,9606.ENSP00000472445,9606.ENSP00000483117	TINF2,WRN,BLM,POT1,DNA2,PCNA,POLD1,ACD
HSA-912446	Meiotic recombination	10	56	1.39	2.07	2.31e-09	9606.ENSP00000265433,9606.ENSP00000278616,9606.ENSP00000321636,9606.ENSP00000325863,9606.ENSP00000336701,9606.ENSP00000347232,9606.ENSP00000369497,9606.ENSP00000382628,9606.ENSP00000418960,9606.ENSP00000493712	NBN,ATM,TOP3A,MRE11,RAD51C,BLM,BRCA2,RBBP8,BRCA1,RAD51
HSA-5696399	Global Genome Nucleotide Excision Repair (GG-NER)	11	83	1.26	1.91	4.05e-09	9606.ENSP00000013807,9606.ENSP00000256996,9606.ENSP00000285021,9606.ENSP00000285398,9606.ENSP00000310520,9606.ENSP00000364270,9606.ENSP00000368458,9606.ENSP00000375809,9606.ENSP00000472445,9606.ENSP00000476100,9606.ENSP00000498881	ERCC1,DDB2,XPC,ERCC3,ERCC4,XPA,PCNA,ERCC2,POLD1,GTF2H5,ERCC5
HSA-5696395	Formation of Incision Complex in GG-NER	9	42	1.47	2.05	5.01e-09	9606.ENSP00000013807,9606.ENSP00000256996,9606.ENSP00000285021,9606.ENSP00000285398,9606.ENSP00000310520,9606.ENSP00000364270,9606.ENSP00000375809,9606.ENSP00000476100,9606.ENSP00000498881	ERCC1,DDB2,XPC,ERCC3,ERCC4,XPA,ERCC2,GTF2H5,ERCC5
HSA-6796648	TP53 Regulates Transcription of DNA Repair Genes	10	62	1.35	1.97	5.11e-09	9606.ENSP00000256996,9606.ENSP00000278616,9606.ENSP00000285398,9606.ENSP00000287647,9606.ENSP00000289081,9606.ENSP00000310842,9606.ENSP00000343741,9606.ENSP00000375809,9606.ENSP00000418960,9606.ENSP00000476100	DDB2,ATM,ERCC3,FANCD2,FANCC,FANCI,ATR,ERCC2,BRCA1,GTF2H5
HSA-174437	Removal of the Flap Intermediate from the C-strand	7	17	1.76	2.09	1.38e-08	9606.ENSP00000267415,9606.ENSP00000298139,9606.ENSP00000350249,9606.ENSP00000351185,9606.ENSP00000368458,9606.ENSP00000472445,9606.ENSP00000483117	TINF2,WRN,POT1,DNA2,PCNA,POLD1,ACD
HSA-69620	Cell Cycle Checkpoints	15	272	0.88	1.32	1.16e-07	9606.ENSP00000258149,9606.ENSP00000259008,9606.ENSP00000265433,9606.ENSP00000278616,9606.ENSP00000287598,9606.ENSP00000298139,9606.ENSP00000321636,9606.ENSP00000323099,9606.ENSP00000325863,9606.ENSP00000339109,9606.ENSP00000343741,9606.ENSP00000347232,9606.ENSP00000351185,9606.ENSP00000382628,9606.ENSP00000418960	MDM2,BRIP1,NBN,ATM,BUB1B,WRN,TOP3A,ATRIP,MRE11,ANAPC1,ATR,BLM,DNA2,RBBP8,BRCA1
HSA-174411	Polymerase switching on the C-strand of the telomere	7	26	1.57	1.77	1.47e-07	9606.ENSP00000224950,9606.ENSP00000267415,9606.ENSP00000350249,9606.ENSP00000368458,9606.ENSP00000472445,9606.ENSP00000483117,9606.ENSP00000498499	STN1,TINF2,POT1,PCNA,POLD1,ACD,CTC1
HSA-74160	Gene expression (Transcription)	33	1476	0.49	0.87	2.5e-07	9606.ENSP00000256996,9606.ENSP00000258149,9606.ENSP00000259008,9606.ENSP00000265433,9606.ENSP00000275493,9606.ENSP00000278616,9606.ENSP00000285398,9606.ENSP00000286307,9606.ENSP00000287647,9606.ENSP00000289081,9606.ENSP00000298139,9606.ENSP00000310842,9606.ENSP00000321636,9606.ENSP00000323099,9606.ENSP00000325863,9606.ENSP00000339109,9606.ENSP00000339191,9606.ENSP00000343741,9606.ENSP00000347232,…	DDB2,MDM2,BRIP1,NBN,EGFR,ATM,ERCC3,LSM11,FANCD2,FANCC,WRN,FANCI,TOP3A,ATRIP,MRE11,ANAPC1,CAV1,ATR,BLM,ERCC6,GTF2E2,CAVIN1,DNA2,POLR3GL,POLR3A,PCNA,CPAP,ERCC2,RBBP8,BRCA1,GTF2H5,RAD51,TFAP2A
HSA-2129379	Molecules associated with elastic fibres	7	37	1.42	1.5	1.19e-06	9606.ENSP00000309953,9606.ENSP00000311905,9606.ENSP00000325527,9606.ENSP00000345008,9606.ENSP00000351807,9606.ENSP00000378058,9606.ENSP00000386043	EFEMP2,LTBP4,FBN1,FBLN5,ELN,EFEMP1,LTBP1
HSA-1643685	Disease	34	1702	0.44	0.76	2.08e-06	9606.ENSP00000029410,9606.ENSP00000258149,9606.ENSP00000259008,9606.ENSP00000261584,9606.ENSP00000265433,9606.ENSP00000275493,9606.ENSP00000278616,9606.ENSP00000285398,9606.ENSP00000298139,9606.ENSP00000301945,9606.ENSP00000321636,9606.ENSP00000323099,9606.ENSP00000325863,9606.ENSP00000330382,9606.ENSP00000336701,9606.ENSP00000339109,9606.ENSP00000339191,9606.ENSP00000343741,9606.ENSP00000347232,…	B4GALT7,MDM2,BRIP1,PALB2,NBN,EGFR,ATM,ERCC3,WRN,ANTXR1,TOP3A,ATRIP,MRE11,PDGFB,RAD51C,ANAPC1,CAV1,ATR,BLM,GTF2E2,DNA2,XRCC2,LMNA,B3GALT6,BRCA2,ERCC2,RBBP8,CNBP,BRCA1,PIK3R1,BANF1,GTF2H5,RAD51,IFIH1
HSA-73857	RNA Polymerase II Transcription	29	1337	0.48	0.77	4.5e-06	9606.ENSP00000256996,9606.ENSP00000258149,9606.ENSP00000259008,9606.ENSP00000265433,9606.ENSP00000275493,9606.ENSP00000278616,9606.ENSP00000285398,9606.ENSP00000286307,9606.ENSP00000287647,9606.ENSP00000289081,9606.ENSP00000298139,9606.ENSP00000310842,9606.ENSP00000321636,9606.ENSP00000323099,9606.ENSP00000325863,9606.ENSP00000339109,9606.ENSP00000339191,9606.ENSP00000343741,9606.ENSP00000347232,…	DDB2,MDM2,BRIP1,NBN,EGFR,ATM,ERCC3,LSM11,FANCD2,FANCC,WRN,FANCI,TOP3A,ATRIP,MRE11,ANAPC1,CAV1,ATR,BLM,GTF2E2,DNA2,PCNA,CPAP,ERCC2,RBBP8,BRCA1,GTF2H5,RAD51,TFAP2A
HSA-174430	Telomere C-strand synthesis initiation	5	13	1.73	1.42	5.99e-06	9606.ENSP00000224950,9606.ENSP00000267415,9606.ENSP00000350249,9606.ENSP00000483117,9606.ENSP00000498499	STN1,TINF2,POT1,ACD,CTC1
HSA-212436	Generic Transcription Pathway	27	1215	0.49	0.76	8.11e-06	9606.ENSP00000256996,9606.ENSP00000258149,9606.ENSP00000259008,9606.ENSP00000265433,9606.ENSP00000275493,9606.ENSP00000278616,9606.ENSP00000285398,9606.ENSP00000287647,9606.ENSP00000289081,9606.ENSP00000298139,9606.ENSP00000310842,9606.ENSP00000321636,9606.ENSP00000323099,9606.ENSP00000325863,9606.ENSP00000339109,9606.ENSP00000339191,9606.ENSP00000343741,9606.ENSP00000347232,9606.ENSP00000351185,…	DDB2,MDM2,BRIP1,NBN,EGFR,ATM,ERCC3,FANCD2,FANCC,WRN,FANCI,TOP3A,ATRIP,MRE11,ANAPC1,CAV1,ATR,BLM,DNA2,PCNA,CPAP,ERCC2,RBBP8,BRCA1,GTF2H5,RAD51,TFAP2A
HSA-2559586	DNA Damage/Telomere Stress Induced Senescence	7	60	1.21	1.15	2.09e-05	9606.ENSP00000265433,9606.ENSP00000267415,9606.ENSP00000278616,9606.ENSP00000307705,9606.ENSP00000325863,9606.ENSP00000350249,9606.ENSP00000483117	NBN,TINF2,ATM,H1-4,MRE11,POT1,ACD
HSA-6782210	Gap-filling DNA repair synthesis and ligation in TC-NER	7	64	1.18	1.11	3.07e-05	9606.ENSP00000265038,9606.ENSP00000285398,9606.ENSP00000348089,9606.ENSP00000368458,9606.ENSP00000375809,9606.ENSP00000472445,9606.ENSP00000476100	ERCC8,ERCC3,ERCC6,PCNA,ERCC2,POLD1,GTF2H5
HSA-380259	Loss of Nlp from mitotic centrosomes	7	69	1.15	1.05	4.81e-05	9606.ENSP00000270861,9606.ENSP00000317902,9606.ENSP00000336524,9606.ENSP00000343818,9606.ENSP00000352572,9606.ENSP00000370337,9606.ENSP00000371308	PLK4,CEP57,CEP63,CDK5RAP2,PCNT,CEP152,CPAP
HSA-8854518	AURKA Activation by TPX2	7	72	1.13	1.03	6.05e-05	9606.ENSP00000270861,9606.ENSP00000317902,9606.ENSP00000336524,9606.ENSP00000343818,9606.ENSP00000352572,9606.ENSP00000370337,9606.ENSP00000371308	PLK4,CEP57,CEP63,CDK5RAP2,PCNT,CEP152,CPAP
HSA-69278	Cell Cycle, Mitotic	16	526	0.63	0.77	6.68e-05	9606.ENSP00000270861,9606.ENSP00000287598,9606.ENSP00000293760,9606.ENSP00000315644,9606.ENSP00000317902,9606.ENSP00000336524,9606.ENSP00000339109,9606.ENSP00000343818,9606.ENSP00000351185,9606.ENSP00000352572,9606.ENSP00000357283,9606.ENSP00000368458,9606.ENSP00000370337,9606.ENSP00000371308,9606.ENSP00000433760,9606.ENSP00000472445	PLK4,BUB1B,LEMD2,TYMS,CEP57,CEP63,ANAPC1,CDK5RAP2,DNA2,PCNT,LMNA,PCNA,CEP152,CPAP,BANF1,POLD1
HSA-380270	Recruitment of mitotic centrosome proteins and complexes	7	80	1.08	0.96	0.00011	9606.ENSP00000270861,9606.ENSP00000317902,9606.ENSP00000336524,9606.ENSP00000343818,9606.ENSP00000352572,9606.ENSP00000370337,9606.ENSP00000371308	PLK4,CEP57,CEP63,CDK5RAP2,PCNT,CEP152,CPAP
HSA-6781823	Formation of TC-NER Pre-Incision Complex	6	53	1.2	0.97	0.00014	9606.ENSP00000265038,9606.ENSP00000285398,9606.ENSP00000348089,9606.ENSP00000364270,9606.ENSP00000375809,9606.ENSP00000476100	ERCC8,ERCC3,ERCC6,XPA,ERCC2,GTF2H5
HSA-2559583	Cellular Senescence	9	163	0.88	0.86	0.00015	9606.ENSP00000258149,9606.ENSP00000265433,9606.ENSP00000267415,9606.ENSP00000278616,9606.ENSP00000307705,9606.ENSP00000325863,9606.ENSP00000339109,9606.ENSP00000350249,9606.ENSP00000483117	MDM2,NBN,TINF2,ATM,H1-4,MRE11,ANAPC1,POT1,ACD
HSA-5685939	HDR through MMEJ (alt-NHEJ)	4	12	1.67	1.04	0.00015	9606.ENSP00000265433,9606.ENSP00000325863,9606.ENSP00000369497,9606.ENSP00000382628	NBN,MRE11,BRCA2,RBBP8
HSA-2565942	Regulation of PLK1 Activity at G2/M Transition	7	87	1.05	0.91	0.00017	9606.ENSP00000270861,9606.ENSP00000317902,9606.ENSP00000336524,9606.ENSP00000343818,9606.ENSP00000352572,9606.ENSP00000370337,9606.ENSP00000371308	PLK4,CEP57,CEP63,CDK5RAP2,PCNT,CEP152,CPAP
HSA-3108232	SUMO E3 ligases SUMOylate target proteins	9	166	0.88	0.84	0.00017	9606.ENSP00000258149,9606.ENSP00000285021,9606.ENSP00000287437,9606.ENSP00000298139,9606.ENSP00000347232,9606.ENSP00000354957,9606.ENSP00000368458,9606.ENSP00000418960,9606.ENSP00000501092	MDM2,XPC,NSMCE2,WRN,BLM,SMC5,PCNA,BRCA1,TFAP2A
HSA-2564830	Cytosolic iron-sulfur cluster assembly	4	13	1.63	1.01	0.00019	9606.ENSP00000259008,9606.ENSP00000353332,9606.ENSP00000375809,9606.ENSP00000472445	BRIP1,RTEL1,ERCC2,POLD1
HSA-1221632	Meiotic synapsis	6	60	1.14	0.9	0.00025	9606.ENSP00000267415,9606.ENSP00000343741,9606.ENSP00000350249,9606.ENSP00000357283,9606.ENSP00000418960,9606.ENSP00000483117	TINF2,ATR,POT1,LMNA,BRCA1,ACD
HSA-380320	Recruitment of NuMA to mitotic centrosomes	7	93	1.02	0.86	0.00025	9606.ENSP00000270861,9606.ENSP00000317902,9606.ENSP00000336524,9606.ENSP00000343818,9606.ENSP00000352572,9606.ENSP00000370337,9606.ENSP00000371308	PLK4,CEP57,CEP63,CDK5RAP2,PCNT,CEP152,CPAP
HSA-5620912	Anchoring of the basal body to the plasma membrane	7	97	1	0.84	0.00031	9606.ENSP00000270861,9606.ENSP00000317902,9606.ENSP00000336524,9606.ENSP00000343818,9606.ENSP00000352572,9606.ENSP00000370337,9606.ENSP00000371308	PLK4,CEP57,CEP63,CDK5RAP2,PCNT,CEP152,CPAP
HSA-110313	Translesion synthesis by Y family DNA polymerases bypasses lesions on DNA template	5	39	1.25	0.86	0.00047	9606.ENSP00000235310,9606.ENSP00000295050,9606.ENSP00000361310,9606.ENSP00000368458,9606.ENSP00000472445	MAD2L2,SPRTN,POLH,PCNA,POLD1
HSA-3108214	SUMOylation of DNA damage response and repair proteins	6	75	1.05	0.77	0.00078	9606.ENSP00000285021,9606.ENSP00000287437,9606.ENSP00000298139,9606.ENSP00000347232,9606.ENSP00000354957,9606.ENSP00000418960	XPC,NSMCE2,WRN,BLM,SMC5,BRCA1
HSA-68886	M Phase	12	382	0.64	0.63	0.00083	9606.ENSP00000270861,9606.ENSP00000287598,9606.ENSP00000293760,9606.ENSP00000317902,9606.ENSP00000336524,9606.ENSP00000339109,9606.ENSP00000343818,9606.ENSP00000352572,9606.ENSP00000357283,9606.ENSP00000370337,9606.ENSP00000371308,9606.ENSP00000433760	PLK4,BUB1B,LEMD2,CEP57,CEP63,ANAPC1,CDK5RAP2,PCNT,LMNA,CEP152,CPAP,BANF1
HSA-5693548	Sensing of DNA Double Strand Breaks	3	6	1.84	0.85	0.00088	9606.ENSP00000265433,9606.ENSP00000278616,9606.ENSP00000325863	NBN,ATM,MRE11
HSA-2262752	Cellular responses to stress	17	747	0.5	0.56	0.001	9606.ENSP00000253413,9606.ENSP00000258149,9606.ENSP00000261584,9606.ENSP00000265433,9606.ENSP00000267415,9606.ENSP00000273398,9606.ENSP00000278616,9606.ENSP00000307705,9606.ENSP00000325863,9606.ENSP00000339109,9606.ENSP00000343741,9606.ENSP00000350249,9606.ENSP00000357283,9606.ENSP00000361433,9606.ENSP00000387911,9606.ENSP00000418960,9606.ENSP00000483117	ATP6V1E1,MDM2,PALB2,NBN,TINF2,ATP6V1A,ATM,H1-4,MRE11,ANAPC1,ATR,POT1,LMNA,EXOSC2,PARN,BRCA1,ACD
HSA-73863	RNA Polymerase I Transcription Termination	4	30	1.27	0.68	0.0028	9606.ENSP00000285398,9606.ENSP00000349541,9606.ENSP00000375809,9606.ENSP00000476100	ERCC3,CAVIN1,ERCC2,GTF2H5
HSA-68877	Mitotic Prometaphase	8	201	0.74	0.56	0.0038	9606.ENSP00000270861,9606.ENSP00000287598,9606.ENSP00000317902,9606.ENSP00000336524,9606.ENSP00000343818,9606.ENSP00000352572,9606.ENSP00000370337,9606.ENSP00000371308	PLK4,BUB1B,CEP57,CEP63,CDK5RAP2,PCNT,CEP152,CPAP
HSA-69166	Removal of the Flap Intermediate	3	14	1.47	0.6	0.0063	9606.ENSP00000351185,9606.ENSP00000368458,9606.ENSP00000472445	DNA2,PCNA,POLD1
HSA-73884	Base Excision Repair	5	72	0.98	0.56	0.0063	9606.ENSP00000267415,9606.ENSP00000350249,9606.ENSP00000368458,9606.ENSP00000472445,9606.ENSP00000483117	TINF2,POT1,PCNA,POLD1,ACD
HSA-73864	RNA Polymerase I Transcription	5	79	0.94	0.52	0.0092	9606.ENSP00000285398,9606.ENSP00000348089,9606.ENSP00000349541,9606.ENSP00000375809,9606.ENSP00000476100	ERCC3,ERCC6,CAVIN1,ERCC2,GTF2H5
HSA-1474244	Extracellular matrix organization	9	300	0.62	0.45	0.0104	9606.ENSP00000309953,9606.ENSP00000311905,9606.ENSP00000325527,9606.ENSP00000330382,9606.ENSP00000345008,9606.ENSP00000351807,9606.ENSP00000356899,9606.ENSP00000378058,9606.ENSP00000386043	EFEMP2,LTBP4,FBN1,PDGFB,FBLN5,ELN,DDR2,EFEMP1,LTBP1
HSA-2995383	Initiation of Nuclear Envelope (NE) Reformation	3	18	1.36	0.53	0.0114	9606.ENSP00000293760,9606.ENSP00000357283,9606.ENSP00000433760	LEMD2,LMNA,BANF1
HSA-73762	RNA Polymerase I Transcription Initiation	4	46	1.08	0.51	0.0116	9606.ENSP00000285398,9606.ENSP00000348089,9606.ENSP00000375809,9606.ENSP00000476100	ERCC3,ERCC6,ERCC2,GTF2H5
HSA-110320	Translesion Synthesis by POLH	3	19	1.34	0.52	0.0124	9606.ENSP00000295050,9606.ENSP00000361310,9606.ENSP00000368458	SPRTN,POLH,PCNA
HSA-167161	HIV Transcription Initiation	4	47	1.07	0.5	0.0124	9606.ENSP00000285398,9606.ENSP00000348168,9606.ENSP00000375809,9606.ENSP00000476100	ERCC3,GTF2E2,ERCC2,GTF2H5
HSA-167162	RNA Polymerase II HIV Promoter Escape	4	47	1.07	0.5	0.0124	9606.ENSP00000285398,9606.ENSP00000348168,9606.ENSP00000375809,9606.ENSP00000476100	ERCC3,GTF2E2,ERCC2,GTF2H5
HSA-73776	RNA Polymerase II Promoter Escape	4	47	1.07	0.5	0.0124	9606.ENSP00000285398,9606.ENSP00000348168,9606.ENSP00000375809,9606.ENSP00000476100	ERCC3,GTF2E2,ERCC2,GTF2H5
HSA-73779	RNA Polymerase II Transcription Pre-Initiation And Promoter Opening	4	47	1.07	0.5	0.0124	9606.ENSP00000285398,9606.ENSP00000348168,9606.ENSP00000375809,9606.ENSP00000476100	ERCC3,GTF2E2,ERCC2,GTF2H5
HSA-75953	RNA Polymerase II Transcription Initiation	4	47	1.07	0.5	0.0124	9606.ENSP00000285398,9606.ENSP00000348168,9606.ENSP00000375809,9606.ENSP00000476100	ERCC3,GTF2E2,ERCC2,GTF2H5
HSA-5693571	Nonhomologous End-Joining (NHEJ)	4	51	1.04	0.48	0.0151	9606.ENSP00000265433,9606.ENSP00000278616,9606.ENSP00000325863,9606.ENSP00000418960	NBN,ATM,MRE11,BRCA1
HSA-379716	Cytosolic tRNA aminoacylation	3	24	1.24	0.46	0.0209	9606.ENSP00000261772,9606.ENSP00000262027,9606.ENSP00000387710	AARS1,MARS1,TARS1
HSA-5693565	Recruitment and ATM-mediated phosphorylation of repair and signaling proteins at DNA double strand breaks	4	60	0.97	0.42	0.0256	9606.ENSP00000265433,9606.ENSP00000278616,9606.ENSP00000325863,9606.ENSP00000418960	NBN,ATM,MRE11,BRCA1
HSA-167160	RNA Pol II CTD phosphorylation and interaction with CE during HIV infection	3	27	1.19	0.42	0.0278	9606.ENSP00000285398,9606.ENSP00000375809,9606.ENSP00000476100	ERCC3,ERCC2,GTF2H5
HSA-77075	RNA Pol II CTD phosphorylation and interaction with CE	3	27	1.19	0.42	0.0278	9606.ENSP00000285398,9606.ENSP00000375809,9606.ENSP00000476100	ERCC3,ERCC2,GTF2H5
HSA-1834949	Cytosolic sensors of pathogen-associated DNA	4	63	0.94	0.4	0.0293	9606.ENSP00000325863,9606.ENSP00000358320,9606.ENSP00000361446,9606.ENSP00000486676	MRE11,POLR3GL,POLR3A,TREX1
HSA-1852241	Organelle biogenesis and maintenance	8	293	0.58	0.35	0.0317	9606.ENSP00000249442,9606.ENSP00000270861,9606.ENSP00000317902,9606.ENSP00000336524,9606.ENSP00000343818,9606.ENSP00000352572,9606.ENSP00000370337,9606.ENSP00000371308	MTX2,PLK4,CEP57,CEP63,CDK5RAP2,PCNT,CEP152,CPAP
HSA-72086	mRNA Capping	3	29	1.16	0.4	0.0323	9606.ENSP00000285398,9606.ENSP00000375809,9606.ENSP00000476100	ERCC3,ERCC2,GTF2H5
HSA-77387	Insulin receptor recycling	3	30	1.14	0.39	0.035	9606.ENSP00000253413,9606.ENSP00000273398,9606.ENSP00000332247	ATP6V1E1,ATP6V1A,ATP6V0A2
HSA-917977	Transferrin endocytosis and recycling	3	31	1.13	0.38	0.0379	9606.ENSP00000253413,9606.ENSP00000273398,9606.ENSP00000332247	ATP6V1E1,ATP6V1A,ATP6V0A2
HSA-5656169	Termination of translesion DNA synthesis	3	32	1.11	0.38	0.0405	9606.ENSP00000361310,9606.ENSP00000368458,9606.ENSP00000472445	POLH,PCNA,POLD1
HSA-113418	Formation of the Early Elongation Complex	3	33	1.1	0.37	0.0432	9606.ENSP00000285398,9606.ENSP00000375809,9606.ENSP00000476100	ERCC3,ERCC2,GTF2H5
HSA-167158	Formation of the HIV-1 Early Elongation Complex	3	33	1.1	0.37	0.0432	9606.ENSP00000285398,9606.ENSP00000375809,9606.ENSP00000476100	ERCC3,ERCC2,GTF2H5
HSA-171306	Packaging Of Telomere Ends	3	33	1.1	0.37	0.0432	9606.ENSP00000267415,9606.ENSP00000350249,9606.ENSP00000483117	TINF2,POT1,ACD
HSA-8953750	Transcriptional Regulation by E2F6	3	34	1.09	0.36	0.0455	9606.ENSP00000382628,9606.ENSP00000418960,9606.ENSP00000493712	RBBP8,BRCA1,RAD51
